# Supplementary material for: DAF-16/FOXO and HLH-30/TFEB comprise a cooperative regulatory axis controlling tubular lysosome induction in C. elegans
Source: Research Square preprint supplement (doi:10.21203/rs.3.rs-4049366/v1), 2024-03-29
Supplement: Supplementary file 1 [file 9b41feea1617746ebb39b6d0.xlsx]

## Sheet: final_summary
gene_id	symbol	gene_name	N2_1	N2_2	N2_3	SVIP-OE_1	SVIP-OE_2	SVIP-OE_3	daf-16_1	daf-16_2	daf-16_3	daf-16_SVIP_1	daf-16_SVIP_2	daf-16_SVIP_3	SVIP-OE_N2.log2FC	SVIP-OE_N2.padj	daf-16_SVIP_daf-16.log2FC	daf-16_SVIP_daf-16.padj	URL	description
WBGene00019450	K06H6.2	K06H6.2	0	0	1	297	233	224	2	5	1	5	8	4	9.68737	1.0218e-13			LINK	none available
WBGene00019449	K06H6.1	K06H6.1	0	0	0	97	88	71	1	1	0	0	0	0	9.09254	1.19358e-11			LINK	none available
WBGene00010166	gmd-2	F56H6.5	0	1	0	143	125	113	3	0	2	4	0	2	8.70431	5.39426e-11			LINK	gmd-2 encodes one of two C. elegans GDP-mannose dehydratases; in vitro, and when coexpressed with GER-1, GMD-2 catalyzes the formation of GDP-fucose from GDP-mannose; gmd-2 transcripts are generally present throughout larval and adult stages.
WBGene00015760	C14C6.6	C14C6.6	0	0	1	71	69	57	0	0	0	3	1	3	7.75413	1.66879e-08			LINK	none available
WBGene00015762	C14C6.8	C14C6.8	0	0	0	33	27	25	1	0	1	4	2	5	7.50089	2.73518e-07			LINK	none available
WBGene00015757	C14C6.3	C14C6.3	0	0	0	34	26	19	0	0	0	0	0	0	7.39275	7.32147e-07			LINK	none available
WBGene00021086	W08E12.5	W08E12.5	0	0	0	24	21	17	1	5	8	9	9	7	7.04617	3.72368e-06			LINK	none available
WBGene00022758	ZK488.6	ZK488.6	0	0	1	34	32	25	4	0	1	0	0	1	6.63908	5.80273e-06			LINK	none available
WBGene00009279	F31B9.2	F31B9.2	0	0	0	7	19	17	1	0	2	0	3	0	6.53483	0.000118813			LINK	none available
WBGene00022757	ZK488.5	ZK488.5	0	0	0	16	10	11	0	1	0	1	1	0	6.29723	0.00016113			LINK	none available
WBGene00019451	nstp-7	K06H6.3	0	0	0	10	11	12	0	0	0	1	0	1	6.14153	0.000283501			LINK	none available
WBGene00018052	F35F10.1	F35F10.1	5	2	1	152	150	156	74	77	79	174	146	195	6.08009	9.72676e-24			LINK	none available
WBGene00012791	Y43D4A.5	Y43D4A.5a	0	4	2	133	131	57	4	3	6	0	0	0	5.98011	1.96964e-13	-4.91836	0.00531387	LINK	none available
WBGene00015879	C17B7.5	C17B7.5	4	0	0	74	66	64	22	29	14	285	187	214	5.91153	4.06148e-11	3.00773	3.23415e-31	LINK	none available
WBGene00019452	K06H6.4	K06H6.4	1	0	0	19	12	20	0	0	0	1	1	0	5.80155	0.000240639			LINK	none available
WBGene00194737	Y50D7A.13	Y50D7A.13	0	0	0	7	6	10	0	1	0	1	0	0	5.61923	0.00254145			LINK	none available
WBGene00018061	arrd-19	F35F10.12	10	1	1	188	182	129	101	93	75	77	51	44	5.61864	7.3793e-20	-1.03179	9.62877e-05	LINK	none available
WBGene00012304	cutl-4	W06D12.1	0	0	0	6	8	7	0	0	0	2	1	0	5.49146	0.00370393			LINK	none available
WBGene00004170	pqn-90	Y73F8A.8	0	0	0	5	12	3	0	0	0	0	0	0	5.42796	0.00883155			LINK	The protein product of this gene is predicted to contain a glutamine/asparagine (Q/N)-rich ('prion') domain, by the algorithm of Michelitsch and Weissman (as of the WS77 release of WormBase, i.e., in wormpep77).
WBGene00000676	col-102	C18H7.3	0	0	0	7	4	9	0	0	0	0	1	0	5.41352	0.00583898			LINK	col-102 encodes a cuticle collagen.
WBGene00018060	arrd-18	F35F10.11	9	1	0	115	135	107	26	29	34	34	34	41	5.40604	4.1297e-15			LINK	none available
WBGene00015761	C14C6.7	C14C6.7	0	0	0	5	4	10	0	0	0	2	1	0	5.34526	0.00820267			LINK	none available
WBGene00001739	grl-30	T24A6.3	0	0	0	7	8	4	0	0	0	3	5	1	5.34266	0.00706418			LINK	none available
WBGene00009720	F45B8.3	F45B8.3	1	0	1	25	30	12	0	0	0	1	2	1	5.29845	0.000162904			LINK	none available
WBGene00017877	F28A10.9	F28A10.9	0	0	0	2	5	11	0	2	0	0	1	0	5.27861	0.0156011			LINK	none available
WBGene00007380	C06C6.6	C06C6.6	0	0	1	12	9	12	4	1	3	3	1	5	5.17483	0.0019979			LINK	none available
WBGene00018054	F35F10.4	F35F10.4	1	1	0	24	10	27	11	9	2	42	30	42	5.17041	0.000307678	1.97899	0.000217258	LINK	none available
WBGene00017937	F30H5.3	F30H5.3	34	4	4	472	590	143	10	10	10	1	1	0	5.09286	4.60568e-05	-4.28082	0.0011488	LINK	none available
WBGene00195165	F57G4.11	F57G4.11	2	0	0	13	16	25	0	0	0	20	10	14	5.00246	0.000579816	5.91938	3.65268e-05	LINK	none available
WBGene00022818	ZK783.3	ZK783.3	0	0	2	10	21	17	3	1	3	1	0	4	4.81361	0.00124282			LINK	none available
WBGene00000029	abu-6	C03A7.7	0	9	9	173	184	73	0	2	4	1	1	0	4.80669	2.36192e-11			LINK	abu-6 encodes a transmembrane protein with a predicted signal sequence, a glutamine/asparagine-rich domain and multiple cysteine-rich repeats (DUF139); abu-6 expression is induced by blockage of the unfolded-protein response in the endoplasmic reticulum, and ABU-6 may help protect the organism from damage by improperly folded nascent protein.
WBGene00022680	ZK180.6	ZK180.6	45	92	61	1722	1894	832	26	21	26	3	3	8	4.73251	1.18343e-36	-2.76053	6.64579e-06	LINK	none available
WBGene00013226	faah-5	Y56A3A.5	0	0	1	10	8	6	4	5	2	13	6	8	4.7133	0.00874713			LINK	none available
WBGene00008448	E01G4.6	E01G4.6	12	251	169	3871	3963	1671	71	64	67	8	25	11	4.69772	0.000129088	-2.54116	3.84153e-11	LINK	none available
WBGene00003848	odr-1	R01E6.1a	2	1	4	59	60	35	3	5	8	41	35	51	4.68668	1.9835e-09	2.61249	1.32389e-06	LINK	odr-1 encodes a putative guanylyl cyclase; odr-1 activity is required for normal responses to all AWC-sensed odorants; ODR-1 is expressed in chemosensory neurons including AWC, where it localizes to the flattened ciliated endings.
WBGene00000251	bli-1	C09G5.6	4	67	67	1159	1262	592	12	15	24	1	3	4	4.6727	6.63561e-05	-3.03159	0.000114162	LINK	The bli-1 gene encodes an unusual cuticular collagen that is required for proper strut formation within the unique medial layer of the adult cuticle; bli-1 interacts genetically with other cuticular collagens such as bli-2 and rol-1, and may be processed for secretion by BLI-4, a Kex2/subtilisin serine endoproteinase; consistent with its role in adult cuticle formation, bli-1 mRNA is highly expre…
WBGene00000521	cky-1	C15C8.2a	1	0	0	9	8	6	0	2	0	1	3	6	4.65373	0.0101592			LINK	cky-1 encodes a member of the basic helix-loop-helix/Per-Arnt-Sim (bHLH-PAS) protein family; CKY-1 physically interacts with AHA-1, and when co-expressed in vitro, an AHA-1/CKY-1 complex exhibits sequence-specific DNA binding; when co-expressed in cultured cells, the AHA-1/CKY-1 complex can stimulate reporter gene transcription; cky-1 is expressed in non-neuronal pharyngeal cells.
WBGene00012186	mlt-11	W01F3.3a	98	20	18	858	1476	393	56	44	67	12	4	13	4.58179	1.05029e-05	-2.91147	2.77795e-12	LINK	mlt-11 encodes one of 13 C. elegans proteins related to the mammalian Tissue Factor Pathway Inhibitors (TFPIs), serine protease inhibitors that function in blood coagulation (OMIM:152310); in C. elegans, genetic analysis indicates that mlt-11 is required for proper molting and, likely, for proper spatial and/or temporal regulation of proteolysis during the molting cycle; a mlt-11::gfp promoter fu…
WBGene00011183	R09H10.6	R09H10.6	0	1	1	14	17	9	0	0	0	0	4	3	4.55925	0.0020394			LINK	none available
WBGene00009752	F46A8.9	F46A8.9	0	1	1	19	13	7	1	2	0	0	1	3	4.51208	0.00297703			LINK	none available
WBGene00014009	lips-6	ZK617.2	1	0	1	18	13	7	5	2	5	43	15	22	4.46989	0.00325233	2.33591	0.000692694	LINK	none available
WBGene00013995	mboa-5	ZK550.1	0	0	1	7	11	2	1	0	0	1	0	0	4.45858	0.0279941			LINK	mboa-5 encodes a putative transmembrane O-acyl transferase (MBOAT) orthologous to human MBOAT1 (OMIM:611732), and paralogous to C08F8.4 and C54G7.2; MBOA-5 has no obvious function in mass RNAi assays, and mboa-5(RNAi) animals incorporate exogenous arachidonic acid into phosphatidylcholine (PC), phosphatidylserine (PS) and phosphatidylethanolamine (PE) normally.
WBGene00018056	F35F10.6	F35F10.6	7	1	3	67	51	85	15	21	29	106	84	114	4.44078	3.58316e-11	1.84723	1.39609e-09	LINK	none available
WBGene00000701	col-127	F54D1.3	0	2	0	12	2	22	0	8	0	0	0	2	4.42965	0.0167511			LINK	none available
WBGene00022103	cdh-12	Y71D11A.1	26	17	18	353	574	180	10	19	4	2	3	4	4.42502	6.21219e-20	-2.27419	0.0125787	LINK	cdh-12 encodes a cadherin; by sequence similarity, CDH-12 is predicted to function in cellular adhesion.
WBGene00004231	ptr-17	Y18D10A.7a	4	1	0	29	36	24	6	3	0	3	15	7	4.40228	7.46577e-06			LINK	ptr-17 encodes a divergent ortholog of Drosophila and human PTCHD3, which defines one of seven paralogous families of sterol sensing domain (SSD) proteins; PTR-17 is required for normal adult alae formation.
WBGene00005650	srp-9	F09C6.5	0	1	0	4	12	3	1	1	0	1	1	1	4.39497	0.0314168			LINK	none available
WBGene00019756	M03E7.4	M03E7.4	4	1	2	53	50	22	0	0	1	0	1	1	4.39052	4.02431e-07			LINK	M03E7.4 encodes a protein, predicted to be secreted, with one chitin-binding peritrophin-A and three low-density lipoprotein receptor domain class A domains; M03E7.4 has no obvious function in mass RNAi assays.
WBGene00010830	M02G9.1	M02G9.1a	5	4	3	84	93	35	3	2	1	2	0	0	4.3826	2.83513e-10			LINK	none available
WBGene00000025	abu-2	F19G12.7	0	1	0	7	4	8	0	0	0	0	0	0	4.37691	0.0225558			LINK	abu-2 encodes a transmembrane protein with a predicted signal sequence, a glutamine/asparagine-rich domain and multiple cysteine-rich repeats (DUF139); abu-2 expression is induced by blockage of the unfolded-protein response in the endoplasmic reticulum, and ABU-2 may help protect the organism from damage by improperly folded nascent protein.
WBGene00020032	R12E2.6	R12E2.6	0	1	0	11	1	7	0	1	0	0	0	0	4.35966	0.043353			LINK	none available
WBGene00305049			0	0	1	3	7	8	1	0	0	2	0	1	4.31467	0.0293863			LINK
WBGene00017878	F28A10.10	F28A10.10	0	1	0	6	3	9	0	0	0	0	0	0	4.30019	0.030646			LINK	none available
WBGene00000639	col-63	ZK265.2	24	241	196	2927	2902	1795	76	90	80	187	123	152	4.2798	1.43996e-05			LINK	none available
WBGene00020590	T19H12.6	T19H12.6	3	1	1	22	36	21	2	1	2	1	0	4	4.22815	1.7139e-05			LINK	none available
WBGene00270321			255	575	539	7301	6481	7901	827	738	816	9581	7708	8995	4.21776	2.00771e-42	3.08671	0	LINK
WBGene00004118	pqn-29	F10F2.9	2	2	3	35	57	18	3	1	0	0	4	2	4.2121	3.71025e-06			LINK	The protein product of this gene is predicted to contain a glutamine/asparagine (Q/N)-rich ('prion') domain, by the algorithm of Michelitsch and Weissman (as of the WS77 release of WormBase, i.e., in wormpep77).
WBGene00044235	C06A1.7	C06A1.7	0	2	0	10	9	12	1	1	0	0	0	3	4.21015	0.00811433			LINK	none available
WBGene00016731	C46H11.7	C46H11.7	6	0	3	54	69	19	0	1	2	1	2	2	4.20866	1.28898e-05			LINK	none available
WBGene00013058	clec-247	Y51A2A.1	0	1	4	25	33	21	2	4	6	11	5	8	4.20457	4.14666e-05			LINK	none available
WBGene00000647	col-71	Y49F6B.10	40	531	380	5802	6021	2888	170	128	155	52	43	37	4.18807	0.000139646	-2.1521	1.87872e-22	LINK	none available
WBGene00004394	rol-1	Y57A10A.11	28	459	299	4709	4814	2584	103	109	132	71	64	57	4.18565	0.000239004	-1.21292	4.48391e-08	LINK	rol-1 encodes a nematode cuticular collagen required for normal body morphology at the adult stage of development; rol-1 expression is under the control of the heterochronic pathway, as heterochronic mutants that synthesize adult cuticle early produce animals that roll as larvae, while heterochronic mutants that fail to execute normal adult development never display the roller phenotype.
WBGene00004264	qua-1	T05C12.10	86	47	30	826	1181	463	27	19	21	51	34	44	4.17456	3.38965e-20			LINK	qua-1 encodes a hedgehog-like protein, with (from N- to C-terminus) a signal sequence, a Qua domain, a 5W repeat, an extended region of low-complexity sequence, and a Hint/Hog domain; QUA-1 is conserved among nematodes from Caenorhabditis to Brugia; QUA-1 is expressed prior to molting in hyp1 to hyp11 hypodermal cells, but not in seam cells, and ceases to be expressed after each molting cycle or …
WBGene00022156	Y71G12B.18	Y71G12B.18	3	8	8	120	100	72	5	1	6	12	5	11	4.17317	1.12899e-15			LINK	none available
WBGene00008449	E01G6.1	E01G6.1	10	4	4	106	105	60	5	1	5	1	0	2	4.15016	2.27576e-13			LINK	none available
WBGene00007481	C09F9.4	C09F9.4	4	0	4	51	51	19	9	0	3	0	0	0	4.13683	8.45436e-06			LINK	none available
WBGene00010573	K04H4.2	K04H4.2a	54	20	29	505	742	264	26	14	28	8	8	7	4.114	4.01362e-17	-1.92415	0.000663855	LINK	K04H4.2 encodes, by alternative splicing, three proteins ranging from 628 to 1446 residues in length; K04H4.2 proteins are predicted to be secreted, with an N-terminal chitin-binding peritrophin-A domain followed by up to 15 cysteine-rich domains; the general organization of K04H4.2 protein resembles that of T10E10.4; in mass RNAi assays, K04H4.2 is required for larval growth and locomotion; K04H…
WBGene00018292	F41E6.11	F41E6.11	4	17	14	179	246	79	4	1	0	2	1	0	4.08699	3.32167e-11			LINK	none available
WBGene00004141	pqn-57	R09F10.7	1	20	0	122	115	53	0	2	0	2	0	0	4.08566	0.0308647			LINK	The protein product of this gene is predicted to contain a glutamine/asparagine (Q/N)-rich ('prion') domain, by the algorithm of Michelitsch and Weissman (as of the WS77 release of WormBase, i.e., in wormpep77).
WBGene00013471	clec-242	Y68A4B.2	0	1	1	16	9	4	1	0	2	3	0	1	4.07921	0.0140653			LINK	none available
WBGene00001691	grd-2	F46B3.5	6	5	12	144	117	72	0	2	4	1	4	4	4.07465	2.42219e-14			LINK	grd-2 encodes a hedgehog-like protein, with (from N- to C-terminus) a signal sequence, four Ground domains, an short region of low-complexity sequence, and a Hint/Hog domain; the Hint/Hog domain is predicted to cut GRD-2 into two halves and then covalently link cholesterol to the C-terminus of the Ground domain; the four N-terminal Ground domains are predicted to form one or more cysteine-crossli…
WBGene00004146	pqn-63	T06E4.11	0	5	10	79	99	37	0	2	1	1	0	0	4.05547	2.24131e-06			LINK	The protein product of this gene is predicted to contain a glutamine/asparagine (Q/N)-rich ('prion') domain, by the algorithm of Michelitsch and Weissman (as of the WS77 release of WormBase, i.e., in wormpep77).
WBGene00044521	Y5H2A.4	Y5H2A.4	0	5	1	33	35	15	0	1	2	1	2	0	4.0439	0.000139885			LINK	none available
WBGene00021931	Y55F3AM.14	Y55F3AM.14	6	2	6	70	90	35	9	2	5	2	3	4	4.0294	7.78553e-09			LINK	none available
WBGene00013171	Y53F4B.25	Y53F4B.25	2	2	6	45	66	25	1	3	9	0	1	0	3.99093	9.7208e-07	-3.94665	0.0303506	LINK	none available
WBGene00015885	fbxa-65	C17B7.11	27	5	9	170	126	253	225	153	231	443	401	480	3.98116	1.67138e-11			LINK	This gene encodes a protein containing an F-box, a motif predicted to mediate protein-protein interactions either with homologs of yeast Skp-1p or with other proteins; this gene's encoded protein also contains an FTH/DUF38 motif, which may also mediate protein-protein interaction.
WBGene00014047	clec-61	ZK666.7	1	3	3	26	36	30	3	4	9	5	3	2	3.95716	1.81554e-06			LINK	none available
WBGene00010464	K01D12.5	K01D12.5	2	6	7	88	69	42	0	7	4	4	0	0	3.9559	5.54264e-10			LINK	none available
WBGene00012814	Y43F8B.3	Y43F8B.3a	8	10	14	137	203	82	6	3	2	0	1	1	3.95502	3.07205e-14			LINK	none available
WBGene00013173	Y53F4B.27	Y53F4B.27a	21	18	10	226	268	129	10	8	8	17	15	17	3.91561	1.54022e-19			LINK	none available
WBGene00000655	col-79	C09G5.3	4	32	25	291	312	178	20	17	14	39	19	15	3.91446	1.81192e-11			LINK	none available
WBGene00013846	ZC84.1	ZC84.1	1	2	5	31	46	25	2	0	0	0	1	0	3.90151	4.19276e-06			LINK	none available
WBGene00000711	col-138	C52D10.13	42	605	475	5572	5590	3017	165	141	145	43	38	37	3.89235	0.000547287	-2.31042	1.88881e-25	LINK	none available
WBGene00018640	F49E10.2	F49E10.2a	16	4	2	102	121	50	1	2	1	1	4	0	3.88317	1.81696e-07			LINK	none available
WBGene00022679	ZK180.5	ZK180.5a	354	219	181	3636	4189	1538	103	111	96	17	4	13	3.87758	5.88772e-22	-3.58625	4.48821e-25	LINK	none available
WBGene00011536	T06E4.9	T06E4.9	1	21	24	199	253	120	2	3	2	2	0	0	3.86142	2.554e-07			LINK	none available
WBGene00010970	glb-20	R01E6.6	72	96	92	1041	902	1246	35	30	32	2740	2176	2489	3.85251	1.30428e-68	5.87632	3.41205e-302	LINK	glb-20 encodes a globin; glb-20 transcription is higher in L3 and dauers than in young adults; glb-20 has no obvious function in mass RNAi assays.
WBGene00020465	T12E12.6	T12E12.6	1	4	0	24	29	7	0	0	0	1	0	0	3.84962	0.0020593			LINK	none available
WBGene00017211	fbxb-36	F07E5.6	0	1	3	10	20	19	3	3	2	5	1	7	3.845	0.00156097			LINK	none available
WBGene00001066	dpy-4	Y41E3.2	391	362	361	5157	5805	2622	100	132	136	20	20	29	3.8436	2.52222e-37	-2.79407	5.19922e-24	LINK	dpy-4 encodes a cuticle collagen; dpy-4 activity is required for normal body morphology, locomotion, and larval development.
WBGene00017185	F07B7.1	F07B7.1	0	5	3	34	41	22	4	4	2	17	18	15	3.84264	1.57953e-05	1.95081	0.0124427	LINK	none available
WBGene00015758	nhr-155	C14C6.4	1	2	4	44	23	19	0	1	0	5	2	1	3.83357	3.1836e-05			LINK	none available
WBGene00000252	bli-2	F59E12.12	12	167	152	1512	1415	1098	53	45	86	166	104	105	3.83124	0.000465884			LINK	A cuticle collagen involved in strut assembly in the adult cuticle.
WBGene00019421	K05F6.10	K05F6.10	3	3	0	15	34	22	3	3	4	29	23	31	3.83087	0.00018202	2.67433	6.71151e-05	LINK	none available
WBGene00004127	abu-12	F52D1.3	25	16	18	272	310	128	14	4	20	1	1	5	3.82495	8.49661e-18	-2.80042	0.00300982	LINK	The protein product of this gene is predicted to contain a glutamine/asparagine (Q/N)-rich ('prion') domain, by the algorithm of Michelitsch and Weissman (as of the WS77 release of WormBase, i.e., in wormpep77).
WBGene00010831	M02G9.2	M02G9.2	4	2	3	39	44	25	1	1	4	7	2	6	3.82102	5.36304e-07			LINK	none available
WBGene00000930	dao-4	ZC373.6	8	64	37	454	350	492	26	29	23	63	43	56	3.8161	1.3296e-11			LINK	dao-4 encodes a novel protein, conserved amongst nematodes; dao-4 transcripts are expressed at higher levels in wild-type adult animals than in daf-2 mutant adults at 25C, suggesting that dao-4 expression is positively regulated by DAF-2/insulin-like receptor signaling; reduced dao-4 expression in daf-2 mutants is dependent upon DAF-16.
WBGene00004120	pqn-32	F29C12.1a	78	60	33	752	874	394	34	20	38	9	4	6	3.8129	5.88772e-22	-2.6535	9.22622e-07	LINK	The protein product of this gene is predicted to contain a glutamine/asparagine (Q/N)-rich ('prion') domain, by the algorithm of Michelitsch and Weissman (as of the WS77 release of WormBase, i.e., in wormpep77).
WBGene00001725	grl-16	Y65B4BR.6a	244	409	270	4185	4609	2086	89	67	103	20	15	13	3.80364	4.5325e-30	-2.803	5.32824e-18	LINK	grl-16 encodes, by alternative splicing, two hedgehog-like proteins with an N-terminal signal sequence, a central proline-rich low-complexity region, and a C-terminal Ground-like (Grl) domain; the Grl domain is predicted to form a cysteine-crosslinked protein involved in intercellular signalling, and it has subtle similarity to the N-terminal Hedge domain of HEDGEHOG proteins.
WBGene00000626	col-49	K09H9.3	25	261	248	2504	2398	1465	93	91	112	107	74	105	3.80068	0.000256367			LINK	col-49 encodes a cuticle collagen.
WBGene00012942	Y47D3B.6	Y47D3B.6	31	46	47	608	616	245	4	8	6	2	2	5	3.79642	6.40958e-20			LINK	none available
WBGene00015458	C04G6.10	C04G6.10	0	4	1	18	30	10	0	3	2	0	0	1	3.79579	0.0015404			LINK	none available
WBGene00022274	Y73E7A.8	Y73E7A.8	31	10	7	193	277	87	13	13	14	3	5	3	3.78816	6.7746e-09	-2.22295	0.00355617	LINK	none available
WBGene00044109	K02E11.10	K02E11.10	98	64	47	920	1042	471	20	10	23	4	7	6	3.78631	2.50155e-23	-1.98729	0.0026222	LINK	none available
WBGene00022033	Y65B4BL.1	Y65B4BL.1a	16	3	2	105	99	40	5	12	23	6	0	9	3.78226	3.09506e-06	-1.82554	0.0348338	LINK	none available
WBGene00000034	abu-11	T01D1.6	4	33	28	278	328	145	4	3	7	5	4	3	3.76445	4.12785e-09			LINK	abu-11 encodes a transmembrane protein with a predicted signal sequence, a glutamine/asparagine-rich domain and multiple cysteine-rich repeats (DUF139); abu-11 expression is induced by blockage of the unfolded-protein response in the endoplasmic reticulum, and ABU-11 may help protect the organism from damage by improperly folded nascent protein.
WBGene00022649	ZK84.1	ZK84.1	77	166	140	1759	1720	891	139	101	119	6	7	4	3.74598	1.24996e-24	-4.77229	1.65907e-30	LINK	none available
WBGene00004174	abu-14	ZK1067.7	54	87	83	973	1130	429	19	24	28	16	15	18	3.73256	1.03196e-20			LINK	The protein product of this gene is predicted to contain a glutamine/asparagine (Q/N)-rich ('prion') domain, by the algorithm of Michelitsch and Weissman (as of the WS77 release of WormBase, i.e., in wormpep77).
WBGene00018055	F35F10.5	F35F10.5	6	1	0	24	21	33	13	11	6	4	6	0	3.72859	0.000272481	-1.93732	0.0388553	LINK	none available
WBGene00001074	dpy-13	F30B5.1	522	586	378	6653	6770	3166	142	95	100	14	18	16	3.72568	6.77764e-33	-3.18071	1.73797e-24	LINK	dpy-13 encodes a member of the collagen superfamily containing 20 copies of the collagen triple helix repeat; transcipt levels oscillate, peaking once during each larval stage.
WBGene00000683	col-109	Y38C1BA.3	109	308	188	2578	2768	1374	72	60	78	17	21	24	3.71882	3.49728e-20	-2.1272	2.71516e-11	LINK	col-109 encodes a cuticular collagen; loss of col-109 via large-scale RNAi screens results in no obvious defects.
WBGene00000625	col-48	Y54E10BL.2	63	216	151	1926	1815	1057	79	51	60	24	29	40	3.71836	5.08652e-18	-1.39927	1.37291e-05	LINK	col-48 encodes a cuticle collagen.
WBGene00007802	cutl-27	C29E6.4	2	0	0	4	10	8	3	2	0	2	5	2	3.71624	0.0400468			LINK	none available
WBGene00021627	Y47D7A.15	Y47D7A.15	47	827	672	6951	6901	3402	224	174	191	74	65	76	3.71089	0.00212228	-1.82954	1.4445e-23	LINK	none available
WBGene00019272	H42K12.3	H42K12.3	93	48	54	832	895	433	37	40	64	23	20	14	3.7059	8.81641e-23	-1.67218	1.46266e-05	LINK	none available
WBGene00015453	C04G6.2	C04G6.2	12	26	38	324	262	265	9	9	9	28	21	19	3.70579	2.73043e-21			LINK	none available
WBGene00000615	col-38	F54C9.4	52	657	441	4974	4952	2762	160	145	157	95	44	67	3.70284	0.000541582	-1.55847	1.2797e-13	LINK	col-38 encodes a member of the collagen superfamily containing collagen triple helix repeats (20 copies) required for normal body morphology.
WBGene00010673	K08E7.5	K08E7.5a	28	16	7	167	282	105	5	4	8	2	7	4	3.70057	9.38438e-11			LINK	none available
WBGene00077691	T06E4.14	T06E4.14	17	24	30	304	347	135	4	0	2	0	4	0	3.69678	9.76717e-16			LINK	none available
WBGene00011530	T06D8.10	T06D8.10	28	34	30	398	393	221	19	13	15	14	10	15	3.69535	1.95122e-28			LINK	none available
WBGene00015841	C16C8.2	C16C8.2	22	7	4	121	156	82	3	1	13	0	1	0	3.69467	1.88267e-09	-4.31434	0.0132714	LINK	none available
WBGene00000672	col-97	ZK1010.7	111	457	316	3604	3905	2061	137	114	126	66	65	52	3.67732	9.12242e-15	-1.41204	1.00026e-10	LINK	col-97 encodes a cuticular collagen; loss of col-97 activity via large-scale RNAi screens results in defects in body morphology and locomotion.
WBGene00010108	F55C10.4	F55C10.4	2	3	3	31	20	36	9	1	3	3	4	5	3.67698	6.67538e-06			LINK	none available
WBGene00007999	tag-297	C38C6.6	89	86	51	922	994	489	36	30	29	33	18	28	3.65902	3.82238e-27			LINK	none available
WBGene00000748	col-175	C35B8.1	28	474	360	3526	3328	2370	167	139	187	123	79	97	3.65362	0.00150247	-1.10185	1.94747e-09	LINK	none available
WBGene00015911	C17F4.3	C17F4.3	1	1	0	7	8	6	0	0	0	3	0	0	3.64369	0.0290551			LINK	none available
WBGene00000030	abu-7	C03A7.8	3	23	34	248	287	110	3	1	0	0	0	1	3.64055	5.48401e-07			LINK	abu-7 encodes a transmembrane protein with a predicted signal sequence, a glutamine/asparagine-rich domain and multiple cysteine-rich repeats (DUF139); abu-7 expression is induced by blockage of the unfolded-protein response in the endoplasmic reticulum, and ABU-7 may help protect the organism from damage by improperly folded nascent protein.
WBGene00235121			1	1	1	19	9	4	6	1	16	0	2	6	3.63572	0.0124336			LINK
WBGene00000649	col-73	F11G11.12	679	1086	840	11042	10703	5669	341	295	297	132	109	136	3.63323	1.7538e-34	-1.68658	3.415e-32	LINK	none available
WBGene00001067	dpy-5	F27C1.8	601	582	399	6327	7022	3162	128	142	160	39	34	37	3.62923	1.63244e-30	-2.34332	1.18677e-24	LINK	dpy-5 encodes a Group I cuticle procollagen; dpy-5 activity is required for wild-type body length, cuticle structure (width of the annuli), postembryonic growth rates, and reproduction; dpy-5 is described as an intermediate collagen gene, as its mRNA, which is present in all larval stages, adults, and dauer larvae, increases in abudance two hours prior to the secretion of each new cuticle; a dpy-…
WBGene00006952	wrt-6	ZK377.1	41	55	40	535	535	340	23	12	14	14	11	18	3.61431	3.46234e-37			LINK	wrt-6 encodes a hedgehog-like protein, with (from N- to C-terminus) a signal sequence, a Wart domain, an short region of low-complexity sequence, and a Hint/Hog domain; WRT-6 is expressed in sheath and socket cells of anterior sensilla, seam cells, and hypodermis; the Hint/Hog domain is predicted to cut WRT-6 into two halves and then covalently link cholesterol to the C-terminus of the Wart domai…
WBGene00018352	fbxc-20	F42G2.3	2	2	0	12	17	12	6	5	11	20	21	23	3.61396	0.0024351			LINK	none available
WBGene00000402	cdh-10	C45G7.5	24	22	24	263	341	117	9	15	6	2	6	3	3.60082	8.40212e-15	-1.80945	0.0411504	LINK	cdh-10 encodes a member of the cadherin superfamily.
WBGene00009411	F35E2.3	F35E2.3	0	2	2	14	18	9	0	0	1	1	0	0	3.59379	0.00327875			LINK	none available
WBGene00006950	wrt-4	ZK678.5	10	82	48	543	579	303	16	11	14	5	0	11	3.59264	5.24097e-09	-1.76919	0.0263944	LINK	wrt-4 encodes a hedgehog-like protein, with (from N- to C-terminus) a signal sequence, a Wart domain, an short region of low-complexity sequence, and a Hint/Hog domain; WRT-4 is expressed strongly in hypodermal syncytia hyp6-hyp10 from 3-fold embryos to adults; the Hint/Hog domain is predicted to cut WRT-4 into two halves and then covalently link cholesterol to the C-terminus of the Wart domain; …
WBGene00018176	F38B6.7	F38B6.7	2	0	1	15	12	4	2	2	2	2	7	6	3.59238	0.0163053			LINK	none available
WBGene00003841	ocr-4	Y40C5A.2	1	0	2	12	9	10	3	1	0	4	6	4	3.58715	0.00886687			LINK	ocr-4 encodes a transient receptor potential (TRP) channel; an ocr-4::gfp reporter fusion is expressed in the four mechanosensory OLQ neurons.
WBGene00019348	K02H11.4	K02H11.4	0	2	0	8	5	7	0	0	0	1	0	0	3.57804	0.0471182			LINK	none available
WBGene00000755	col-182	R09A8.4	19	15	17	212	191	114	8	3	8	6	5	14	3.57358	9.13343e-20			LINK	none available
WBGene00044011	T06E4.12	T06E4.12	10	35	18	212	271	144	8	3	3	0	0	0	3.56591	8.09034e-14	-5.03416	0.00392176	LINK	none available
WBGene00004133	abu-13	F57B9.9	77	50	40	593	678	394	35	35	52	35	21	42	3.5615	1.14863e-27			LINK	The protein product of this gene is predicted to contain a glutamine/asparagine (Q/N)-rich ('prion') domain, by the algorithm of Michelitsch and Weissman (as of the WS77 release of WormBase, i.e., in wormpep77).
WBGene00004992	spp-7	ZK616.9	5	2	1	26	44	9	1	4	8	14	15	13	3.55634	0.000767121			LINK	none available
WBGene00001541	gcy-15	ZC239.7	3	0	1	19	11	10	1	0	0	8	1	12	3.54715	0.00485044	3.85737	0.0267229	LINK	gcy-15 encodes a membrane guanylyl cyclase.
WBGene00000024	abu-1	AC3.3	2	39	40	284	389	134	3	3	1	0	1	0	3.54376	0.00507371			LINK	abu-1 encodes a transmembrane protein with a predicted signal sequence, a glutamine/asparagine-rich domain and multiple cysteine-rich repeats (DUF139); abu-1 expression is induced by blockage of the unfolded-protein response in the endoplasmic reticulum, and ABU-1 may help protect the organism from damage by improperly folded nascent protein.
WBGene00003534	nas-15	T04G9.2	18	14	8	134	189	68	2	6	1	0	2	0	3.53941	5.90143e-11			LINK	nas-15 encodes an astacin-like metalloprotease.
WBGene00020327	clec-21	T07H3.4	1	2	1	10	19	10	0	1	0	4	2	2	3.53676	0.00332463			LINK	none available
WBGene00235110			1	2	0	8	10	11	1	1	0	0	3	1	3.5315	0.011581			LINK
WBGene00008605	mlt-9	F09B12.1a	72	36	34	482	601	304	36	12	29	16	9	5	3.53146	3.58861e-19	-1.72929	0.00242836	LINK	none available
WBGene00014046	clec-60	ZK666.6	5	23	18	170	161	120	103	104	88	112	90	97	3.52932	2.24776e-13			LINK	clec-60 encodes a C-type lectin protein with no obvious non-nematode orthologs required for normal resistance to infection with Microbacterium nematophilum; clec-60 transcription is induced 6.6-fold by infection with M. nematophilum, making it one of the most strongly infection-responsive genes (second only to tts-1), while not being induced by other pathogens; CLEC-60 is expressed throughout the…
WBGene00020243	T05B4.12	T05B4.12	1	2	0	14	12	3	0	1	0	1	0	3	3.52462	0.0234812			LINK	none available
WBGene00007595	C15A7.2	C15A7.2	1	1	1	10	11	8	5	1	6	21	5	9	3.51142	0.00895931			LINK	none available
WBGene00010832	M02G9.3	M02G9.3	1	2	4	24	25	19	0	1	2	10	11	2	3.50821	8.79032e-05			LINK	none available
WBGene00009573	F40E10.5	F40E10.5	44	8	13	218	276	130	14	12	2	13	8	12	3.50492	2.67968e-08			LINK	none available
WBGene00010467	K01D12.8	K01D12.8	5	6	4	42	58	43	1	10	7	7	11	5	3.49859	5.49333e-09			LINK	none available
WBGene00018969	F56D3.1	F56D3.1	110	74	60	859	968	498	40	36	49	16	9	8	3.49545	3.90684e-25	-2.3013	8.82591e-08	LINK	none available
WBGene00255728			0	1	1	6	8	5	1	0	3	1	0	0	3.48583	0.0428524			LINK
WBGene00000031	abu-8	C03A7.14	10	37	34	310	341	121	4	5	9	1	0	1	3.48349	1.41274e-09	-3.5582	0.0172876	LINK	abu-8 encodes a transmembrane protein with a predicted signal sequence, a glutamine/asparagine-rich domain and multiple cysteine-rich repeats (DUF139); abu-8 expression is induced by blockage of the unfolded-protein response in the endoplasmic reticulum, and ABU-8 may help protect the organism from damage by improperly folded nascent protein.
WBGene00018619	F48G7.8	F48G7.8	6	8	4	52	62	55	14	6	6	12	12	7	3.47734	1.05344e-10			LINK	none available
WBGene00013788	Y116A8C.8	Y116A8C.8	0	2	1	6	12	10	3	0	0	2	0	4	3.47527	0.0164266			LINK	none available
WBGene00017438	F13H8.5	F13H8.5a	39	59	50	522	602	269	23	26	27	20	16	33	3.47268	5.07882e-21			LINK	F13H8.5 encodes a protein with a domain of unknown function (DB; IPR002602) that is found in several worm proteins, and a glutamine/asparagine-rich domain.
WBGene00005016	sqt-1	B0491.2	393	157	108	2253	2609	1257	41	45	43	27	27	37	3.46765	5.92698e-13			LINK	sqt-1 encodes a cuticle collagen; during larval and adult development, sqt-1 activity is required, likely redundantly, for normal cuticle, and hence organismal, morphology; sqt-1 mRNA abundance oscillates during larval development, peaking at one point during each larval stage and peaking again in adults; sqt-1 transcripts are also detected in animals at the L1-L2d molt; in the temporally distinc…
WBGene00022517	ZC123.1	ZC123.1	51	15	24	324	378	142	21	24	25	4	3	7	3.46413	2.39176e-10	-2.7063	1.02655e-05	LINK	none available
WBGene00020598	T20B6.2	T20B6.2	1	5	0	19	17	19	3	4	2	0	6	4	3.45892	0.00136539			LINK	none available
WBGene00018572	lin-42	F47F6.1a	104	84	64	903	1008	422	45	43	56	11	11	13	3.45361	7.22688e-21	-2.41241	1.64144e-09	LINK	lin-42 encodes three PAS domain-containing proteins orthologous to insect and vertebrate Period proteins that function in regulation of circadian rhythms; during larval development, lin-42 functions in the heterochronic pathway to regulate developmental switches that occurs in multiple tissues, including the hypodermis, gonad, sex myoblasts, and vulva; genetic analysis suggests that, in the hypod…
WBGene00004104	pqn-13	C14C11.8a	21	9	16	145	205	77	6	15	16	4	2	3	3.44837	1.15831e-10	-2.43091	0.00401899	LINK	The protein product of this gene is predicted to contain a glutamine/asparagine (Q/N)-rich ('prion') domain, by the algorithm of Michelitsch and Weissman (as of the WS77 release of WormBase, i.e., in wormpep77).
WBGene00000653	col-77	M195.1	127	736	542	5270	4774	2974	205	190	201	102	69	101	3.44678	1.92526e-05	-1.51579	9.50389e-19	LINK	col-77 encodes a cuticular collagen; as loss of col-77 activity via RNAi screens results in no obvious defects, the precise role of col-77 in C. elegans development and/or behavior is not yet known.
WBGene00007530	C11H1.5	C11H1.5	10	15	12	119	148	74	4	1	1	8	9	9	3.44526	9.88799e-14			LINK	none available
WBGene00007823	C30H6.5	C30H6.5a	11	14	16	154	135	90	15	8	8	23	27	26	3.43891	6.76626e-17			LINK	none available
WBGene00004903	snf-4	Y46G5A.25	1	7	3	35	35	30	9	0	3	6	3	8	3.43035	5.7129e-06			LINK	none available
WBGene00015103	B0280.7	B0280.7	15	6	13	108	140	64	7	6	4	9	12	10	3.42874	1.69847e-10			LINK	none available
WBGene00020017	R12A1.3	R12A1.3	5	10	16	107	129	50	8	4	0	0	1	0	3.42873	2.41579e-08	-3.8696	0.0439033	LINK	none available
WBGene00020670	T22B2.6	T22B2.6	3	5	5	51	53	15	0	1	0	1	2	1	3.42622	2.97251e-05			LINK	none available
WBGene00000893	cyn-17	ZC250.1a	19	6	9	97	148	64	5	11	16	27	21	29	3.42557	4.66709e-09			LINK	none available
WBGene00012261	lpr-3	W04G3.8	197	74	50	1093	1342	450	53	61	49	19	14	12	3.41888	1.32565e-09	-2.24159	1.61461e-09	LINK	lpr-3 encodes one of seven C. elegans proteins related to the lipocalin family of structurally related, low molecular weight, secreted proteins that bind and transport lipophilic molecules and participate in intercellular signaling; large-scale RNAi experiments indicate that lpr-3 activity is required for normal growth rates, early larval development, and coordinated locomotion.
WBGene00008905	F17B5.1	F17B5.1a	12	3	4	61	46	65	0	0	0	2	0	1	3.41562	3.89187e-08			LINK	none available
WBGene00002983	lgx-1	C54G7.3a	25	14	22	184	272	94	3	8	17	5	1	3	3.4067	1.94067e-11	-2.03142	0.0395161	LINK	lgx-1 encodes a polysaccharide deacetylase.
WBGene00007325	C05C9.1	C05C9.1	9	1	0	24	36	28	2	1	3	11	15	10	3.39654	0.00169271	2.24183	0.0218638	LINK	none available
WBGene00004398	rol-8	ZK1290.3a	372	134	103	2071	2286	1028	42	27	27	29	13	20	3.3922	2.08128e-11	-1.02538	0.0192691	LINK	rol-8 encodes a collagen that is enriched in dauer larvae; mutations cause adults to become left-handed rollers.
WBGene00017998	F33D4.6	F33D4.6a	127	103	91	973	1208	660	46	25	34	70	54	44	3.38807	5.90459e-33			LINK	none available
WBGene00000734	col-161	C50B6.4	61	670	446	4160	3836	2304	203	141	220	115	70	102	3.36769	0.00104634	-1.3544	7.74961e-13	LINK	none available
WBGene00020141	T01C4.1	T01C4.1	5	1	4	33	47	8	6	0	2	5	3	9	3.36482	0.00118664			LINK	none available
WBGene00000730	col-157	T11F9.9	31	180	128	1202	1120	638	40	34	42	20	17	25	3.36266	1.41274e-09	-1.28044	0.000831818	LINK	none available
WBGene00022079	Y69A2AR.8	Y69A2AR.8a	0	12	3	41	53	34	9	16	10	7	7	12	3.35847	0.000328126			LINK	none available
WBGene00021641	Y47G6A.15	Y47G6A.15	55	430	363	2864	2953	1544	280	240	290	191	144	153	3.34879	0.000443332	-1.10816	2.94903e-15	LINK	none available
WBGene00000603	col-14	C46A5.3a	189	542	448	3948	3841	2341	142	147	146	115	89	108	3.33682	3.53778e-17			LINK	col-14 encodes a collagen protein that affects vulval morphology in a large-scale RNAi screen; mRNA expressed in embryos and transcript levels peak during each larval stage.
WBGene00016915	C54D2.1	C54D2.1	2	6	12	54	75	44	0	2	2	0	11	3	3.33586	9.76362e-07			LINK	none available
WBGene00007169	B0393.4	B0393.4	11	15	10	92	139	74	14	18	23	5	4	4	3.33045	1.18564e-12	-2.45647	0.000241335	LINK	none available
WBGene00007479	C09F9.2	C09F9.2	53	56	25	405	537	185	31	46	43	5	3	9	3.3284	1.29799e-12	-3.20965	6.0198e-10	LINK	none available
WBGene00009859	clec-33	F49A5.7	1	4	2	23	21	15	1	0	4	18	9	11	3.31652	0.00036371	2.55122	0.0147435	LINK	none available
WBGene00015300	C01F1.5	C01F1.5	21	10	22	165	183	102	3	3	6	4	6	11	3.31182	1.28794e-13			LINK	none available
WBGene00044163	F49C5.11	F49C5.11a	25	14	12	145	161	122	6	19	4	11	15	14	3.31126	2.65415e-18			LINK	none available
WBGene00006948	wrt-2	F52E4.6	70	20	18	368	383	151	12	20	13	16	5	11	3.30578	5.21316e-08			LINK	wrt-2 encodes a hedgehog-like protein, with an N-terminal signal sequence, a Wart domain, and a C-terminal region of low-complexity sequence; WRT-2 is expressed in seam cells and hypodermal syncytia; the Wart domain is predicted to form a cysteine-crosslinked protein involved in intercellular signalling, and it has subtle similarity to the N-terminal Hedge domain of HEDGEHOG proteins; WRT-2 is we…
WBGene00000082	adt-1	C02B4.1	18	9	10	103	146	60	8	4	8	5	1	2	3.30384	9.6253e-10			LINK	The adt-1 gene encodes a metalloproteinase with disintegrin-like and metalloproteinase with thrombospondin type I motifs (ADAMTS) that is required for male tail morphogenesis.
WBGene00020281	T06A4.1	T06A4.1a	8	5	2	56	53	16	6	1	7	4	4	1	3.30361	6.99298e-05			LINK	none available
WBGene00000684	col-110	F19C7.7	14	89	57	474	523	337	75	75	77	83	73	88	3.3035	2.64643e-09			LINK	none available
WBGene00019112	F59E11.6	F59E11.6	1	2	2	9	18	14	0	0	0	2	1	4	3.28101	0.00320333			LINK	none available
WBGene00000678	col-104	F58F6.1	152	361	325	2606	2562	1711	119	118	114	114	74	81	3.26942	7.94973e-21			LINK	none available
WBGene00008092	gmeb-3	C44F1.2	1	3	5	33	22	19	2	2	5	6	2	4	3.25969	0.000152978			LINK	none available
WBGene00000735	col-162	Y2H9A.3	70	528	380	3218	2824	1904	204	190	214	141	107	121	3.25745	0.000278097	-1.09931	3.42848e-12	LINK	none available
WBGene00012256	lpr-5	W04G3.2	139	52	40	659	841	354	33	46	26	11	19	15	3.25448	3.43168e-10	-1.59258	0.000448143	LINK	lpr-5 encodes one of seven C. elegans proteins related to the lipocalin family of structurally related, low molecular weight, secreted proteins that bind and transport lipophilic molecules and participate in intercellular signaling; loss of lpr-5 function via RNAi results in defects in locomotion, body morphology, larval lethality, and yolk endocytosis; lpr-5 appears to be expressed in the hypode…
WBGene00020326	math-38	T07H3.3	10	12	6	87	59	79	25	25	38	94	50	59	3.2471	3.14701e-12			LINK	none available
WBGene00017991	clec-180	F32E10.3	66	51	36	393	548	279	25	24	26	143	100	103	3.24434	6.36957e-20	1.82415	8.12623e-11	LINK	none available
WBGene00015546	C06G1.2	C06G1.2	5	8	9	57	83	36	2	3	4	3	4	12	3.23736	1.38889e-07			LINK	none available
WBGene00001716	grl-7	T02E9.2a	138	66	59	801	887	406	31	29	30	22	12	14	3.23575	2.56586e-14	-1.29526	0.00341667	LINK	grl-7 encodes a hedgehog-like protein, with an N-terminal signal sequence, a central low-complexity region, and a C-terminal Ground-like (Grl) domain; GRL-7 is expressed in intestine, hypodermis, and seam cells; the Grl domain is predicted to form a cysteine-crosslinked protein involved in intercellular signalling, and it has subtle similarity to the N-terminal Hedge domain of HEDGEHOG proteins.
WBGene00000749	col-176	ZC373.7	65	152	81	854	995	505	55	46	65	65	34	73	3.23261	2.94022e-17			LINK	none available
WBGene00007869	C32H11.6	C32H11.6	7	1	0	21	26	16	1	0	0	0	1	1	3.23143	0.00408136			LINK	none available
WBGene00000033	abu-10	F35A5.3	10	18	27	157	194	88	4	2	0	1	0	0	3.22126	3.07786e-10			LINK	abu-10 encodes a transmembrane protein with a predicted signal sequence, a glutamine/asparagine-rich domain and a cysteine-rich repeat (DUF139); abu-10 expression is induced by blockage of the unfolded-protein response in the endoplasmic reticulum (ER), and ABU-10 may function within the ER to protect the organism from damage by improperly folded nascent protein.
WBGene00302974			86	43	45	465	649	253	45	45	41	18	20	8	3.21678	3.30466e-13	-1.87561	5.20695e-06	LINK
WBGene00000663	col-88	W05G11.3	23	517	389	2879	2733	1697	143	117	147	156	117	138	3.20955	0.0111735			LINK	none available
WBGene00000704	col-130	F08G5.4	72	190	140	1281	1225	643	37	46	50	27	16	8	3.2067	1.98181e-15	-1.7663	2.15934e-05	LINK	none available
WBGene00000725	col-152	F32G8.5	1	13	15	82	73	74	8	8	5	18	18	31	3.20603	2.38978e-06	1.29001	0.0397625	LINK	none available
WBGene00005017	sqt-2	C01B12.1	478	180	125	2307	2479	1287	41	51	51	25	13	19	3.20473	8.04506e-11	-1.71838	3.18844e-06	LINK	sqt-2 encodes a collagen required for normal alae formation and body morphology; sqt-2 mutants exhibit a slightly dumpy phenotype and the bodies of mutants are helically twisted.
WBGene00005018	sqt-3	F23H12.4a	1076	555	378	5810	6669	2987	581	492	553	120	111	120	3.19394	9.0172e-14	-2.5863	1.55819e-96	LINK	sqt-3 encodes a cuticle collagen; during development, sqt-3 activity is essential for viability and normal body morphology; genetic and expression studies indicate that SQT-3 is a cuticle component at all stages of development and that SQT-3 likely forms higher order cuticular structures with the DPY-17 cuticular collagen, both of which are candidate substrates for the DPY-31 procollagen C-protei…
WBGene00011103	R07E3.2	R07E3.2	6	10	2	52	60	25	10	5	5	2	8	7	3.18508	1.33728e-05			LINK	none available
WBGene00011535	T06E4.8	T06E4.8	8	35	32	223	240	117	2	4	2	1	1	0	3.18255	1.36961e-08			LINK	none available
WBGene00017214	F07E5.9	F07E5.9	2	3	1	17	12	17	0	0	0	20	17	14	3.18246	0.00154474	6.1571	1.06405e-05	LINK	none available
WBGene00008906	oac-17	F17B5.2	1	0	2	4	13	6	2	1	1	4	4	3	3.16811	0.0486244			LINK	none available
WBGene00001695	grd-6	T18H9.1	41	66	66	529	555	237	25	16	14	5	1	8	3.1637	4.09683e-15	-2.37668	0.000619655	LINK	grd-6 encodes a hedgehog-like protein, with an N-terminal signal sequence, a central low-complexity proline-rich domain, and a C-terminal Ground domain; GRD-6 is expressed in hypodermis and in various neurons, in both head and tail, and the PVT interneuron; the Ground domain is predicted to form a cysteine-crosslinked protein involved in intercellular signalling, and it has subtle similarity to t…
WBGene00020554	T19A5.3	T19A5.3a	71	43	41	406	528	237	22	25	32	41	32	32	3.15992	7.32711e-16			LINK	none available
WBGene00020702	T22F7.3	T22F7.3	7	20	7	97	121	36	10	1	9	5	4	1	3.1578	4.12694e-06			LINK	none available
WBGene00000645	col-69	K01A2.7	3	7	3	29	39	29	4	1	3	13	12	11	3.14948	8.14519e-06	1.8085	0.0489095	LINK	none available
WBGene00001070	dpy-8	C31H2.2	143	55	44	670	828	304	16	14	10	7	14	15	3.14448	3.68859e-09			LINK	dpy-8 encodes a collagen with a nematode-specific N-terminal domain that is required for normal body morphology and (perhaps) for a normal embryonic cell division rate; dpy-8 interacts genetically with emb-5 and glp-1.
WBGene00018573	oac-30	F47F6.3	1	6	2	27	26	14	0	0	0	2	0	0	3.14406	0.000692866			LINK	none available
WBGene00010948	M195.2	M195.2a	6	10	7	70	69	33	3	4	0	3	2	5	3.14116	1.26248e-07			LINK	none available
WBGene00044538	T09D3.8	T09D3.8	2	5	3	35	19	21	1	1	3	4	0	0	3.14	0.000121075			LINK	none available
WBGene00002282	let-4	C44H4.2	18	20	17	153	198	59	14	18	24	9	6	17	3.13865	5.75614e-09	-1.194	0.0446315	LINK	let-4 encodes an extracellular leucine-rich repeat only protein; let-4 was originally identified in a screen for essential genes, and let-4 mutants exhibit early larval lethality; let-4 is required for organization of the apical extracellular matrix, and is involved in excretory cell canal morphology and renal function as mutants exhibit excretory canal cysts and impaired renal function.
WBGene00000613	col-36	C27H5.5	2	3	2	15	19	18	0	0	3	0	1	0	3.13774	0.000647663			LINK	col-36 encodes a collagen protein; expressed during the L1 to L2 and L2 to dauer larval stage molts.
WBGene00009983	cut-2	F53F1.5	559	157	115	2173	2872	1063	153	91	107	36	24	46	3.13107	0.00051237	-2.10984	5.33545e-15	LINK	cut-2 encodes a secreted protein which is a component of cuticlin, the insoluble residue of nematode cuticles; CUT-2 is expressed during all developmental stages and contributes to the external cortical layer of the cuticle of all larval stages.
WBGene00013049	Y50E8A.6	Y50E8A.6	0	2	4	16	19	10	0	1	2	2	0	4	3.12814	0.00616413			LINK	Y50E8A.6 encodes a putative mitochondrial glycerol-3-phosphate dehydrogenase, paralogous to T25G3.4 and orthologous to human GPD2 (OMIM:138430, mutated in type II diabetes mellitus); Y50E8A.6 has no obvious function in mass RNAi assays.
WBGene00012690	Y39B6A.31	Y39B6A.31	2	5	4	17	31	33	6	4	10	9	5	4	3.12808	0.000106957			LINK	none available
WBGene00003525	nas-6	4R79.1a	5	3	3	21	33	27	3	0	0	6	3	7	3.12559	4.04737e-05			LINK	nas-6 encodes an astacin-like metalloprotease.
WBGene00006954	wrt-8	C29F3.2	15	6	7	71	72	61	6	4	2	35	14	31	3.10376	4.84698e-10	2.32733	0.000612613	LINK	wrt-8 encodes a hedgehog-like protein, with (from N- to C-terminus) a signal sequence, a Wart domain, an short region of low-complexity sequence, and a Hint/Hog domain; WRT-8 is strongly expressed in hypodermal syncytia hyp6-hyp10 throughout life, and in in 12 subventral P cells and their descendants from 3-fold embryo to L2 larva stages; the Hint/Hog domain is predicted to cut WRT-8 into two hal…
WBGene00021690	Y48G8AL.12	Y48G8AL.12	45	200	154	1067	1156	680	79	54	65	41	21	24	3.10039	5.19956e-10	-1.58933	5.75482e-07	LINK	none available
WBGene00000699	col-125	C29F4.1	634	1054	822	7428	7285	3543	332	238	309	94	81	77	3.09975	2.17266e-21	-2.17369	5.55342e-40	LINK	none available
WBGene00000606	col-17	F11G11.10	870	246	196	3636	4082	1735	98	83	102	37	15	32	3.09794	0.000281254	-2.14339	3.61998e-14	LINK	col-17 encodes a collagen which is expressed in all developmental stages except eggs, like col-15, col-16, and col-20; collagen genes with this expression pattern may be used for synthesis of cuticles after the L1 stage (e.g., the L4 cuticle).
WBGene00195068	Y48G8AL.16	Y48G8AL.16	7	8	8	63	61	43	7	2	5	4	3	4	3.0956	1.9835e-09			LINK	none available
WBGene00013943	ZK218.11	ZK218.11	6	2	0	25	29	3	1	0	4	0	0	0	3.08958	0.0279941			LINK	none available
WBGene00018591	npax-2	F48B9.5	2	2	3	24	23	4	5	0	7	6	3	6	3.08915	0.00764597			LINK	none available
WBGene00022816	fbn-1	ZK783.1a	63	25	36	287	447	157	45	46	46	64	72	68	3.08469	1.46966e-09			LINK	fbn-1 encodes a protein homologous to the human extracellular matrix protein fibrillin-1 (FBN1) which when mutated leads to Marfan syndrome (OMIM:154700), a connective tissue disorder; in C. elegans, fbn-1 activity is required for completion of molting, particularly the L3/L4 or L4/Adult molts.
WBGene00017068	D2092.8	D2092.8	12	13	6	85	92	43	2	3	8	0	4	4	3.07432	2.43921e-08			LINK	none available
WBGene00003807	npr-1	C39E6.6	3	1	0	4	11	13	1	2	2	11	7	13	3.07364	0.0372878	2.24014	0.0354535	LINK	npr-1 encodes a predicted G protein-coupled neuropeptide receptor that is homologous to the mammalian neuropeptide Y (NPY) receptor (OMIM:162641) required for regulating anxiety, food consumption, and pain sensation; in C. elegans, NPR-1 is involved in ethological variations of social behavior such as social versus solitary feeding; in regulating social behavior, NPR-1 functions as a receptor for…
WBGene00006955	wrt-9	B0344.2	17	11	24	136	158	79	9	15	9	8	8	8	3.06567	2.04923e-10			LINK	wrt-9 encodes a hedgehog-like protein, with an N-terminal signal sequence, a Wart domain, and a C-terminal region of proline-rich, low-complexity sequence; the Wart domain is predicted to form a cysteine-crosslinked protein involved in intercellular signalling, and it has subtle similarity to the N-terminal Hedge domain of HEDGEHOG proteins; WRT-9 has no obvious function in RNAi assays.
WBGene00004156	pqn-74	W02A2.3	36	110	78	581	710	294	4	11	11	1	2	2	3.06509	1.14968e-10	-2.74899	0.00990095	LINK	pqn-74 encodes a protein with two chitin-binding peritrophin-A domains, separated by a glutamine/asparagine (Q/N)-rich ('prion') domain; like CEJ-1 and CPG-2, PQN-74 might participate in eggshell synthesis and early embryonic development, and PQN-74's peritrophin-A domains might enable mechanical cross-linking of chitin.
WBGene00004139	pqn-54	R09B5.5	5	46	41	236	315	103	2	4	10	7	1	2	3.06296	4.47466e-05			LINK	The protein product of this gene is predicted to contain a glutamine/asparagine (Q/N)-rich ('prion') domain, by the algorithm of Michelitsch and Weissman (as of the WS77 release of WormBase, i.e., in wormpep77).
WBGene00010987	R03C1.1	R03C1.1a	8	7	21	93	114	52	1	6	2	2	1	3	3.05995	8.57324e-07			LINK	none available
WBGene00016732	phat-1	C46H11.8	5	5	9	50	66	19	0	3	2	1	1	0	3.05524	5.52288e-05			LINK	none available
WBGene00014777	F58A4.12	F58A4.12	0	1	4	15	8	13	1	1	3	3	3	2	3.05083	0.0180814			LINK	none available
WBGene00015339	C02E7.6	C02E7.6	183	129	79	956	1152	611	126	79	125	29	25	38	3.04885	1.44009e-17	-2.21389	2.36749e-16	LINK	none available
WBGene00000399	cdh-7	R05H10.6	34	15	9	158	182	63	3	5	5	1	4	4	3.04528	1.14205e-06			LINK	cdh-7 encodes a protein that contains a cadherin domain.
WBGene00000641	col-65	K08C9.4	112	116	95	869	914	472	35	55	35	34	16	38	3.04292	1.35875e-24			LINK	none available
WBGene00018418	F44E2.4	F44E2.4	80	79	56	530	644	312	50	63	61	40	37	49	3.03462	5.37425e-20			LINK	none available
WBGene00000681	col-107	C34H4.4a	587	473	290	3625	3746	1924	143	132	158	108	82	87	3.03156	1.05599e-19	-1.02182	5.17288e-08	LINK	none available
WBGene00044621	bus-5	not known	166	44	65	675	827	381	35	34	52	35	32	37	3.01478	1.06389e-08			LINK	bus-5 is an uncloned gene required for colonization by Microbacterium nematophilum, the tail-swelling response to M. nematophilum infection, and for fully normal cuticle antigens and traction during movement; bus-5 is also strongly required for cuticle integrity and for long-term survival during starvation.
WBGene00004017	phg-1	F27E5.4	26	5	16	102	150	71	6	8	6	31	31	41	3.01238	1.56354e-06	1.98692	0.000205693	LINK	none available
WBGene00018487	F46C8.8	F46C8.8	54	40	21	274	342	163	11	13	21	20	17	12	3.01233	2.74261e-12			LINK	none available
WBGene00001065	dpy-3	EGAP7.1	130	41	35	514	642	243	52	38	42	15	17	19	3.0119	2.15348e-07	-1.7419	5.54012e-06	LINK	dpy-3 encodes a cuticular collagen; along with dpy-2, dpy-7, dpy-8, and dpy-10, dpy-3 is required postembryonically for annular furrow formation and/or maintenance; specifically, DPY-3 activity is required for proper assembly of the DPY-7 collagen into the mature extracellular matrix; during each cuticle synthetic period, dpy-3 mRNA is expressed approximately four hours prior to the secretion of …
WBGene00008559	F07H5.8	F07H5.8	10	10	9	54	102	41	4	4	2	5	10	3	3.01104	3.70885e-07			LINK	none available
WBGene00000727	col-154	F55C10.2	153	409	273	2344	2195	1160	65	77	71	44	34	42	3.01085	5.8038e-14	-1.21128	1.27117e-05	LINK	none available
WBGene00018297	F41F3.3	F41F3.3	1501	703	513	7135	7643	3628	259	220	287	133	112	119	3.0073	5.98767e-12	-1.44644	8.15868e-22	LINK	none available
WBGene00010754	K10G4.5	K10G4.5	4	4	7	30	34	38	6	2	2	54	55	42	2.99852	4.69845e-06	3.5538	3.46894e-09	LINK	none available
WBGene00000746	col-173	F41C6.5	43	18	24	212	226	138	11	9	15	9	12	10	2.9961	4.70561e-13			LINK	none available
WBGene00012271	W05B2.2	W05B2.2	3	0	1	9	10	8	1	4	7	1	6	4	2.99027	0.0294723			LINK	none available
WBGene00022616	hsd-3	ZC449.6	3	0	1	8	5	14	5	0	0	3	1	0	2.98855	0.0412834			LINK	none available
WBGene00003888	osm-8	R07G3.6	19	4	13	103	86	55	7	1	9	23	16	20	2.98254	7.36514e-07	1.43041	0.0419186	LINK	osm-8 encodes a mucin-like secreted protein with a PST (proline/serine/threonine) domain similar to the PST domain in human mucin, Muc2; osm-8 is a negative regulator of the osmotic stress response, mutants for osm-8 show inappropriate activation of physiological responses to osmotic stress; osm-8 acts through the hypodermally expressed transmembrane protein PTR-23 to activate osmosensitive gene …
WBGene00015646	mlt-10	C09E8.3	144	164	137	1048	1375	544	71	82	69	44	35	40	2.97929	1.94508e-17	-1.28326	3.24121e-06	LINK	mlt-10 encodes a nematode-specific protein that contains a domain of unknown function, DUF644, and tandem proline- and hydroxy amino acid-rich repeats; mlt-10 is required for proper execution of the molting cycle, as well as a number of other processes including normal body shape, locomotion, and reproduction; MLT-10 is expressed transiently with each molting cycle in the hypodermis, except for t…
WBGene00050875	bah-1	ZK1025.7	17	1	4	57	74	16	1	0	0	2	2	12	2.97915	0.00435587			LINK	bah-1 encodes a protein with a DUF23 domain, a domain found in insects, plants, bacteria and two vertebrates, the frog and the fish, Tetraodon, but absent from mammalian genomes; bah-1 normally functions to contribute to the integrity of the nematode cuticle; bah-1 is also required for the surface characteristics of the elegans cuticle that are required for the binding of bacterial biofilms; bah-…
WBGene00011468	T05C12.4	T05C12.4	1	6	4	22	41	10	5	2	5	16	18	19	2.97888	0.00303373	1.78503	0.0158893	LINK	none available
WBGene00014728	E03A3.1	E03A3.1	4	4	1	12	32	15	4	0	4	3	0	6	2.978	0.00254145			LINK	none available
WBGene00015616	C08G5.3	C08G5.3a	1	4	4	23	21	16	2	3	0	2	3	2	2.96942	0.000662569			LINK	none available
WBGene00044663	F26G1.10	F26G1.10	3	1	1	10	13	10	2	1	1	2	2	0	2.96625	0.0109325			LINK	none available
WBGene00021625	Y47D7A.13	Y47D7A.13	566	528	415	3751	4380	1823	119	127	144	32	29	38	2.96457	2.88291e-19	-2.35482	1.07414e-22	LINK	none available
WBGene00017705	F22E5.6	F22E5.6	0	3	8	26	24	24	4	3	0	16	11	23	2.95863	0.00251993	2.43553	0.00593822	LINK	none available
WBGene00007938	C34F6.1	C34F6.1	25	17	15	136	159	79	6	7	1	13	13	11	2.95503	2.14009e-11			LINK	none available
WBGene00006366	sym-1	C44H4.3	252	156	148	1246	1687	709	120	97	130	64	50	51	2.95502	2.29366e-15	-1.44644	1.02895e-10	LINK	sym-1 encodes a protein containing 15 contiguous leucine-rich repeats (LRRs) that functionally overlaps with sym-5 and interacts with mec-8 with respect to embryonic viability and attachment of body muscle to the extracellular cuticle; expression begins at the time of embryonic elongation and SYM-1 is secreted from the apical hypodermal surface of the embryo; microarray analyses indicate that sym…
WBGene00000659	col-84	K12D12.3	1	2	2	14	11	8	3	5	1	0	1	1	2.9537	0.0104252			LINK	col-84 encodes a nematode cuticular collagen; RNAi experiments that target col-84 (as well as neighboring genes) result in defects in embryonic and larval development, body morphology, and reproduction.
WBGene00020803	T25E4.1	T25E4.1	32	29	34	233	245	143	5	5	5	4	3	2	2.94144	6.54815e-18			LINK	none available
WBGene00000610	col-33	F36A4.6	11	3	5	51	43	30	3	2	3	1	3	1	2.93854	1.23978e-05			LINK	col-33 encodes a predicted cuticular collagen; by homology, col-33 is predicted to play a role in cuticle biosynthesis and regulation of body size and morphogenesis; however, as loss of col-33 activity via large-scale RNAi screens does not result in any obvious abnormalities, the precise role of COL-33 in C. elegans development and/or behavior is not yet known.
WBGene00011952	T23F6.5	T23F6.5	3	7	1	18	27	25	4	1	1	5	7	5	2.93358	0.000640641			LINK	none available
WBGene00000743	col-170	T10E10.6	99	264	132	1228	1303	641	55	49	39	8	9	12	2.93107	2.04473e-12	-2.68126	3.53725e-10	LINK	none available
WBGene00021791	Y51H7C.13	Y51H7C.13	55	353	251	1790	1760	704	257	235	264	96	53	53	2.92646	0.00162188	-2.28925	1.74004e-35	LINK	none available
WBGene00044623	bus-8	T23F2.1	84	31	28	319	411	186	25	19	28	13	14	15	2.92623	1.36674e-08	-1.14291	0.0198336	LINK	bus-8 encodes a glycosyltransferase related to mannosyltransferases that play a role in protein N-linked glycosylation ; bus-8 is required for colonization by Microbacterium nematophilum and the tail-swelling response to M. nematophilum infection; bus-8 is also essential for enclosure during embryonic morphogenesis, functioning in or with ephrin-mediated signaling to effect the proper neuroblast …
WBGene00007251	nspb-9	C01G12.11	1	7	3	21	31	18	0	2	1	3	2	3	2.92276	0.000921255			LINK	none available
WBGene00022287	Y75B7AR.1	Y75B7AR.1	64	30	26	269	344	154	10	5	8	9	7	4	2.92188	4.86032e-10			LINK	none available
WBGene00001714	grl-5	Y47D7A.5	139	79	34	582	646	370	24	26	20	75	52	53	2.92108	7.62166e-10			LINK	grl-5 encodes a hedgehog-like protein, with an N-terminal signal sequence, a central proline-rich low-complexity region, and a C-terminal Ground-like (Grl) domain; the Grl domain is predicted to form a cysteine-crosslinked protein involved in intercellular signalling, and it has subtle similarity to the N-terminal Hedge domain of HEDGEHOG proteins.
WBGene00017520	F16G10.5	F16G10.5	0	3	2	11	11	10	0	1	0	2	2	2	2.91803	0.0170454			LINK	none available
WBGene00011537	T06E4.10	T06E4.10	11	13	13	89	111	37	2	0	0	0	2	0	2.91564	5.57328e-07			LINK	T06E4.10 encodes an uncharacterized protein that is proline- and alanine-rich and contains a predicted signal sequence; as loss of T06E4.10 results in no obvious defects, the precise role of its gene product in C. elegans development and/or behavior is not yet known.
WBGene00010355	clec-229	H02K04.1	2	6	3	26	25	19	0	1	3	3	0	1	2.91306	0.000236561			LINK	none available
WBGene00022504	mam-1	ZC13.3	15	3	6	59	65	29	3	3	4	15	11	8	2.90723	7.59958e-05			LINK	none available
WBGene00015340	C02E7.7	C02E7.7	162	156	94	896	1055	646	133	99	106	73	62	56	2.90615	5.6038e-25	-1.19748	1.29085e-07	LINK	none available
WBGene00009926	noah-2	F52B11.3	259	186	144	1379	1647	686	178	153	184	55	42	49	2.90086	5.1046e-15	-2.19581	9.74704e-28	LINK	noah-2 encodes a PAN and ZP domain-containing protein that is related to the Drosophila extracellular matrix component NompA (no-mechanoreceptor-potential A); loss of noah-2 function via RNAi indicates that NOAH-2 activity is essential for molting; in addition, NOAH-2 appears to be required for embryonic and larval development, reproduction, coordinated locomotion, and the overall health of the a…
WBGene00015421	C04E6.4	C04E6.4	0	6	7	16	36	30	10	6	3	10	8	17	2.89512	0.00339673			LINK	none available
WBGene00011294	R102.7	R102.7	1	1	4	8	16	14	9	3	7	5	0	5	2.8893	0.0124345			LINK	none available
WBGene00012679	Y39B6A.18	Y39B6A.18	6	5	6	40	41	26	16	1	12	18	18	20	2.88854	5.02021e-06			LINK	none available
WBGene00019912	R06B10.1	R06B10.1	8	17	14	73	102	69	16	15	21	39	30	35	2.88797	6.10471e-10			LINK	none available
WBGene00011619	T08G3.7	T08G3.7	0	9	7	29	38	33	3	2	3	23	14	12	2.88483	0.000946176	2.23266	0.00746796	LINK	none available
WBGene00008010	C38D9.2	C38D9.2	8	2	5	49	21	25	7	8	10	18	21	20	2.88076	0.000295322			LINK	none available
WBGene00001690	grd-1	R08B4.1a	45	37	20	241	247	144	6	15	15	31	31	27	2.8788	8.45208e-14			LINK	grd-1 encodes a hedgehog-like protein, with (from N- to C-terminus) a signal sequence, a Ground domain, an extended region of low-complexity sequence, and a Hint/Hog domain; GRD-1 is expressed in rectal cells; the Hint/Hog domain is predicted to cut GRD-1 into two halves and then covalently link cholesterol to the C-terminus of the Ground domain; the Ground domain is predicted to form a cysteine-…
WBGene00012257	lpr-4	W04G3.3	192	65	51	707	784	414	49	34	39	43	34	38	2.87687	3.54053e-08			LINK	lpr-4 encodes one of seven C. elegans proteins related to the lipocalin family of structurally related, low molecular weight, secreted proteins that bind and transport lipophilic molecules and participate in intercellular signaling; loss of lpr-4 via RNAi has been reported to result in defective yolk endocytosis; lpr-4 appears to be expressed in body wall muscle.
WBGene00008376	D1054.9	D1054.9a	33	20	26	183	207	103	11	6	9	17	9	32	2.87539	4.2501e-12			LINK	none available
WBGene00017392	basl-2	F12A10.3a	0	5	3	7	17	25	8	10	2	20	10	6	2.87081	0.0172635			LINK	none available
WBGene00000027	abu-4	Y5H2A.3	2	8	5	41	34	18	2	0	1	1	0	0	2.86889	0.000232572			LINK	abu-4 encodes a transmembrane protein with a predicted signal sequence, a glutamine/asparagine-rich domain and multiple cysteine-rich repeats (DUF139); abu-4 expression is induced by blockage of the unfolded-protein response in the endoplasmic reticulum (ER), and ABU-4 may function within the ER to protect the organism from damage by improperly folded nascent protein; abu-4 expression is enhanced…
WBGene00000694	col-120	Y11D7A.11	36	413	311	1730	1618	1339	248	219	253	264	264	265	2.85987	0.00593357			LINK	none available
WBGene00020560	T19C3.2	T19C3.2	75	71	48	462	388	340	33	24	22	51	53	65	2.85765	3.23764e-33			LINK	none available
WBGene00000718	col-145	B0222.7	25	625	449	2687	2630	1445	96	106	117	29	15	12	2.8568	0.0306984	-2.89529	1.10392e-21	LINK	none available
WBGene00019148	H03E18.1	H03E18.1	78	71	48	413	547	239	26	33	23	18	22	34	2.85404	2.29057e-14			LINK	none available
WBGene00000979	dhs-16	C10F3.2	10	3	2	27	40	24	1	3	3	20	17	22	2.85157	0.00041709	2.69554	0.000899457	LINK	dhs-16 encodes a short-chain dehydrogenase predicted to be mitochondrial.
WBGene00013452	Y67A10A.3	Y67A10A.3a	1	13	11	61	51	41	11	22	23	21	18	31	2.8444	0.000106858			LINK	none available
WBGene00020648	T21D12.7	T21D12.7	0	3	1	6	10	8	2	4	2	3	2	4	2.84272	0.0490462			LINK	none available
WBGene00021095	mlt-8	W08F4.6	285	161	113	1251	1326	795	108	103	109	148	113	130	2.83995	1.05571e-14			LINK	mlt-8 encodes a novel protein; during development, mlt-8 activity is required for molting; a mlt-8::gfp reporter is expressed in hypodermal cells and in a single posterior neuron.
WBGene00007996	C38C6.3	C38C6.3	21	9	11	78	109	61	5	3	6	15	11	16	2.83832	3.58563e-08			LINK	none available
WBGene00022085	Y69A2AR.14	Y69A2AR.14	2	9	6	42	31	30	9	12	14	7	6	4	2.83517	3.81954e-05			LINK	none available
WBGene00003057	lon-3	ZK836.1	354	185	116	1468	1452	997	63	58	44	143	130	105	2.8294	6.08927e-13			LINK	lon-3 encodes a cuticle collagen; during development, lon-3 acts downstream of the TGF-beta signaling pathway to specify body length; lon-3 reporter fusions are expressed in hypodermal cells and LON-3 appears to localize to the surface of the animal, consistent with a role in cuticle formation.
WBGene00020599	T20B6.3	T20B6.3	20	12	6	75	116	34	10	0	5	5	5	3	2.82097	3.83209e-05			LINK	none available
WBGene00000998	dig-1	K07E12.1a	72	59	84	415	515	362	47	52	53	91	59	111	2.819	1.11048e-24			LINK	dig-1 encodes a giant member of the immunoglobulin superfamily; dig-1 functions cell non-autonomously to mediate axon fasciculation and maintenance of cell body position within ganglia; dig-1 is also required for proper placement of the gonad; dig-1 is initially expressed in the developing embryonic gut and then expressed by a number of different muscle cells, including the body wall, head, vulva…
WBGene00010345	F59F5.7	F59F5.7	8	10	9	51	61	49	1	9	0	21	22	8	2.81645	8.92788e-09	1.95477	0.0352322	LINK	none available
WBGene00017351	cutl-5	F10E7.10	9	1	2	19	33	19	5	4	5	6	2	10	2.81277	0.00382658			LINK	none available
WBGene00018143	oac-23	F37C4.3	5	7	6	35	43	29	3	10	6	2	4	9	2.81216	5.21511e-06			LINK	none available
WBGene00016106	C25F6.7	C25F6.7a	55	33	28	231	288	168	25	22	19	41	31	37	2.81073	4.43094e-14			LINK	none available
WBGene00020039	R12E2.14	R12E2.14	88	57	42	382	434	284	25	39	25	44	31	63	2.80234	1.5306e-17			LINK	none available
WBGene00004155	pqn-73	W01C9.3a	3	4	2	22	23	8	8	12	11	25	9	24	2.80118	0.00382372			LINK	The protein product of this gene is predicted to contain a glutamine/asparagine (Q/N)-rich ('prion') domain, by the algorithm of Michelitsch and Weissman (as of the WS77 release of WormBase, i.e., in wormpep77).
WBGene00008186	best-11	C49A1.3	6	13	8	42	58	58	13	18	17	6	14	7	2.79709	2.02741e-07			LINK	none available
WBGene00016921	C54F6.3	C54F6.3	2	3	5	18	30	11	1	2	2	1	1	3	2.79323	0.00287342			LINK	none available
WBGene00020357	T08E11.1	T08E11.1	6	0	5	16	27	22	0	0	2	57	37	32	2.78997	0.00489151	5.59926	1.05337e-06	LINK	This gene encodes a protein containing an F-box, a motif predicted to mediate protein-protein interactions either with homologs of yeast Skp-1p or with other proteins; this gene's encoded protein also contains an FTH/DUF38 motif, which may also mediate protein-protein interaction.
WBGene00004219	ptr-4	C45B2.7	215	83	94	890	896	505	86	88	105	293	194	268	2.7851	5.60694e-11	1.05111	7.69233e-10	LINK	ptr-4 encodes a nematode-specific member of the sterol sensing domain (SSD) proteins, distantly paralogous to Drosophila PATCHED (PTC) and human PTCH (OMIM:601309, mutated in basal cell nevus syndrome); PTR-4 is strongly required for normal molting from L4 to adult stages male tail development (a role conserved in C. briggsae); PTR-4 is also required for normal endocytosis of yolk by oocytes, adu…
WBGene00011617	T08G3.4	T08G3.4	1	18	15	53	77	68	14	12	9	11	11	10	2.78254	0.00033087			LINK	none available
WBGene00023262	C54F6.2	C54F6.2	1	2	1	4	9	10	3	3	2	16	18	8	2.77898	0.0460061	2.03404	0.0215529	LINK	none available
WBGene00019839	R02F11.1	R02F11.1	115	50	41	458	503	227	39	20	14	25	25	29	2.77252	9.93011e-09			LINK	none available
WBGene00001079	dpy-20	T22B3.1	20	3	4	48	64	43	5	3	2	5	8	14	2.76871	0.000460132			LINK	dpy-20 encodes a BED zinc finger protein, with no known homologs outside of nematodes, that is required for normal body morphology.
WBGene00010267	lips-9	F58G1.5	37	20	16	159	160	101	3	2	11	22	11	13	2.76627	6.36297e-11			LINK	none available
WBGene00013849	ZC84.6	ZC84.6	12	7	1	37	61	15	0	3	1	1	3	6	2.76445	0.00357135			LINK	none available
WBGene00022789	lron-2	ZK682.5	15	24	15	110	126	73	8	15	5	2	14	6	2.76096	6.29242e-11			LINK	none available
WBGene00015630	C09B9.7	C09B9.7	0	13	10	43	54	35	8	8	6	1	1	4	2.7599	0.00228464	-2.26564	0.0353396	LINK	none available
WBGene00011235	suro-1	R11A5.7	154	106	86	724	801	454	44	52	53	247	167	216	2.75912	2.70284e-18	1.69385	8.90597e-17	LINK	none available
WBGene00022180	Y71H2AM.15	Y71H2AM.15a	27	14	26	136	177	73	25	17	21	6	8	3	2.75521	4.81563e-08	-2.24662	0.000260959	LINK	none available
WBGene00004149	trpl-5	T16A1.7	3	4	3	22	14	21	4	3	7	22	30	30	2.74704	0.000933817	2.19841	0.000498828	LINK	The protein product of this gene is predicted to contain a glutamine/asparagine (Q/N)-rich ('prion') domain, by the algorithm of Michelitsch and Weissman (as of the WS77 release of WormBase, i.e., in wormpep77).
WBGene00012008	T25B9.2	T25B9.2	5	5	1	24	18	20	0	0	3	6	5	3	2.7432	0.000970665			LINK	none available
WBGene00018829	F54E7.6	F54E7.6	2	4	1	10	17	12	0	0	2	3	6	2	2.7367	0.00955988			LINK	none available
WBGene00015645	lips-7	C09E8.2a	23	8	9	76	87	62	3	4	12	17	10	15	2.73334	2.74451e-07			LINK	none available
WBGene00005602	srj-14	C03G6.3	14	18	8	77	63	84	6	10	6	88	79	73	2.73178	4.48725e-10	3.07132	4.06527e-13	LINK	none available
WBGene00305980			3	5	4	14	25	28	15	12	10	69	34	58	2.72905	0.000765138	1.72204	4.53087e-05	LINK
WBGene00000039	acn-1	C42D8.5a	177	158	137	971	1081	562	58	65	75	132	102	117	2.70938	1.03196e-20			LINK	acn-1 encodes an ACE-like protein required for larval development and adult morphogenesis, and probably for cell fusion in larval seam cells; ACN-1 lacks not only the HExxH consensus metallopeptidase motif, but also other active site residues found in the sequence HEAI/VxD of mammalian and insect ACEs; acn-1 is expressed in hypodermal cells, vulval precursor cells, and ray papillae in the male ta…
WBGene00008640	F10B5.3	F10B5.3	2	10	5	40	34	20	4	5	3	10	3	7	2.70894	0.00044193			LINK	none available
WBGene00000623	col-46	Y18H1A.13	25	12	11	113	98	55	3	4	2	3	1	1	2.70709	2.2939e-07			LINK	col-46 encodes a cuticle collagen.
WBGene00000960	dgk-3	F54G8.2	4	0	2	6	18	9	2	1	1	5	5	9	2.70135	0.0446981			LINK	dgk-3 encodes a diacylglycerol kinase that is the C. elegans ortholog of mammalian DGK-beta; dgk-3 activity is required for regulation of long-term thermotactic behavioral plasticity and for regulation of olfactory adaptation; large-scale expression studies have reported dgk-3 expression in head neurons, the intestine, and the pharyngeal lumen, while expression profiling indicates that dgk-3 is e…
WBGene00003879	ora-1	F57H12.3	51	24	21	193	205	128	43	44	42	39	19	26	2.69646	3.26727e-10	-1.01346	0.00520754	LINK	none available
WBGene00014039	ZK662.2	ZK662.2	26	41	37	188	267	115	7	11	7	6	3	4	2.69468	2.84368e-10			LINK	none available
WBGene00007461	C08F11.14	C08F11.14	3	6	11	41	36	34	3	4	3	7	6	6	2.69432	3.97064e-05			LINK	none available
WBGene00019318	K02E10.4	K02E10.4a	32	7	18	115	142	57	21	15	7	11	11	16	2.69173	3.27918e-05			LINK	none available
WBGene00004300	ram-2	F38A3.2	951	1149	836	6313	6398	3311	236	180	253	121	72	107	2.68979	7.89755e-22	-1.53897	5.87274e-19	LINK	ram-2 encodes a cuticle collagen that interacts with unc-6 to affect ray cell migration, and interacts with unc-5 and unc-6 to affect embryonic viability; also affects ray morphology in males such that the structural cells and the hypodermis of the rays are swollen in mutants.
WBGene00011895	T21C9.9	T21C9.9	18	45	55	216	279	155	10	9	13	24	24	24	2.68956	1.82207e-08			LINK	none available
WBGene00018965	F56D2.3	F56D2.3	36	10	13	109	135	77	5	9	11	3	11	7	2.68564	2.95906e-06			LINK	none available
WBGene00007734	C25G4.7	C25G4.7a	2	3	11	29	27	33	5	4	2	21	9	11	2.68528	0.00103719			LINK	none available
WBGene00018706	F52F10.2	F52F10.2	8	15	10	67	80	32	2	3	1	10	17	22	2.68227	6.72707e-06	2.66148	0.0033875	LINK	none available
WBGene00000742	col-169	T10E10.5	181	204	122	1060	1226	453	42	36	25	18	11	9	2.68213	1.1571e-11	-1.82812	6.67103e-05	LINK	none available
WBGene00007903	lgc-21	C33G3.3	54	64	46	342	330	217	17	23	24	28	18	24	2.67905	4.01665e-21			LINK	none available
WBGene00018502	F46F5.11	F46F5.11	1	17	5	45	35	43	7	8	8	15	8	9	2.67692	0.00167039			LINK	none available
WBGene00013960	cutl-8	ZK265.8a	14	5	0	32	44	25	4	3	9	29	26	16	2.67649	0.00832139	1.79457	0.00643882	LINK	none available
WBGene00017212	F07E5.7	F07E5.7	4	1	2	18	10	10	0	1	0	2	0	2	2.66663	0.0133628			LINK	none available
WBGene00000664	col-89	F17C8.2	17	27	28	167	145	78	8	20	15	27	15	30	2.66572	1.96034e-09			LINK	none available
WBGene00000256	bli-6	Y73B6BL.34	114	1053	861	4398	4190	2362	247	187	227	84	71	61	2.66347	0.00943163	-1.98592	8.40478e-28	LINK	bli-6 encodes a collagen involved in adult cuticle structure.
WBGene00000636	col-60	F22D6.10	32	379	366	1643	1622	939	81	68	96	122	93	98	2.66028	0.018743			LINK	none available
WBGene00015335	acdh-6	C02D5.1	25	21	23	121	166	82	5	10	6	35	20	30	2.65786	2.31991e-10	1.61651	0.00483229	LINK	none available
WBGene00008556	F07D3.3	F07D3.3	6	14	6	49	45	44	4	7	9	7	11	4	2.65486	1.42443e-06			LINK	none available
WBGene00010245	F58D5.6	F58D5.6	0	8	3	20	24	14	6	8	6	15	5	6	2.65331	0.0134329			LINK	none available
WBGene00019021	F57H12.6	F57H12.6	141	151	159	842	659	913	95	113	142	173	130	142	2.65283	3.58663e-39			LINK	none available
WBGene00022570	sdz-35	ZC239.12	10	8	11	51	38	66	4	5	10	55	67	66	2.65021	6.36585e-07	2.94962	5.04549e-10	LINK	none available
WBGene00022038	Y65B4BL.6	Y65B4BL.6a	22	10	6	72	63	66	14	7	2	8	1	10	2.6483	7.36514e-07			LINK	none available
WBGene00012346	W08G11.1	W08G11.1	15	3	8	61	34	44	12	15	6	18	17	16	2.64177	0.000103159			LINK	none available
WBGene00004397	rol-6	T01B7.7	463	94	86	1172	1492	703	33	19	30	41	27	20	2.64017	0.00671724			LINK	The rol-6 gene encodes a cuticle collagen related to human collagen alpha 1 (III) chain precursor (OMIM:120180), and is required for normal cuticular morphology; ROL-6 interacts with SQT-1, a closely related cuticle collagen, and is expressed at all stages from L2 to adult with transcripts detected at each of the molts preceding these stages.
WBGene00008013	C38D9.5	C38D9.5	0	8	2	22	22	8	2	5	2	3	4	3	2.63753	0.0336308			LINK	none available
WBGene00008727	F13A7.12	F13A7.12	6	9	8	39	40	42	13	5	3	15	14	16	2.63424	1.29263e-06			LINK	none available
WBGene00004232	ptr-18	Y38F1A.3	112	43	66	440	457	268	10	26	25	25	19	32	2.6301	1.99568e-10			LINK	ptr-18 encodes a nematode-specific member of the sterol sensing domain (SSD) proteins, distantly paralogous to Drosophila PATCHED (PTC) and human PTCH (OMIM:601309, mutated in basal cell nevus syndrome); PTR-18 is strongly required for normal molting from L3 to adult stage (a role conserved in C. briggsae); PTR-18 is also required for male tail development and vulval morphogenesis, and (partly) f…
WBGene00269333			2	3	5	21	14	18	1	0	5	2	5	1	2.63003	0.00241129			LINK
WBGene00010738	K10D3.4	K10D3.4	132	64	57	476	571	273	38	28	32	40	29	25	2.62769	9.0298e-10			LINK	none available
WBGene00021326	Y34B4A.10	Y34B4A.10	33	40	32	199	220	129	27	19	26	12	13	13	2.62406	4.74699e-15	-1.28765	0.00952388	LINK	none available
WBGene00014996	ZK1251.5	ZK1251.5	3	8	6	23	37	28	7	2	3	0	10	12	2.61796	0.000202471			LINK	none available
WBGene00016164	C27D9.2	C27D9.2	7	7	4	26	32	35	4	2	5	3	6	19	2.61703	4.3554e-05			LINK	none available
WBGene00018039	F35D2.1	F35D2.1	10	5	2	24	31	32	4	6	6	6	4	5	2.60886	0.000439443			LINK	none available
WBGene00017073	D2096.6	D2096.6	21	55	38	228	241	119	7	9	12	9	1	13	2.60741	1.59734e-08			LINK	none available
WBGene00044569	C25F6.8	C25F6.8	4	4	4	26	23	13	3	2	2	1	0	1	2.60251	0.00123078			LINK	none available
WBGene00018172	F38B6.2	F38B6.2	2	1	3	8	15	8	0	0	1	0	2	1	2.60202	0.0267643			LINK	none available
WBGene00017819	F26D11.2	F26D11.2	0	4	5	25	13	9	2	1	1	3	7	11	2.59613	0.0256858			LINK	none available
WBGene00008732	F13B12.4	F13B12.4	28	12	4	65	97	60	16	19	13	38	23	35	2.59602	0.000145564			LINK	none available
WBGene00015615	fbxc-48	C08G5.2	4	3	3	15	27	9	2	0	3	4	1	4	2.5952	0.00682601			LINK	none available
WBGene00019285	cbn-1	K01A2.11a	45	11	6	120	133	60	13	12	17	55	51	74	2.58787	0.000794387	1.72567	8.38897e-06	LINK	cbn-1 encodes a protein that contains a predicted signal peptide and calcium-binding EF-hand motifs.
WBGene00017814	F26A10.2	F26A10.2	26	38	31	178	195	110	21	22	21	14	9	14	2.58501	1.48731e-12	-1.17843	0.0234538	LINK	F26A10.2 encodes a protein with four zinc-finger domains and a glutamine/asparagine-rich domain, that is required for maintenance of the germline and for locomotion; F26A10.2(RNAi) animals are uncoordinated and have sterile progeny.
WBGene00000594	col-3	T28C6.6	1889	1856	1333	10112	10624	4970	491	466	456	332	197	288	2.58318	6.17336e-17	-1.18097	1.09258e-22	LINK	col-3 encodes a collagen protein that affects body morphogenesis, larval viability, and locomotion in large scale RNAi screens; mRNA is expressed during all developmental stages examined (in embryos, during the L2 to dauer molt, during the dauer to L4 larval molt, and during the L4 to adult molt).
WBGene00000687	col-113	C34D4.15	58	70	77	362	411	269	40	39	29	72	47	68	2.57948	2.13715e-20			LINK	none available
WBGene00194733	Y41C4A.21	Y41C4A.21	0	5	2	10	17	8	2	2	1	0	0	0	2.57916	0.0415268			LINK	none available
WBGene00269336			1	6	2	12	11	22	2	1	3	0	3	1	2.57746	0.0143409			LINK
WBGene00004098	pqn-2	AC3.4	10	65	27	206	212	92	0	3	6	2	1	1	2.57613	0.000133306			LINK	The protein product of this gene is predicted to contain a glutamine/asparagine (Q/N)-rich ('prion') domain, by the algorithm of Michelitsch and Weissman (as of the WS77 release of WormBase, i.e., in wormpep77).
WBGene00020707	wago-10	T22H9.3	9	38	45	174	174	122	29	17	23	1	3	1	2.5758	6.61725e-06	-4.14356	6.29281e-07	LINK	none available
WBGene00019150	H04J21.1	H04J21.1	1	5	6	22	21	18	2	3	9	1	4	5	2.57482	0.00237374			LINK	none available
WBGene00013495	clec-236	Y70C5C.5	0	9	17	52	48	34	5	2	5	9	4	13	2.56994	0.00954192			LINK	none available
WBGene00003545	nas-27	T23F4.4	22	59	63	271	292	165	35	41	42	8	9	17	2.566	3.88036e-08	-2.17428	7.52694e-07	LINK	nas-27 encodes an astacin-like metalloprotease; large-scale expression studies reveal that a nas-27::GFP promoter fusion is expressed in the reproductive system, the vulva, and the hypodermis.
WBGene00010060	F54E4.4	F54E4.4	2	3	2	13	13	9	3	4	5	12	13	19	2.56236	0.0130823			LINK	none available
WBGene00195004	K08D12.8	K08D12.8	1	3	3	12	17	6	5	4	4	5	0	2	2.55895	0.0248556			LINK	none available
WBGene00018580	F47G6.3	F47G6.3	7	17	11	56	69	49	15	17	19	6	2	2	2.55844	5.57666e-07	-2.74308	0.000188934	LINK	none available
WBGene00014703	C47A4.4	C47A4.4	2	9	1	27	17	15	0	1	2	1	1	11	2.55561	0.0101592			LINK	none available
WBGene00009024	F21G4.3	F21G4.3	11	2	0	25	20	19	3	0	0	0	7	0	2.55281	0.0278468			LINK	none available
WBGene00019520	K08B12.1	K08B12.1	88	13	16	211	238	128	20	24	32	34	15	26	2.54873	0.000660032			LINK	none available
WBGene00013032	wht-9	Y49E10.9	1	2	4	13	12	10	1	2	3	9	7	12	2.54487	0.0176828			LINK	none available
WBGene00018547	clec-78	F47C12.2	11	8	8	51	54	28	17	16	21	2	4	5	2.53735	1.34694e-05	-2.65959	0.000144144	LINK	none available
WBGene00000741	col-168	T10E10.1	514	699	466	3107	3547	1563	68	79	97	48	18	26	2.53663	1.29062e-14	-1.80334	5.35407e-09	LINK	none available
WBGene00000634	col-58	F26B1.4	74	38	46	262	285	230	24	14	18	66	46	56	2.53539	1.18836e-15	1.20476	0.00123057	LINK	none available
WBGene00001414	fer-1	F43G9.6a	12	23	47	157	152	102	27	17	27	1	1	4	2.53463	5.00259e-06	-3.93819	5.10619e-07	LINK	fer-1 encodes a member of the Ferlin family of proteins that are present across eukaryotic species; Ferlins contain multiple tandem cytosolic C2 domains, a DysF domain and a Fer domain, and are involved in vesicle fusion and membrane trafficking; fer-1 is a regulator of membranous organelle fusion and is required during spermatogenesis for calcium-mediated fusion of membranous vesicles with the s…
WBGene00000717	col-144	B0222.6	1807	1432	1132	8590	8748	4067	572	448	491	287	195	215	2.53313	1.06927e-14	-1.49787	6.71767e-35	LINK	none available
WBGene00016468	C36B7.5	C36B7.5a	6	13	6	47	37	38	6	8	10	4	4	7	2.53054	9.38588e-06			LINK	none available
WBGene00009835	F47H4.2	F47H4.2a	16	29	29	135	108	121	12	17	13	142	135	156	2.53044	9.11283e-13	2.99041	2.61842e-22	LINK	This gene encodes a protein containing an F-box, a motif predicted to mediate protein-protein interactions either with homologs of yeast Skp-1p or with other proteins; this gene's encoded protein also contains an FTH/DUF38 motif, which may also mediate protein-protein interaction.
WBGene00015990	C18H2.3	C18H2.3	3	8	3	22	20	26	5	6	5	6	8	16	2.52969	0.00098788			LINK	none available
WBGene00016662	C45B2.8	C45B2.8	8	4	6	24	25	39	3	8	8	8	5	7	2.52702	0.000246538			LINK	none available
WBGene00009229	F28G4.4	F28G4.4	5	4	2	31	15	8	2	3	1	5	6	8	2.52693	0.0107244			LINK	none available
WBGene00020033	R12E2.7	R12E2.7	121	182	139	764	832	557	51	35	41	61	54	55	2.52563	4.29622e-24			LINK	none available
WBGene00007174	mboa-1	B0395.2	35	8	17	101	116	76	8	6	10	33	26	49	2.52183	1.17935e-05	1.79003	0.000559867	LINK	mboa-1 encodes a putative acyl-Coenzyme A:cholesterol ('sterol') O-acyltransferase, orthologous to human SOAT1 (OMIM:102642); MBOA-1 is required for normal locomotion and normally long lifespan in mass RNAi assays; mboa-1 is expressed in the seam cells and nervous systems of larvae and adults, and in the adult reproductive system.
WBGene00019169	H06I04.5	H06I04.5	8	16	15	66	68	56	29	12	14	6	2	4	2.52063	4.40879e-08	-2.58645	0.000299809	LINK	none available
WBGene00014170	ZK945.8	ZK945.8	2	2	8	30	13	17	8	1	2	0	1	3	2.5193	0.0093235			LINK	none available
WBGene00194884	Y48B6A.17	Y48B6A.17	0	2	6	17	7	16	12	4	16	20	15	15	2.51844	0.0483631			LINK	none available
WBGene00020991	W03D8.10	W03D8.10	3	37	9	84	77	72	17	12	12	7	7	7	2.51695	0.00171652	-1.33747	0.0476695	LINK	none available
WBGene00014183	ZK1025.3	ZK1025.3	85	32	26	262	311	115	4	6	1	11	8	12	2.51299	1.67618e-05			LINK	none available
WBGene00044642	clec-69	F56D6.15	2	2	1	7	9	8	1	3	2	7	7	6	2.51119	0.0436432			LINK	none available
WBGene00011107	R07E3.6	R07E3.6	79	73	49	346	437	180	31	24	28	4	13	4	2.50794	2.75026e-10	-2.31806	4.12872e-05	LINK	none available
WBGene00000740	col-167	T10E10.2	1864	2213	1495	10269	10998	5391	525	403	491	210	157	196	2.50322	2.0446e-17	-1.71144	2.44504e-46	LINK	none available
WBGene00016329	osr-1	C32E12.3	33	14	12	91	111	79	16	13	13	37	29	31	2.49765	4.18122e-07			LINK	none available
WBGene00003768	nlp-30	B0213.5	49	27	19	170	154	128	85	58	97	45	35	47	2.49368	2.74535e-10	-1.29031	2.38421e-06	LINK	nlp-30 encodes five predicted neuropeptide-like proteins; in C. elegans, nlp-30 is part of the YGGWamide neuropeptide family that also contains nlp-24, nlp-25, and nlp-27-32; nlp-30 is expressed in the hypodermis, suggesting that the peptides it encodes may have a non-neuronal function; as loss of nlp-30 activity via large-scale RNAi screens does not result in any obvious abnormalities, the preci…
WBGene00016422	noah-1	C34G6.6a	383	249	250	1535	1891	780	194	166	162	77	63	107	2.49323	1.3657e-11	-1.46248	1.04553e-13	LINK	noah-1 encodes a PAN and ZP domain-containing protein that is related to the Drosophila extracellular matrix component NompA (no-mechanoreceptor-potential A); loss of noah-1 function via RNAi indicates that NOAH-1 activity is essential for molting; in addition, NOAH-1 appears to be required for embryonic and larval development, vulval development, coordinated locomotion, and normal body morpholog…
WBGene00022627	ZC513.2	ZC513.2	15	8	8	42	54	51	14	8	12	16	24	31	2.48893	2.2128e-06			LINK	none available
WBGene00013852	hhat-1	ZC101.3	87	29	16	195	282	142	27	27	23	59	40	73	2.48722	9.18659e-05			LINK	hhat-1 encodes a putative protein-cysteine N-palmitoyltransferase ('hedgehog acyltransferase') orthologous to human HHAT (OMIM: 605743) and GUP1 (OMIM:608116), and paralogous to HHAT-2; since C. elegans has no HEDGEHOG homolog, the substrate and function of HHAT-1 in vivo are unclear.
WBGene00015360	C02G6.2	C02G6.2	2	10	7	32	25	33	5	4	7	8	10	16	2.4821	0.000519402			LINK	none available
WBGene00019257	dhhc-13	H32C10.3	1	20	14	50	62	53	8	19	14	3	9	7	2.4802	0.00216466	-1.4675	0.0458452	LINK	none available
WBGene00004115	pqn-26	DY3.5	13	26	13	85	100	59	12	14	16	8	12	5	2.47941	1.64205e-07			LINK	The protein product of this gene is predicted to contain a glutamine/asparagine (Q/N)-rich ('prion') domain, by the algorithm of Michelitsch and Weissman (as of the WS77 release of WormBase, i.e., in wormpep77).
WBGene00020117	R155.3	R155.3	0	23	12	64	52	48	12	14	10	3	6	7	2.47338	0.0122251	-1.53976	0.0409095	LINK	none available
WBGene00020040	R12E2.15	R12E2.15	128	71	63	372	478	376	83	54	44	128	93	106	2.47269	3.22076e-14			LINK	none available
WBGene00000599	col-10	B0222.8	2467	1454	990	8782	9853	4159	480	426	535	394	313	363	2.46276	4.4179e-09			LINK	col-10 encodes a collagen protein; expressed exclusively in hypodermal cells
WBGene00007210	agmo-1	BE10.2	63	34	60	287	274	179	26	26	40	70	45	57	2.46125	1.27258e-11			LINK	none available
WBGene00020846	T27A10.6	T27A10.6	90	137	96	561	594	346	49	49	37	24	31	35	2.45884	1.32602e-16			LINK	none available
WBGene00020551	T17H7.7	T17H7.7	25	84	53	285	317	149	27	26	19	10	6	6	2.45685	1.22609e-06	-2.10054	0.000149595	LINK	none available
WBGene00012863	Y45F3A.8	Y45F3A.8	3	4	4	16	22	13	0	2	0	7	0	1	2.45272	0.00396528			LINK	none available
WBGene00010835	M03B6.3	M03B6.3	67	12	22	185	191	93	34	24	31	16	13	11	2.45121	0.000266481	-1.52586	0.000836566	LINK	none available
WBGene00044270	F35E2.10	F35E2.10	3	10	5	28	24	31	5	5	4	6	3	7	2.45048	0.000478781			LINK	none available
WBGene00018300	F41G3.3	F41G3.3	10	8	11	38	72	24	5	4	3	12	2	5	2.44726	0.000330833			LINK	none available
WBGene00018468	F45E4.3	F45E4.3a	14	9	9	41	67	39	14	7	4	6	15	17	2.44467	1.24735e-05			LINK	F45E4.3 encodes a protein containing C-terminal PDZ and C2 Ca2+-binding domains that is related to the mammalian active zone protein Piccolo/Aczonin; loss of F45E4.3 activity has been reported to result in uncoordinated locomotion, suggesting that F45E4.3 plays a role in the organization and/or function of the neuromuscular system.
WBGene00012456	Y17D7C.2	Y17D7C.2	6	2	2	17	17	12	1	2	0	11	6	5	2.44166	0.00923509			LINK	none available
WBGene00011175	R09E10.5	R09E10.5	8	3	9	36	47	10	34	25	43	175	126	177	2.43832	0.00692481	1.8498	2.13069e-14	LINK	none available
WBGene00019236	H23N18.5	H23N18.5	131	53	50	370	370	330	34	41	46	25	30	35	2.4364	1.75674e-09			LINK	none available
WBGene00000691	col-117	T28C6.4	1660	1974	1360	8144	9988	4612	482	434	479	410	329	407	2.43416	1.12311e-15			LINK	none available
WBGene00016259	C30F8.3	C30F8.3	5	6	7	26	32	24	5	7	2	7	11	9	2.42444	0.000219616			LINK	none available
WBGene00014100	ZK849.1	ZK849.1	8	10	23	63	70	56	12	9	6	4	8	5	2.42265	1.51891e-05			LINK	none available
WBGene00010714	mam-3	K09B11.10	43	23	16	112	148	108	24	22	14	36	35	29	2.41591	4.56594e-08			LINK	none available
WBGene00017154	ugt-57	F01E11.1	28	7	5	59	87	33	10	12	11	27	11	20	2.41514	0.00267754			LINK	none available
WBGene00000747	col-174	F46C8.2	36	25	24	127	142	114	14	13	9	43	34	38	2.41215	1.48195e-13	1.29264	0.00465644	LINK	none available
WBGene00012401	irld-57	Y6E2A.8	3	6	6	27	19	22	4	4	5	3	5	8	2.41168	0.000952462			LINK	none available
WBGene00021213	Y18H1A.9	Y18H1A.9	30	37	26	153	167	97	13	7	3	22	19	22	2.40722	2.89917e-11			LINK	none available
WBGene00018026	F35A5.4	F35A5.4	9	18	18	74	79	49	6	2	3	7	10	7	2.40009	1.14205e-06			LINK	none available
WBGene00012939	Y47D3B.1	Y47D3B.1	36	15	7	68	139	48	25	22	19	35	28	24	2.39992	0.00106009			LINK	none available
WBGene00016805	C50D2.1	C50D2.1	42	19	22	124	151	95	24	16	11	11	21	17	2.39652	4.05039e-08			LINK	none available
WBGene00008743	F13D12.9	F13D12.9	68	186	143	620	687	462	84	99	112	37	24	20	2.39538	5.59773e-10	-2.24599	1.96106e-15	LINK	none available
WBGene00007356	C06A1.6	C06A1.6	3	1	4	12	14	10	0	0	0	1	2	4	2.39495	0.0213259			LINK	none available
WBGene00022889	ZK1290.7	ZK1290.7	3	2	4	7	18	15	6	6	3	6	1	2	2.39198	0.0202948			LINK	none available
WBGene00017035	D1065.3	D1065.3	2	11	8	29	42	22	8	10	11	4	12	6	2.39045	0.00198524			LINK	none available
WBGene00013180	cutl-10	Y53H1B.1	16	16	5	38	81	42	15	14	4	28	23	17	2.38796	0.000249649			LINK	none available
WBGene00007250	nspb-8	C01G12.10	2	14	17	55	50	43	1	6	2	9	5	12	2.38774	0.000898134			LINK	none available
WBGene00009061	F22G12.1	F22G12.1	4	8	7	20	17	47	3	5	4	32	15	10	2.38543	0.00292553	1.84782	0.0157413	LINK	none available
WBGene00000190	arf-1.1	F45E4.1	81	235	204	724	509	1077	114	98	121	466	500	696	2.38542	2.2653e-07	1.94985	2.34501e-34	LINK	arf-1.1 encodes a member of the ADP-ribosylation factor family.
WBGene00011524	T06D8.3	T06D8.3	14	21	23	93	113	51	4	10	2	5	7	7	2.38091	1.95941e-06			LINK	none available
WBGene00003532	nas-13	F39D8.4	7	3	6	31	27	13	3	1	2	8	5	8	2.3749	0.00299177			LINK	nas-13 encodes an astacin-like metalloprotease.
WBGene00018616	F48G7.5	F48G7.5	23	58	32	141	248	101	10	14	19	26	19	19	2.37266	5.21511e-06			LINK	none available
WBGene00011313	T01B7.8	T01B7.8	9	5	3	25	35	14	1	0	1	5	3	5	2.37095	0.00350582			LINK	none available
WBGene00017421	cutl-29	F13B9.6	9	4	3	31	29	10	3	3	4	6	4	7	2.36869	0.00773828			LINK	none available
WBGene00011796	T16G1.2	T16G1.2a	18	15	15	74	91	45	4	4	5	19	4	8	2.36806	1.04894e-06			LINK	none available
WBGene00000729	col-156	F57B7.3	66	117	118	527	492	301	47	24	40	44	30	47	2.36168	1.16454e-11			LINK	none available
WBGene00015457	C04G6.7	C04G6.7	15	7	3	27	51	29	1	2	0	8	3	6	2.35744	0.00189302			LINK	none available
WBGene00012785	Y43C5B.2	Y43C5B.2	2	3	4	7	14	18	11	5	0	12	1	17	2.35634	0.022551			LINK	none available
WBGene00008994	F21A3.4	F21A3.4	10	15	13	45	65	54	17	11	6	12	5	14	2.35297	1.10516e-06			LINK	none available
WBGene00014854	W05B2.3	W05B2.3	3	6	1	5	18	19	2	2	1	0	0	0	2.34779	0.0414316			LINK	none available
WBGene00022611	ZC449.1	ZC449.1	38	7	13	89	98	63	12	2	4	35	28	29	2.34564	0.00043344	1.98358	0.000997299	LINK	none available
WBGene00009355	F33A8.7	F33A8.7	58	24	28	217	139	120	15	11	26	14	14	3	2.3433	2.8333e-07			LINK	none available
WBGene00011260	R13G10.4	R13G10.4	3	9	15	33	47	37	14	10	12	14	4	11	2.34086	0.000835244			LINK	R13G10.4 encodes a predicted transmembrane protein orthologous to human ACDP1-ACDP4 and S. cerevisiae MAM3, and paralogous to C01H6.6, C33D12.2, C52D10.12, M02F4.3, and R04E5.2; by orthology with MAM3, R13G10.4 may participate in metal homoeostasis; R13G10.4, MAM3, and ACDP1-ACDP4 belong to a family of proteins (sharing an ACD domain) from bacteria, yeast, plants, and metazoa; murine Acdp1 is a p…
WBGene00001593	glc-3	ZC317.3	5	3	1	9	16	13	3	2	2	25	13	17	2.33549	0.0244233	2.58025	0.0019343	LINK	glc-3 encodes an L-glutamate-gated chloride channel subunit; GLC-3 is sensitive to fipronil and BIDN, but picrotoxinin-insensitive; GLC-3 is expressed in the AIY interneuron.
WBGene00019556	K09C6.2	K09C6.2	3	11	13	40	47	29	4	5	7	16	19	20	2.33263	0.000638441	1.41896	0.0394373	LINK	none available
WBGene00006651	tts-2	R05H5.8	126	69	48	375	437	217	90	52	70	60	57	57	2.33049	1.25606e-07			LINK	none available
WBGene00020421	T10E10.4	T10E10.4	12	11	16	59	68	40	0	4	4	3	4	3	2.32938	4.12694e-06			LINK	T10E10.4 encodes a large (966-residue) protein, predicted to be secreted, with two N-terminal chitin-binding peritrophin-A domains followed by 14 cysteine-rich domains and one C-terminal EB module; the general organization of T10E10.4 protein resembles that of K04H4.2; T10E10.4 has no obvious function in mass RNAi assays but, like CEJ-1 and CPG-2, might participate in chitin synthesis.
WBGene00044620	bus-4	T22B11.2	28	28	12	132	106	50	11	8	26	17	15	18	2.32839	2.01372e-05			LINK	bus-4 encodes a galactosyltransferase; bus-4 is required for bacterial infection, and for fully normal cuticle integrity and body size; specifically, bus-4 is needed both for colonization by Microbacterium nematophilum (and the tail-swelling response to M. nematophilum infection) and for attachment of Yersinia pseudotuberculosis biofilms.
WBGene00009465	F36D1.6	F36D1.6	0	4	6	14	20	9	4	0	1	2	1	4	2.32764	0.0481481			LINK	none available
WBGene00000685	col-111	F29B9.9	134	72	53	377	384	333	55	38	42	169	116	123	2.32523	5.85722e-11	1.21411	5.43704e-07	LINK	none available
WBGene00019601	K09H11.4	K09H11.4	3	6	6	28	30	6	10	13	13	3	10	7	2.32337	0.0176828			LINK	none available
WBGene00011077	R07B1.5	R07B1.5	3	6	2	14	22	10	1	2	2	5	8	3	2.32067	0.0150681			LINK	none available
WBGene00018929	F56B3.3	F56B3.3	5	2	2	13	13	12	5	5	7	22	16	15	2.3184	0.0175505			LINK	none available
WBGene00009653	F43D9.1	F43D9.1	29	22	27	107	142	80	34	29	44	9	5	6	2.31344	8.16316e-09	-2.7972	2.47334e-08	LINK	none available
WBGene00003075	lrx-1	T04H1.6	15	10	12	54	66	36	18	23	11	28	12	24	2.31294	1.12954e-05			LINK	lrx-1 encodes a protein that contains four class A low-density lipoprotein receptor domains.
WBGene00001711	grl-2	T16G1.8	1	7	3	18	19	9	1	1	2	3	4	1	2.31218	0.0241262			LINK	grl-2 encodes a hedgehog-like protein, with an N-terminal signal sequence, a central proline-rich low-complexity region, and a C-terminal Ground-like (Grl) domain; GRL-2 is expressed in neurons, amphid socket cells, and other cells; the Grl domain is predicted to form a cysteine-crosslinked protein involved in intercellular signalling, and it has subtle similarity to the N-terminal Hedge domain o…
WBGene00008150	mam-2	C47E12.6a	63	13	48	201	200	128	21	24	29	80	55	72	2.31122	7.11854e-05	1.10071	0.000751565	LINK	none available
WBGene00020766	T24C12.4	T24C12.4	8	12	10	43	45	38	4	5	4	8	5	8	2.30956	6.55802e-06			LINK	none available
WBGene00021995	Y59E9AL.5	Y59E9AL.5	5	11	4	24	31	28	11	3	3	14	14	6	2.30763	0.000744743			LINK	none available
WBGene00003520	nas-1	F45G2.1	1	13	6	29	29	25	0	4	1	2	1	4	2.30269	0.00694556			LINK	nas-1 encodes an astacin-like metalloprotease.
WBGene00009148	F26D2.3	F26D2.3a	2	1	5	12	10	12	4	4	2	39	22	27	2.30168	0.0345946	2.74177	4.41658e-05	LINK	none available
WBGene00009094	F23H12.5	F23H12.5	62	30	34	187	200	139	13	30	41	119	114	122	2.29979	1.35178e-09	1.71025	1.72744e-08	LINK	none available
WBGene00013486	egas-1	Y69H2.11	2	3	2	8	10	11	1	2	5	4	6	6	2.29612	0.0353056			LINK	none available
WBGene00000689	col-115	Y42H9B.1	75	37	28	213	222	144	15	19	25	42	26	38	2.29332	1.34227e-07			LINK	none available
WBGene00020864	oac-50	T27E4.6	4	12	13	34	44	42	13	12	7	9	16	16	2.28466	0.000224094			LINK	none available
WBGene00018024	F35A5.1	F35A5.1	73	121	96	430	436	330	69	54	64	22	26	27	2.28321	2.24548e-18	-1.68545	1.09265e-07	LINK	The F35A5.1 gene encodes a homolog of human FMR2, which when mutated leads to fragile site mental retardation, type 2 (OMIM:309548).
WBGene00016516	C38C3.8	C38C3.8	2	12	6	17	44	20	2	6	8	1	1	1	2.2794	0.0117332	-2.78786	0.0446781	LINK	none available
WBGene00009331	F32D8.7	F32D8.7a	34	36	34	153	181	94	19	12	28	22	24	25	2.27918	1.22642e-09			LINK	none available
WBGene00018741	comt-1	F53B3.2	4	1	3	10	14	9	1	0	4	1	0	3	2.27793	0.034909			LINK	none available
WBGene00006789	unc-54	F11C3.3	3595	8139	6373	26451	27615	20275	2614	2464	2683	1971	1548	1796	2.27649	5.29042e-13			LINK	unc-54 encodes a muscle myosin class II heavy chain (MHC B); UNC-54 is the major myosin heavy chain expressed in C. elegans and is required for locomotion and egg-laying; in vivo and in vitro, UNC-54 interacts with ITR-1, an IP3 receptor, and this interaction may provide a link between calcium signaling and the muscle cytoskeleton; UNC-54 is a thick filament component that is expressed in multipl…
WBGene00077697	F58E6.13	F58E6.13a	117	93	93	476	369	397	66	69	78	85	46	63	2.26934	6.0394e-28			LINK	none available
WBGene00008658	clec-152	F10F2.6	4	11	13	39	31	45	7	4	6	14	9	11	2.26683	0.000308982			LINK	none available
WBGene00017785	F25E5.4	F25E5.4	12	14	15	66	42	60	15	11	21	70	77	91	2.26538	1.15869e-06	1.97784	2.28329e-08	LINK	none available
WBGene00012255	lpr-6	W04G3.1a	196	53	40	427	485	255	32	31	42	86	75	92	2.2641	0.000281939			LINK	lpr-6 encodes one of seven C. elegans proteins related to the lipocalin family of structurally related, low molecular weight, secreted proteins that bind and transport lipophilic molecules and participate in intercellular signaling; lpr-6 has been reported to be expressed in the amphid sensory neurons.
WBGene00001736	grl-27	F40C5.3	18	45	31	146	131	105	9	7	5	11	4	3	2.26225	1.93996e-08			LINK	grl-27 encodes a hedgehog-like protein, with an N-terminal signal sequence, a central low-complexity region, and a C-terminal Ground-like (Grl) domain; GRL-27 is expressed in arcade cells; the Grl domain is predicted to form a cysteine-crosslinked protein involved in intercellular signalling, and it has subtle similarity to the N-terminal Hedge domain of HEDGEHOG proteins.
WBGene00012648	Y39A1A.9	Y39A1A.9	45	25	20	142	167	55	6	11	12	0	0	1	2.25968	7.6111e-05	-5.12879	0.000521012	LINK	none available
WBGene00011590	bus-19	T07F10.4a	73	55	50	255	286	180	26	13	21	32	26	40	2.25848	1.26541e-13			LINK	bus-19 encodes an ancient but unfamiliar transmembrane protein required for colonization by Microbacterium nematophilum and the tail-swelling response to M. nematophilum infection, as well as for cuticle integrity and traction during movement, normal alae and body shape, dauer formation, normally rapid growth, and larval viability; BUS-19 (along with Y71A12C.2) is orthologous to human TMEM41A, an…
WBGene00022630	fbxa-223	ZC513.10	3	13	3	31	18	27	2	4	1	5	3	2	2.25455	0.00721087			LINK	fbxa-223 encodes a protein containing an F-box, a motif predicted to mediate protein-protein interactions either with homologs of yeast Skp-1p or with other proteins; FBXA-223 also contains an FTH/DUF38 motif, which may also mediate protein-protein interaction.
WBGene00017869	F28A10.1	F28A10.1	9	15	16	52	57	53	7	28	7	15	9	10	2.25366	1.52557e-06			LINK	F28A10.1 encodes a putative small-molecule methyltransferase, belonging to a large nematode-specific expanded family; F28A10.1 inhibits CEP-1- and HUS-1-dependent germline apoptosis, as do BMK-1, RAD-50, and RAD-51; F28A10.1 is expressed in neurons, and F28A10.1 transcripts are enriched in spermatogenesis; although F's obvious homologs are all Caenorhabditis proteins, it has distant similarity to…
WBGene00015991	C18H2.4	C18H2.4	7	11	8	38	34	33	11	9	14	11	14	18	2.25309	4.802e-05			LINK	C18H2.4 is orthologous to the human gene GLOMULIN (FAP48; OMIM:601749), which when mutated leads to disease.
WBGene00000447	ceh-24	F55B12.1	10	1	2	12	26	14	0	1	3	4	7	14	2.25222	0.0444366			LINK	ceh-24 encodes an NK class homeodomain protein orthologous to human NK2 Homeobox 1 (NKX2-1; OMIM:600635) which is expressed in the thyroid, lung, and bronchial epithelia and which, when mutated, leads to disease.
WBGene00018127	F36H12.14	F36H12.14	9	10	17	47	52	47	12	16	6	4	3	4	2.24835	1.16315e-05	-2.02737	0.0146359	LINK	none available
WBGene00008655	lips-3	F10F2.3	92	35	37	254	239	166	20	22	22	79	53	87	2.24559	8.31905e-07	1.38608	3.24828e-05	LINK	none available
WBGene00007262	jud-4	C02D4.1	14	9	2	29	36	34	1	5	8	9	10	13	2.24526	0.00201646			LINK	jud-4 encodes an unfamiliar protein, putatively secreted, that is required both for normal sensitivity to ethanol and for survival after freezing and thawing; JUD-4 is expressed in hypodermis and vulval muscles; JUD-4 is orthologous to Brugia malayi Bm1_40315, but lacks obvious orthologies to non-nematode proteins; JUD-4's C-terminal domain has possible similarity to F40E10.5, and to proteins suc…
WBGene00017716	F22F4.1	F22F4.1	123	35	31	262	320	172	19	37	25	69	68	87	2.24496	0.000158048	1.08478	0.00126335	LINK	none available
WBGene00007806	clec-230	C29F3.5	26	6	4	45	68	30	4	6	6	14	10	17	2.24484	0.00809467			LINK	none available
WBGene00010004	F53H2.1	F53H2.1	2	6	4	18	15	15	6	5	3	22	28	35	2.23887	0.00899786	2.23234	0.000354477	LINK	none available
WBGene00020270	T05H4.7	T05H4.7	7	15	5	40	40	27	2	1	9	11	10	17	2.23854	0.000436443			LINK	none available
WBGene00016962	C56C10.4	C56C10.4	32	8	3	61	60	48	10	4	7	11	7	15	2.22897	0.00744937			LINK	none available
WBGene00003462	msp-74	F09C12.7	2	6	2	9	13	17	1	0	2	1	0	0	2.22206	0.0285588			LINK	msp-74 encodes a protein that belongs to a family of proteins called the Major Sperm Proteins (MSPs) that is conserved in nematodes; this family consists of closely related, small, basic proteins that make up 15% of sperm protein; this multigene family consists of over fifty genes, including many pseudogenes; MSPs are involved in both extracellular signaling and cytoskeletal functions during repr…
WBGene00016675	C45G9.4	C45G9.4	10	35	25	77	113	85	10	3	14	4	1	13	2.22037	2.38675e-05			LINK	none available
WBGene00018993	nhr-266	F56H1.2	1	6	3	10	14	15	4	5	5	6	8	10	2.2152	0.0304134			LINK	none available
WBGene00303081			26	2	3	42	57	22	3	3	2	1	2	3	2.21507	0.0411562			LINK
WBGene00001068	dpy-6	F16F9.2	58	66	58	262	329	124	23	21	30	12	9	6	2.21365	1.42724e-07	-1.82624	0.000541574	LINK	dpy-6 encodes a novel, conserved protein; dpy-6 activity is required for normal body morphology; DPY-6 binds bovine calmodulin in vitro in a calcium-dependent manner.
WBGene00009398	nspb-11	F35C5.10	2	4	8	27	13	16	4	2	0	1	3	3	2.20913	0.0146264			LINK	none available
WBGene00020283	T06A4.3	T06A4.3a	67	87	100	375	409	216	28	37	33	26	22	39	2.20665	2.12439e-10			LINK	none available
WBGene00012917	Y46G5A.29	Y46G5A.29	54	90	66	324	318	176	29	30	28	25	16	27	2.20093	4.22092e-10			LINK	none available
WBGene00012609	Y38F1A.7	Y38F1A.7	5	13	11	45	31	37	1	2	3	8	7	4	2.19486	0.000201744			LINK	none available
WBGene00003242	mig-6	C37C3.6a	820	1431	1263	5088	5142	3355	1003	991	1126	101	87	77	2.18551	1.11934e-14	-3.93351	1.53554e-243	LINK	mig-6 encodes at least two protein isoforms (long and short) that are highly similar to the extracellular matrix proteins papilin and lacunin; mig-6 is an essential gene required for embryonic hypodermal cell enclosure and normal excretory canal cell function in L1 larvae; MIG-6(S) activity is required cell nonautonomously for the ventral to dorsal phase of distal tip cell (DTC) migration and app…
WBGene00019020	F57H12.5	F57H12.5	10	50	20	102	115	86	36	27	34	8	8	13	2.17894	0.000257187	-2.1159	7.81787e-06	LINK	none available
WBGene00006970	zag-1	F28F9.1	17	14	12	64	67	34	15	22	19	13	5	4	2.17878	2.97996e-05	-1.74924	0.0052542	LINK	zag-1 encodes a homeodomain protein of the ZFH class which consists of a homeodomain flanked by two clusters of C2H2-type zinc fingers and is related to transcriptional repressors encoded by Drosophila zfh-1 and the vertebrate ZEB genes; ZAG-1 is required for locomotion, for neuronal differentiation, and for proper axonal branching and fasciculation; from late embryogenesis through adult stages o…
WBGene00011053	arrd-12	R06B9.2	2	2	4	13	9	9	1	2	0	7	9	14	2.17546	0.0410934	2.9368	0.0180423	LINK	none available
WBGene00008482	cut-4	E04D5.3	18	65	56	213	185	137	36	32	36	17	22	21	2.17545	1.53023e-05	-1.15818	0.00419432	LINK	none available
WBGene00019067	F58H7.1	F58H7.1	3	4	6	21	17	12	1	1	2	4	0	2	2.16816	0.010448			LINK	none available
WBGene00006759	unc-22	ZK617.1a	254	422	403	1282	1689	1141	174	237	194	135	123	155	2.16789	2.98318e-14			LINK	unc-22 encodes twitchin, a giant intracellular protein with multiple fibronectin- and immunoglobulin-like domains and a single protein kinase domain that is homologous to titin (OMIM:188840); UNC-22 is required in muscle for regulation of the actomyosin contraction-relaxation cycle and for maintenance of normal muscle morphology; UNC-22 associates with myosin and is localized to A-bands; in vitro…
WBGene00004233	ptr-19	Y39A1B.2a	7	13	9	55	28	28	5	4	2	1	3	0	2.16703	0.000535235			LINK	ptr-19 encodes an ortholog of Drosophila and human PTCHD3, which defines one of seven paralogous families of sterol sensing domain (SSD) proteins; PTR-19 is required for normal development in mass RNAi assays; PTR-19 is expressed in pharynx, hypodermis, nervous system (including head neurons), and other cells.
WBGene00019435	K06A9.1	K06A9.1a	23	88	42	178	279	117	92	71	98	6	13	9	2.16627	0.000174424	-3.5803	1.20497e-21	LINK	The K06A9.1 gene encodes an homolog of human TCOF1, which when mutated leads to Treacher-Collins syndrome (OMIM:154500).
WBGene00045494	ZK662.6	ZK662.6	25	9	5	44	31	72	0	3	8	13	9	6	2.16509	0.00404911			LINK	none available
WBGene00019759	M03F4.6	M03F4.6	39	49	43	188	171	139	19	14	9	16	11	11	2.16283	5.20852e-15			LINK	none available
WBGene00007415	C07E3.4	C07E3.4	4	21	20	55	75	40	20	18	17	5	1	7	2.15251	0.00195988	-2.48256	0.000290005	LINK	none available
WBGene00219436	C49H3.16	C49H3.16	8	10	15	45	52	28	12	15	10	23	12	21	2.14926	0.000285616			LINK	none available
WBGene00018215	igcm-1	F39H12.4	29	20	32	105	122	79	25	22	9	26	30	31	2.14767	7.34474e-08			LINK	igcm-1 encodes a protein containing immunoglobulin and fibronectin repeats; igcm-1 promoter::gfp fusions are expressed in the labial neurons, including the sheath and socket cells, as well as in the pharynx and lateral hypodermis.
WBGene00021630	Y47D9A.3	Y47D9A.3	3	16	6	34	32	27	1	6	6	2	5	5	2.14763	0.00381814			LINK	none available
WBGene00019592	K09F6.9	K09F6.9	4	2	4	18	9	11	13	15	14	35	32	45	2.14651	0.0288834	1.03574	0.0214659	LINK	none available
WBGene00235268			51	13	10	88	118	69	22	14	9	23	23	25	2.14638	0.00216109			LINK
WBGene00009311	mltn-1	F32A11.7	29	37	30	124	139	95	21	15	16	40	25	41	2.13938	1.32604e-10			LINK	none available
WBGene00001063	dpy-1	M01E10.2a	19	13	14	55	86	30	10	11	13	2	2	6	2.13598	0.000379172	-2.14717	0.0103885	LINK	dpy-1 encodes a collagen that affects body length and alae formation; site of action localized to the hyp7 syncytium, based on mosaic analysis.
WBGene00020014	R11G11.6	R11G11.6	44	5	4	82	47	67	2	2	8	2	9	5	2.13118	0.0284684			LINK	none available
WBGene00010871	M05B5.3	M05B5.3	14	41	18	103	90	76	29	19	24	36	28	27	2.13104	1.20271e-05			LINK	none available
WBGene00001113	dur-1	F25H8.5a	142	184	150	639	757	366	59	51	54	79	95	81	2.12891	2.89917e-11			LINK	The dur-1 ('Dauer UpRegulated') gene encodes proteins (DUR-1A and DUR-1C) that are predicted to be hydrophilic and heat-resistant, and that might participate in anhydrobiosis; expression of at least one dur-1 transcript is upregulated in dauer larvae and other transcripts may be specifically expressed in dauer larvae.
WBGene00219303	Y13C8A.4	Y13C8A.4	6	7	1	19	25	7	4	1	7	37	32	34	2.12816	0.0428524	2.73894	9.65754e-06	LINK	none available
WBGene00010594	swt-5	K06A4.4	8	6	7	29	30	19	4	5	7	10	11	12	2.12803	0.00120348			LINK	none available
WBGene00003889	osm-9	B0212.5	2	7	4	20	19	9	5	7	5	6	4	12	2.12551	0.0230882			LINK	osm-9 encodes a TRPV channel homologous to capsaicin receptors; osm-9 is involved in sensory responses to a subset of chemical stimuli and to ASH neuron-mediated osmotic and mechanical stimuli; OSM-9 is also involved in adaptation to volatile odorants and salts; OSM-9 is expressed in a variety of sensory neurons and shows neuron-specific localization to either the cell body or the cilium.
WBGene00008487	F01D4.3	F01D4.3	4	14	4	23	34	23	2	4	7	3	7	12	2.12506	0.00622383			LINK	none available
WBGene00021454	Y39F10A.3	Y39F10A.3	9	21	16	56	46	68	11	3	13	12	7	5	2.1249	2.30442e-05			LINK	none available
WBGene00009489	F36G9.13	F36G9.13	6	15	13	54	36	36	10	8	8	9	6	5	2.12021	0.000224219			LINK	none available
WBGene00015545	C06G1.1	C06G1.1a	70	75	86	290	337	226	35	20	33	56	41	52	2.11851	1.11934e-14			LINK	none available
WBGene00021109	W09C3.1	W09C3.1	2	5	14	28	22	29	13	6	18	2	23	10	2.11684	0.0143057			LINK	none available
WBGene00020381	T09B4.7	T09B4.7	5	9	13	34	32	34	5	6	8	15	13	16	2.11647	0.000517497			LINK	none available
WBGene00206509	Y102A5C.43	Y102A5C.43	3	4	2	15	12	6	4	1	1	4	2	2	2.11468	0.0460411			LINK	none available
WBGene00016153	C27A2.5	C27A2.5	14	15	1	25	50	32	11	4	2	7	15	1	2.11467	0.0172355			LINK	none available
WBGene00019859	R03H10.7	R03H10.7	8	14	11	43	44	34	6	7	6	36	32	46	2.11358	5.99124e-05	2.20466	2.66822e-05	LINK	none available
WBGene00013775	Y116A8A.4	Y116A8A.4	1	5	9	22	12	22	4	5	8	2	4	6	2.11204	0.0293234			LINK	none available
WBGene00019640	dos-2	K10G6.2	3	6	12	29	20	29	4	2	0	2	3	2	2.10846	0.00572514			LINK	none available
WBGene00000739	col-166	T07H6.3a	2128	1618	1116	6582	7619	3449	887	659	907	299	248	274	2.10766	3.09414e-09	-1.95087	3.1687e-79	LINK	none available
WBGene00009193	F27E5.3	F27E5.3	7	37	25	86	105	60	11	12	9	3	3	2	2.10647	0.000869975	-2.3782	0.00660899	LINK	none available
WBGene00015408	C03H5.6	C03H5.6	10	15	5	32	46	30	5	0	3	5	5	4	2.10581	0.00072798			LINK	none available
WBGene00012684	Y39B6A.25	Y39B6A.25	6	15	18	52	56	35	3	4	8	1	2	2	2.10278	0.000407641			LINK	none available
WBGene00018439	fbxa-184	F45C12.8	5	9	5	28	19	22	13	13	14	77	45	76	2.10045	0.00245152	1.91536	5.39591e-07	LINK	This gene encodes a protein containing an F-box, a motif predicted to mediate protein-protein interactions either with homologs of yeast Skp-1p or with other proteins; this gene's encoded protein also contains an FTH/DUF38 motif, which may also mediate protein-protein interaction.
WBGene00017803	F26A1.4	F26A1.4	3	16	12	33	49	30	5	7	3	8	10	9	2.09693	0.00371421			LINK	none available
WBGene00018514	F46G11.1	F46G11.1	2	15	8	33	32	25	4	3	2	12	6	15	2.09349	0.00725808			LINK	F46G11.1 is orthologous to the human gene TRUNCATED PUTATIVE T7-LIKE MITOCHONDRIAL DNA HELICASE (C10orf2; OMIM:606075), which when mutated leads to disease.
WBGene00008500	F01D5.10	F01D5.10	22	19	16	63	79	63	11	11	13	11	4	11	2.08971	2.22354e-07			LINK	none available
WBGene00019906	R05G9R.1	R05G9R.1	6	8	5	20	33	15	8	12	7	20	25	33	2.08903	0.00572275	1.15356	0.0434267	LINK	none available
WBGene00011608	T08D2.3	T08D2.3	14	21	21	48	92	61	18	26	19	75	51	69	2.08751	3.25007e-05	1.23877	0.000380229	LINK	none available
WBGene00006436	ttn-1	W06H8.8a	66	132	106	364	376	354	141	145	128	219	146	185	2.08705	5.32043e-13			LINK	ttn-1, through multiple splicing, encodes at least six protein isoforms that are orthologs of titin (OMIM:188840, mutated in cardiomyopathy or tibial muscular dystrophy), with the three largest isoforms being 2.2 MDa, 1.2 MDa and 301 kDa; TTN-1 isoforms are expressed in body wall and vulval muscle, localized to the centers of I-bands, with the two largest isoforms expressed in all muscles except …
WBGene00007687	C18E9.7	C18E9.7	26	39	23	99	160	54	38	30	31	20	9	12	2.08346	0.000106124	-1.66371	0.000190211	LINK	none available
WBGene00001546	gcy-21	F22E5.3	8	9	7	28	32	26	5	6	5	14	10	8	2.08322	0.000464026			LINK	gcy-21 is predicted to encode a guanylate cyclase.
WBGene00011522	srap-1	T06D8.1a	127	143	123	420	712	272	215	179	207	17	13	23	2.08316	1.32897e-07	-3.88177	3.26211e-51	LINK	none available
WBGene00008215	C49F8.3	C49F8.3	151	113	96	514	473	306	60	52	62	83	74	96	2.08314	1.16076e-12			LINK	none available
WBGene00012032	T26C5.2	T26C5.2	203	56	55	431	451	239	60	66	72	206	164	210	2.08028	0.000361935	1.17063	1.11914e-09	LINK	none available
WBGene00020478	T13C2.2	T13C2.2	21	6	8	38	49	38	9	10	9	20	23	20	2.07913	0.00141348			LINK	none available
WBGene00016146	C26F1.1	C26F1.1a	62	55	42	194	264	108	42	34	39	35	23	38	2.07779	9.03176e-07			LINK	none available
WBGene00010968	R01E6.2	R01E6.2	17	1	9	32	43	22	1	1	5	3	1	2	2.07258	0.0281954			LINK	none available
WBGene00008496	F01D5.6	F01D5.6	108	35	26	235	225	138	16	13	16	66	36	66	2.06954	0.000411814	1.50781	0.000136757	LINK	none available
WBGene00011888	cutl-15	T21B10.6	55	45	45	178	195	143	24	13	24	126	114	105	2.06949	2.24776e-13	2.13417	1.00534e-12	LINK	none available
WBGene00020292	nep-19	T06D4.3	2	3	8	16	10	21	1	4	2	5	1	0	2.06647	0.0353056			LINK	T06D4.3 encodes a neprilysin; neprilysins are thermolysin-like zinc metallopeptidases, found on the outer surface of animal cells, that negatively regulate small signalling peptides (e.g., enkephalin, tachykinin, insulin, and natriuretic peptides) by cleaving them; T06D4.3 has no clear orthologs in other organisms.
WBGene00009318	F32B4.8	F32B4.8	9	3	5	16	29	15	3	3	4	3	1	5	2.06149	0.0148583			LINK	none available
WBGene00002118	ins-35	K02E2.4	39	20	18	95	110	66	5	2	4	6	12	16	2.05819	1.20243e-05			LINK	ins-35 encodes one of several insulin-related peptides.
WBGene00015218	B0507.1	B0507.1	25	25	16	88	112	31	7	10	17	8	15	11	2.05423	0.000744523			LINK	none available
WBGene00013124	Y52B11A.4	Y52B11A.4	15	16	11	48	68	31	12	8	17	17	4	7	2.05418	0.000211098			LINK	none available
WBGene00044533	F41F3.8	F41F3.8	68	7	20	112	136	86	29	16	13	37	30	29	2.05277	0.00923509			LINK	none available
WBGene00009500	F36H2.3	F36H2.3a	29	39	44	134	146	115	40	39	38	14	6	14	2.0519	2.39662e-10	-2.17676	5.44981e-07	LINK	none available
WBGene00000485	che-3	F18C12.1	7	14	6	32	40	22	21	13	12	49	44	67	2.05143	0.00181542	1.41957	0.000437003	LINK	che-3 encodes a dynein heavy chain (DHC) 1b isoform that affects the establishment and maintainance of the structural integrity of sensory cilia, and that also has a role in intraflagellar transport; CHE-3 is expressed in ciliated sensory neurons.
WBGene00000646	col-70	H17B01.2	7	22	25	78	77	36	10	14	18	10	1	1	2.04679	0.00160475	-2.22614	0.00722473	LINK	none available
WBGene00003165	mec-1	T07H8.4a	16	33	21	85	91	68	13	20	11	28	18	19	2.04531	1.01411e-06			LINK	mec-1 encodes proteins with multiple disulfide-linked EGF and Kunitz domains; MEC-1 activity is required for normal mechanosensory behavior, and specifically for: 1) localization of the touch receptor degenerin channel complex, 2) accumulation of MEC-5/collagen into the extracellular matrix surrounding touch receptor neurons, and 3) attachment of touch receptor processes to the body wall; mec-1 p…
WBGene00021792	Y52D5A.1	Y52D5A.1	1	8	9	19	24	20	1	5	1	6	6	8	2.03882	0.0215058			LINK	none available
WBGene00019216	H20J04.1	H20J04.1	8	26	29	78	79	64	15	27	13	18	21	21	2.03864	0.000219583			LINK	none available
WBGene00007948	C35A5.4	C35A5.4	9	27	16	61	64	55	14	16	9	12	10	14	2.03671	6.50844e-05			LINK	none available
WBGene00019212	H19M22.3	H19M22.3a	74	40	29	191	194	110	17	11	12	25	22	24	2.03603	7.95976e-06			LINK	none available
WBGene00011548	T06G6.6	T06G6.6a	111	23	17	169	202	148	9	10	10	14	18	21	2.03499	0.00494131			LINK	none available
WBGene00003554	nas-38	F57C12.1	32	46	45	173	158	98	20	9	7	14	15	17	2.03397	3.6025e-08			LINK	nas-38 encodes an astacin-like metalloprotease; loss of nas-38 activity via RNAi in an rrf-3 mutant background results in an extended life span.
WBGene00044434	Y18H1A.15	Y18H1A.15	3	21	13	48	49	31	14	8	15	3	4	5	2.03294	0.00586802	-1.98451	0.0109275	LINK	none available
WBGene00021793	Y52D5A.2	Y52D5A.2	2	8	3	23	11	11	2	4	6	3	0	1	2.03155	0.0398897			LINK	none available
WBGene00017560	F18C5.5	F18C5.5	25	17	19	84	73	55	19	10	17	21	18	37	2.03061	1.17735e-06			LINK	none available
WBGene00011949	T23F6.1	T23F6.1	33	17	14	76	98	46	14	4	4	14	8	16	2.02701	0.000224219			LINK	none available
WBGene00003548	nas-30	Y95B8A.1	168	163	149	597	630	421	68	51	68	120	96	89	2.01767	7.14931e-19			LINK	nas-30 encodes an astacin family zinc metalloprotease with a single EGF domain and a CUB domain; nas-30 is expressed in the intestine and hypodermis.
WBGene00013496	Y70D2A.1	Y70D2A.1	8	15	23	65	61	34	14	15	6	43	23	54	2.01747	0.000877882	1.36863	0.00594622	LINK	none available
WBGene00009791	F46F3.3	F46F3.3a	29	5	3	47	29	50	10	8	11	14	10	20	2.01554	0.0327366			LINK	none available
WBGene00007935	C34E11.2	C34E11.2a	9	24	3	59	46	16	4	3	3	13	6	9	2.01388	0.0279941			LINK	none available
WBGene00044448	ZK783.6	ZK783.6	2	15	8	30	32	23	3	5	3	2	5	1	2.01245	0.0118975			LINK	none available
WBGene00016751	C48E7.6	C48E7.6	22	32	42	125	103	103	42	29	38	130	118	134	2.01144	7.00109e-08	1.43789	6.94422e-09	LINK	none available
WBGene00044392	C25H3.16	C25H3.16	6	14	10	26	21	55	5	4	16	10	6	9	2.00971	0.00562669			LINK	none available
WBGene00000666	col-91	F09G8.6	133	368	306	1082	1017	661	81	50	57	57	36	46	2.00741	1.1456e-06			LINK	col-91 encodes a cuticle collagen; loss of col-91 via large-scale RNAi results in no obvious defects.
WBGene00014759	F46A8.1	F46A8.1	8	9	10	31	32	29	9	2	10	53	37	46	2.0042	0.000411123	2.32316	4.07547e-06	LINK	none available
WBGene00022665	ZK154.1	ZK154.1	112	32	31	226	214	153	30	35	25	31	25	31	2.00394	0.00043344			LINK	none available
WBGene00001608	R07B1.8	R07B1.8	9	7	9	27	27	31	8	1	19	14	15	17	2.00082	0.00077316			LINK	none available
WBGene00004130	ketn-1	F54E2.3a	353	532	453	1437	1784	1299	276	283	255	22	34	41	1.99741	1.30388e-17	-3.44369	1.93688e-58	LINK	ketn-1 encodes an ortholog of kettin (in D. melanogaster, SALLIMUS), an invertebrate isoform or paralog of titin; ketn-1 is transcriptionally upregulated two-fold by hypoxia, requires both HIF-1 and VHL-1 for this induction, and contains three predicted HIF-1 binding sites in its predicted 5' regulatory region; ketn-1's induction by hypoxia correlates with upregulation of other genes required for…
WBGene00010072	F54F12.1	F54F12.1	7	33	19	61	68	69	20	13	24	15	16	19	1.99515	0.000740126			LINK	none available
WBGene00021360	Y37E11AL.4	Y37E11AL.4	3	6	5	10	20	17	0	5	2	2	0	1	1.99449	0.0230878			LINK	none available
WBGene00010319	F59B10.3	F59B10.3	32	10	23	73	89	58	5	10	12	14	13	20	1.98874	0.000262198			LINK	none available
WBGene00008314	C54G4.4	C54G4.4	10	6	12	36	36	23	3	4	5	2	3	3	1.98816	0.00149766			LINK	none available
WBGene00004048	plx-2	K04B12.1	20	21	34	100	103	52	31	20	26	10	11	9	1.98756	6.55807e-05	-1.72453	0.000674078	LINK	plx-2 encodes one of two C. elegans plexins, conserved transmembrane proteins that function as semaphorin receptors in both vertebrates and invertebrates; plx-2 activity is essential for proper male tail and epidermal morphogenesis and for normal axon guidance in a select group of neurons, including SDQL; genetic analyses indicate that plx-2 functions with mab-20/semaphorin-2a, efn-4/ephrin-4, an…
WBGene00016286	C31H1.1	C31H1.1	15	40	41	110	114	100	32	31	26	28	10	13	1.98653	1.50294e-05	-1.20796	0.00994198	LINK	none available
WBGene00001612	glr-1	C06E1.4	6	7	7	19	25	23	7	9	8	26	17	18	1.98463	0.00324484			LINK	glr-1 encodes an AMPA-type ionotropic glutamate receptor; GLR-1 activity is required for mediating the behavioral response to light nose touch and the frequency with which animals change locomotory direction in response to sensory cues such as food; GLR-1 is also required for memory formation; GLR-1 and GLR-2, a second AMPA-type ionotropic glutamate receptor, can interact to form functional heter…
WBGene00009356	F33A8.10	F33A8.10	12	11	9	42	43	22	5	9	7	23	14	7	1.98019	0.000859647			LINK	none available
WBGene00016806	C50D2.2	C50D2.2	16	19	22	86	70	36	18	7	5	23	12	22	1.97795	0.000160372			LINK	none available
WBGene00006615	trp-2	R06B10.4a	8	16	6	30	39	30	7	6	9	14	16	16	1.97768	0.00141424			LINK	trp-2 encodes a transient receptor potential (TRP) channel that, along with trp-1 and spe-41, constitutes one of three C. elegans TRPC family members; trp-2, along with trp-1, controls nicotine-dependent behavior.
WBGene00009257	F29G6.1	F29G6.1	15	22	23	81	83	37	8	5	6	15	6	15	1.97517	0.000193009			LINK	none available
WBGene00003533	nas-14	F09E8.6	12	24	18	56	85	38	8	4	8	12	7	9	1.97405	0.000389806			LINK	nas-14 encodes an astacin-like metalloprotease; large-scale expression studies reveal that a nas-14::GFP promoter fusion is expressed in the pharynx.
WBGene00022017	Y61A9LA.5	Y61A9LA.5	5	6	9	25	22	20	12	19	12	75	32	53	1.97166	0.00422121	1.48489	0.000503399	LINK	none available
WBGene00000753	col-180	C44C10.1	183	688	519	1816	1763	1043	147	140	138	40	22	52	1.96959	5.5156e-05	-2.28926	1.58335e-21	LINK	none available
WBGene00021034	W05F2.2	W05F2.2	6	9	10	32	21	30	14	6	12	11	15	13	1.96082	0.00181705			LINK	none available
WBGene00011081	R07B1.9	R07B1.9	11	24	9	62	55	27	3	1	0	5	0	1	1.96047	0.00196971			LINK	none available
WBGene00018162	nspb-3	F38A5.5	4	10	13	36	27	27	5	4	1	3	3	6	1.9604	0.00333765			LINK	none available
WBGene00009846	F48F5.2	F48F5.2	4	14	22	49	39	46	22	12	11	6	5	2	1.96024	0.0043811	-2.16316	0.00341396	LINK	none available
WBGene00003885	osm-5	Y41G9A.1	7	8	2	17	30	8	3	11	5	24	26	28	1.95812	0.0468393	1.65481	0.00720355	LINK	osm-5 encodes the ortholog of the murine polycystic kidney disease gene Tg737 (which encodes the protein Polaris) and human IFT88; osm-5 is required for the proper morphology of the cilia of chemosensory neurons and is involved in intraflagellar transport; the abnormalities in cilia structure in osm-5 mutants lead to defects in several processes like osmotic avoidance, chemotaxis, dauer formation…
WBGene00001091	drh-2	C01B10.1	140	98	102	356	392	366	121	107	85	763	592	713	1.95139	1.29917e-17	2.34148	5.58313e-71	LINK	none available
WBGene00021007	W03F11.4	W03F11.4	28	143	117	315	360	268	91	84	91	28	27	25	1.94808	0.000584824	-2.10675	3.00682e-14	LINK	none available
WBGene00020364	T08E11.8	T08E11.8	5	3	8	18	11	24	1	0	0	36	34	32	1.94703	0.0252566	6.19748	2.22156e-06	LINK	none available
WBGene00010200	F57C7.4	F57C7.4	7	7	3	15	20	20	3	2	8	12	17	10	1.94676	0.0120433			LINK	none available
WBGene00043981	T14E8.4	T14E8.4	14	9	2	21	41	18	7	10	7	21	17	25	1.94549	0.0273485			LINK	none available
WBGene00009155	F26D10.11	F26D10.11	9	5	5	11	33	17	12	4	4	18	22	6	1.93627	0.0258315			LINK	F26D10.11 encodes an ortholog of murine TMHS (mutated in hurry-scurry/hscy mice), a predicted tetraspan membrane protein required for stereociliary function and a possible ortholog of human DFNB53; the cysteine mutated in hscy mice is conserved in F26D10.11.
WBGene00012404	Y6G8.2	Y6G8.2a	17	37	26	90	81	88	5	3	2	45	31	45	1.93554	1.0788e-06	3.20993	2.27251e-07	LINK	none available
WBGene00001626	gly-1	F44F4.6	7	16	15	53	37	34	9	6	3	21	23	22	1.93541	0.000629297	1.5036	0.0196466	LINK	gly-1 encodes a transmembrane glycosyltransferase similar to 2/I N-acetylglucosaminyltransferase; in vitro, GLY-1 demonstrates UDP-Glc:GalB1-3GalNac-R glucosyltransferase activity; gly-1 expression is detected in adult hypodermal seam cells and possibly some neurons adjacent to the anterior bulb of the pharynx; neither gly-1 loss-of-function mutations nor RNA mediated interference (RNAi) result i…
WBGene00003816	asns-1	F25G6.6	28	58	59	175	175	122	8	4	9	6	6	15	1.93348	1.40547e-06			LINK	asns-1 encodes a predicted asparaginyl-tRNA synthetase (AsnRS), a class II aminoacyl-tRNA synthetase that catalyzes the attachment of asparagine to its cognate tRNA and is thus required for protein biosynthesis.
WBGene00016022	C23H3.9	C23H3.9a	82	131	99	358	382	268	64	33	40	183	165	211	1.93303	1.52145e-12	1.65573	7.21502e-13	LINK	none available
WBGene00219278	R09A8.9	R09A8.9	5	4	7	18	15	19	7	7	5	53	38	37	1.92835	0.0130589	2.36854	3.5413e-06	LINK	none available
WBGene00004907	snf-8	ZK829.10	4	3	8	19	21	9	9	2	5	4	2	2	1.92576	0.0374226			LINK	none available
WBGene00017307	F09F9.2	F09F9.2	137	39	19	227	223	171	38	19	35	85	67	91	1.92554	0.00520429	1.02817	0.000900047	LINK	none available
WBGene00206372	B0454.26	B0454.26	2	10	11	16	35	23	2	3	5	12	1	3	1.92514	0.0272384			LINK	none available
WBGene00019152	nspb-6	H04M03.2	12	23	21	55	81	44	3	7	9	4	13	14	1.92498	0.000214824			LINK	none available
WBGene00016429	C35A11.2	C35A11.2	12	7	11	34	33	30	3	4	2	19	13	16	1.92488	0.000673736	2.02346	0.0123106	LINK	none available
WBGene00220250	C09B9.85	C09B9.85	2	11	5	12	19	26	4	1	3	4	2	3	1.92129	0.0381635			LINK	none available
WBGene00015544	C06E8.5	C06E8.5	21	66	51	175	158	111	21	9	17	79	60	86	1.92127	6.20793e-05	1.88298	1.62286e-07	LINK	none available
WBGene00022283	lgc-27	Y74E4A.1a	84	51	38	186	215	151	45	21	17	108	77	112	1.92054	2.52314e-07	1.45396	7.88134e-06	LINK	none available
WBGene00017743	F23F1.2	F23F1.2	9	12	8	42	34	17	2	10	5	4	7	9	1.91824	0.00366416			LINK	none available
WBGene00017577	F18F11.4	F18F11.4	8	10	12	25	41	30	3	3	5	17	11	16	1.91706	0.00151575	1.61751	0.0429648	LINK	none available
WBGene00003515	myo-3	K12F2.1	338	929	846	2371	2474	1914	301	291	300	66	34	49	1.91049	1.28107e-06	-2.96868	4.50053e-61	LINK	myo-3 encodes MHC A, the minor isoform of MHC (myosin heavy chain) that is essential for thick filament formation, and for viability, movement, and embryonic elongation; expressed in body muscle, the somatic sheath cell covering the hermaphrodite gonad, and also expressed in enteric muscle, vulval muscles of the hermaphrodite and the diagonal muscles of the male tail.
WBGene00015605	C08E3.13	C08E3.13	53	11	8	73	89	64	10	3	0	9	14	17	1.90357	0.0156959			LINK	C08E3.13 encodes a novel protein; expression studies indicate that C08E3.13 expression is positively regulated by signaling through the DBL-1/TGF-beta signaling pathway; in situ hybridization experiments reveal that C08E3.13 transcripts are expressed in the intestine and the vulva.
WBGene00013855	ZC116.3	ZC116.3	17	37	32	81	107	84	15	14	12	25	20	27	1.90195	9.7184e-06			LINK	ZC116.3 is orthologous to the human gene CUBILIN (CUBN; OMIM:602997), which when mutated leads to hereditary megaloblastic anaemia 1 (OMIM:261100).
WBGene00023226	B0344.1	B0344.1	3	8	4	12	21	14	4	11	12	54	43	58	1.90167	0.0308647	2.13935	2.5213e-06	LINK	none available
WBGene00044446	C06G4.6	C06G4.6	12	8	14	32	29	47	4	3	15	8	10	9	1.89735	0.0012143			LINK	none available
WBGene00015441	arrd-21	C04E12.12	12	7	3	25	22	22	17	6	10	14	12	12	1.89704	0.0100467			LINK	none available
WBGene00018742	F53B3.3	F53B3.3	9	15	6	40	39	15	6	2	0	3	2	1	1.89668	0.00954192			LINK	none available
WBGene00008949	F19B6.3	F19B6.3	6	6	2	19	8	17	3	5	1	8	2	4	1.89608	0.0436764			LINK	none available
WBGene00003981	pes-8	F18G5.2	105	184	160	539	573	305	109	98	126	197	146	146	1.89359	8.93961e-08			LINK	pes-8 encodes a novel protein that contains a proline-rich region and a predicted transmembrane domain, but no otherwise recognizably conserved domains; pes-8 was identified in promoter trapping screens and based on large-scale RNA-mediated interference (RNAi) screens, appears to be required for egg laying, germline development, locomotion, and regulation of adult lifespan; a pes-8 reporter is ex…
WBGene00000497	chs-2	F48A11.1	41	40	42	139	153	96	28	28	25	24	22	20	1.89306	1.62557e-08			LINK	chs-2 encodes a putative chitin synthase, paralogous to CHS-1; CHS-2 is required for synthesis of chitin lining the inner pharyngeal surface (primarily in the buccal cavity and grinder), while CHS-1 is dispensable for pharyngeal chitin; CHS-2 is also required for normal pharyngeal shape and function, and for larval viability; chs-2(RNAi) animals have abnormally large, misshapen grinders, and arre…
WBGene00014102	best-25	ZK849.4	4	18	21	65	43	29	5	14	8	4	1	8	1.88779	0.0116621			LINK	none available
WBGene00018783	cbs-2	F54A3.4	6	59	59	137	130	125	38	32	34	15	18	27	1.88675	0.0123588	-1.16617	0.00479414	LINK	The F54A3.4 gene encodes a homolog of the human gene CBS, which when mutated leads to homocystinuria (OMIM:236200).
WBGene00008079	C44B9.2	C44B9.2	14	52	31	82	136	82	29	15	29	8	11	14	1.88213	0.000878058	-1.50296	0.00438395	LINK	none available
WBGene00012901	cnp-2	Y46G5A.10	96	321	273	806	792	564	195	181	191	45	31	39	1.881	3.94319e-05	-2.68325	4.47247e-38	LINK	none available
WBGene00019773	M04G7.2	M04G7.2	2	18	27	51	55	43	4	13	15	10	10	10	1.87983	0.027071			LINK	none available
WBGene00044395	R12C12.10	R12C12.10	42	7	4	45	56	62	6	6	13	10	17	18	1.87907	0.0438223			LINK	none available
WBGene00009412	F35E2.5	F35E2.5	4	20	14	40	45	33	10	4	12	8	8	8	1.87632	0.0056756			LINK	none available
WBGene00045269	F46G11.6	F46G11.6	25	5	5	34	45	29	7	7	14	11	7	5	1.87499	0.0257296			LINK	none available
WBGene00010760	K10H10.4	K10H10.4	36	71	61	194	203	126	19	15	28	58	50	55	1.8744	9.87726e-07	1.02641	0.00570962	LINK	none available
WBGene00007170	B0393.5	B0393.5	45	60	46	169	187	112	26	31	28	61	30	63	1.87313	2.10936e-08			LINK	none available
WBGene00022747	ZK470.6	ZK470.6	13	19	5	37	48	28	0	1	3	5	3	1	1.87169	0.00391705			LINK	none available
WBGene00020413	T10E9.3	T10E9.3	118	176	168	514	499	420	52	64	84	154	145	184	1.86723	2.6683e-15			LINK	none available
WBGene00004154	pqn-72	W01B11.5a	30	78	79	222	223	137	20	27	25	17	13	24	1.86662	6.62293e-05			LINK	The protein product of this gene is predicted to contain a glutamine/asparagine (Q/N)-rich ('prion') domain, by the algorithm of Michelitsch and Weissman (as of the WS77 release of WormBase, i.e., in wormpep77).
WBGene00013859	ZC247.1	ZC247.1	112	162	145	377	543	369	157	150	137	223	209	252	1.86347	4.80656e-11			LINK	none available
WBGene00014375	F44D12.11	F44D12.11	5	4	4	14	12	14	1	4	4	11	5	12	1.8583	0.0300323			LINK	none available
WBGene00021608	Y46H3D.1	Y46H3D.1	2	13	15	34	38	21	12	8	10	3	6	3	1.85787	0.0267223	-1.66877	0.0476694	LINK	none available
WBGene00015602	fbxa-158	C08E3.10a	2	11	10	26	17	28	9	6	4	59	46	55	1.85647	0.0238304	2.69245	2.34587e-08	LINK	This gene encodes a protein containing an F-box, a motif predicted to mediate protein-protein interactions either with homologs of yeast Skp-1p or with other proteins; this gene's encoded protein also contains an FTH/DUF38 motif, which may also mediate protein-protein interaction.
WBGene00235381			6	3	4	14	10	16	10	6	3	14	5	13	1.85531	0.0389829			LINK
WBGene00016596	C42D4.3	C42D4.3	114	205	172	596	556	356	69	73	53	163	98	137	1.85355	9.47183e-09			LINK	none available
WBGene00008712	F11E6.9	F11E6.9	49	11	15	81	74	74	8	10	20	7	9	6	1.85034	0.00410858			LINK	none available
WBGene00001570	gei-13	F58A4.11	75	84	104	300	335	174	56	58	63	57	33	43	1.84979	2.2506e-07			LINK	gei-13 encodes a protein, with a BED finger domain (predicted to be DNA-binding) and a glutamine/asparagine-rich domain; GEI-13 physically interacts with GEX-3, and is required for normal body shape, cuticle synthesis, and locomotion.
WBGene00021265	Y22D7AR.12	Y22D7AR.12	6	18	14	40	36	40	12	10	6	5	11	14	1.84802	0.00139252			LINK	none available
WBGene00016356	C33F10.8	C33F10.8	9	49	42	114	93	99	35	25	40	8	11	18	1.84468	0.00283016	-1.79918	0.000101376	LINK	This gene encodes a protein containing an F-box, a motif predicted to mediate protein-protein interactions either with homologs of yeast Skp-1p or with other proteins; its encoded protein also contains a Pfam-B45 motif of presently unknown function.
WBGene00004963	spe-9	C17D12.6a	8	22	11	32	60	31	19	5	11	4	5	2	1.84248	0.0052051	-2.01652	0.0179735	LINK	spe-9 encodes an EGF repeat-containing protein with a short intracellular domain; SPE-9 is required autonomously in sperm for fertilization, and by homology, likely mediates an adhesive or signaling event necessary for proper oocyte fertilization; spe-9 mRNA is detected solely in animals that are engaged in spermatogenesis; in spermatids, SPE-9 is found at or near the cell surface; following sper…
WBGene00012731	Y39G8C.2	Y39G8C.2	9	26	25	64	69	50	14	17	15	13	11	9	1.84223	0.000615803			LINK	none available
WBGene00044158	Y53C12A.8	Y53C12A.8	3	14	16	31	23	47	11	8	1	7	4	4	1.84062	0.019888			LINK	none available
WBGene00019335	K02F6.1	K02F6.1	7	20	9	32	38	38	9	11	17	13	13	7	1.83799	0.00256745			LINK	none available
WBGene00019951	R08C7.8	R08C7.8	5	26	21	58	47	53	17	32	24	23	18	16	1.83731	0.00453374			LINK	none available
WBGene00018268	F41C3.2	F41C3.2	48	30	40	118	141	99	31	29	21	164	145	144	1.83625	2.89252e-07	2.10705	3.08402e-16	LINK	none available
WBGene00020140	ant-1.4	T01B11.4	54	163	198	427	434	407	75	74	108	25	20	13	1.83428	0.000151165	-2.51741	2.75505e-15	LINK	ant-1.4 encodes an ortholog of the human adenine nucleotide translocase ANT genes, the other ANT genes in C. elegans include ant-1.1, ant-1.2 and ant-1.3; phylogenetic analysis indicates that ant-1.4 is specific to C. elegans, resulting from a recent duplication following the speciation of the common ancestor of C. elegans, C. briggsae, and C. remanei; by homology, ANT-1.4 is predicted to mediate…
WBGene00002243	lad-2	Y54G2A.25a	21	18	24	62	70	59	23	6	13	16	22	20	1.83408	5.83086e-06			LINK	lad-2 encodes one of two C. elegans L1CAM molecules; LAD-2 is a noncanonical member of the L1CAM branch of the immunoglobulin superfamily and is most closely related to Drosophila Neuroglian; mutational analyses indicate that lad-2 is required for proper anterior/posterior and dorsal/ventral axonal pathfinding; in regulating axon guidance, LAD-2 functions, in part, as a MAB-20/Sema2 co-receptor w…
WBGene00003933	pat-9	T27B1.2	27	39	41	131	132	62	23	23	26	8	4	10	1.833	6.9126e-05	-2.09981	0.00013857	LINK	none available
WBGene00007552	C13C12.2	C13C12.2	44	15	24	103	95	54	21	13	9	64	49	55	1.83252	0.000921326	1.584	8.07925e-05	LINK	none available
WBGene00006820	unc-89	C09D1.1a	238	495	392	1140	1275	972	225	206	176	142	95	89	1.83042	1.82948e-09	-1.28294	6.51162e-12	LINK	unc-89 encodes several protein isoforms variably characterized by the presence or absence of SH3, DH, PH, immunoglobulin and myosin light chain kinase (MLCK)-like protein kinase domains; during development, unc-89 is required for proper organization of A bands in striated muscle and thus for fully normal locomotion, pharyngeal muscle contractions, and body size; unc-89 is expressed in body wall m…
WBGene00000745	col-172	F38B6.5a	65	9	10	98	87	67	7	6	8	14	19	24	1.83004	0.0311178			LINK	none available
WBGene00001328	epi-1	K08C7.3a	395	703	674	1762	2039	1540	352	353	399	691	548	714	1.82689	1.28087e-10			LINK	epi-1 encodes one of two C. elegans laminin alpha chains; epi-1 affects oogenesis due to its affect on gonad development, and also affects cell migrations, axon extension and GABAergic defasciculation, morphology of the VD and DD motor neurons, body morphology, locomotion, gonad sheath epithelialization, body muscle structure, and germ cell proliferation.
WBGene00018505	F46F5.14	F46F5.14	2	8	7	13	19	19	10	8	6	2	2	4	1.82643	0.0354127	-1.96894	0.0435525	LINK	none available
WBGene00004218	ptr-3	C41D7.2	37	33	33	113	120	77	41	32	36	28	41	32	1.82629	2.60832e-07			LINK	ptr-3 encodes a nematode-specific member of the sterol sensing domain (SSD) proteins, distantly paralogous to Drosophila PATCHED (PTC) and human PTCH (OMIM:601309, mutated in basal cell nevus syndrome); PTR-3 is weakly required for normal molting from L4 to adult stages; PTR-3 is also required for normal adult alae formation, growth to full size, and vulval morphogenesis.
WBGene00021309	Y32G9B.1	Y32G9B.1a	44	45	25	121	139	80	28	22	26	44	22	39	1.82549	5.44973e-06			LINK	none available
WBGene00003437	msp-42	F26G1.8	7	15	15	30	38	43	8	5	11	2	5	2	1.82331	0.00169685			LINK	msp-42 encodes a protein that belongs to a family of proteins called the Major Sperm Proteins (MSPs) that is conserved in nematodes; this family consists of closely related, small, basic proteins that make up 15% of sperm protein; this multigene family consists of over fifty genes, including many pseudogenes; MSPs are involved in both extracellular signaling and cytoskeletal functions during repr…
WBGene00000602	col-13	F15H10.2	506	2035	1579	4798	4306	3282	470	411	439	647	459	511	1.82254	0.000162904			LINK	col-13 encodes a collagen which is expressed in all stages of development, like sqt-3 (col-1), col-3, col-10, col-11, col-12, and col-14; collagen genes with this expression profile may be specifically required to construct the L1 cuticle (and, perhaps, less specifically required for cuticles at other stages); the amino- and carboxyl-terminal cysteine-rich regions of COL-13 are most closely relat…
WBGene00008652	F10D11.6	F10D11.6a	402	415	403	1369	1440	856	150	158	152	257	232	272	1.8222	1.19422e-13			LINK	none available
WBGene00014681	C25D7.14	C25D7.14	3	21	10	20	48	32	0	1	0	5	8	0	1.81999	0.0349457			LINK	none available
WBGene00003104	mab-7	ZC13.4	63	53	31	157	160	120	28	28	48	46	44	46	1.81909	1.44469e-07			LINK	mab-7 encodes a protein with a hydrophobic type II transmembrane region at the N-terminus, an EGF-like motif, a ShKT motif and a long C-terminus; mab-7 is involved in morphogenesis of the male tail, specifically affecting the structural cells, neuronal processes and the hypodermal sheath of the sensory rays, as such, it affects mating in males; a mab-7 promoter-gfp construct is expressed in hypod…
WBGene00020194	T03G6.1	T03G6.1	174	27	39	269	283	163	40	43	50	106	74	105	1.81796	0.0124784			LINK	none available
WBGene00021252	Y22D7AL.14	Y22D7AL.14	25	57	26	123	126	70	42	25	40	50	51	57	1.81356	0.000183212			LINK	none available
WBGene00018472	nep-16	F45E4.7a	17	4	3	26	26	19	11	7	3	32	20	30	1.81136	0.0438094	1.57041	0.00806064	LINK	none available
WBGene00007246	nspb-10	C01G12.6	5	22	23	60	51	39	3	7	6	9	6	7	1.81025	0.00663268			LINK	none available
WBGene00013416	Y64G10A.7	Y64G10A.7a	29	35	42	104	116	96	27	37	29	57	56	60	1.80918	8.59567e-08			LINK	The Y64G10A.7 gene encodes a homolog of the human gene FIBRILLIN-1, which when mutated leads to Marfan syndrome (OMIM:154700).
WBGene00019929	R07C3.13	R07C3.13	13	50	27	85	85	95	25	29	26	15	7	23	1.80741	0.000646649	-1.23068	0.0126433	LINK	none available
WBGene00018500	F46F5.9	F46F5.9	18	54	50	113	128	121	56	55	56	22	13	17	1.80479	0.000145981	-2.06926	3.67901e-09	LINK	none available
WBGene00013965	ZK287.4	ZK287.4a	19	13	20	52	70	32	13	20	13	7	0	3	1.79835	0.00114871	-2.63183	0.00100276	LINK	none available
WBGene00017305	nspb-12	F09F7.8	13	15	17	47	45	41	6	1	8	6	7	5	1.79707	0.000108504			LINK	none available
WBGene00000637	col-61	C01H6.1	27	14	11	59	43	51	11	5	8	17	13	13	1.79674	0.000533118			LINK	none available
WBGene00044724	R02E4.3	R02E4.3	128	54	44	221	143	298	32	27	40	68	44	51	1.79471	0.000484032			LINK	none available
WBGene00007998	C38C6.5	C38C6.5	5	5	4	11	12	18	1	3	2	4	7	4	1.79396	0.0389178			LINK	none available
WBGene00007489	C09G5.7	C09G5.7	11	32	23	68	66	59	21	17	13	17	19	23	1.78812	0.00029675			LINK	none available
WBGene00018111	F36H9.2	F36H9.2	4	3	12	24	16	17	14	14	14	9	8	8	1.78756	0.0452352			LINK	none available
WBGene00006743	unc-3	Y16B4A.1	13	6	12	29	38	24	12	10	13	8	6	10	1.78506	0.00522803			LINK	The unc-3 gene encodes a protein with homology to immunoglobulin (Ig) domain-containing transcription factors such as OLF-1 or SU(H).
WBGene00000023	abt-5	Y53C10A.9	10	73	46	126	125	124	37	32	29	47	25	53	1.78386	0.00693752			LINK	abt-5 encodes a predicted ATP-binding cassette (ABC) transporter that is a member of the ABCA subfamily of transport proteins; ABT-5 is predicted to function as a transmembrane protein that couples energy to transport of various molecules across membranes, but as loss of abt-5 activity via RNAi results in no obvious defects, the precise role of abt-5 in C. elegans development and/or behavior is n…
WBGene00018898	F55F10.1	F55F10.1	1291	1215	1041	2949	4412	2878	2575	2405	2463	821	657	655	1.77607	6.41485e-14	-2.18135	6.28785e-225	LINK	none available
WBGene00003482	mua-3	K08E5.3a	340	602	502	1420	1831	933	282	307	330	204	154	165	1.77528	2.04052e-07	-1.1933	1.80701e-18	LINK	none available
WBGene00016281	C31B8.4	C31B8.4	4	7	4	9	20	14	7	4	2	17	17	15	1.77444	0.0496964	1.5426	0.0420739	LINK	none available
WBGene00006812	unc-80	F25C8.3a	38	49	43	146	140	91	20	24	23	20	18	24	1.77202	2.18117e-07			LINK	unc-80 encodes a novel protein, conserved amongst C. elegans, Drosophila, and vertebrates; unc-79 functions in a pathway with unc-77 and nca-2, which encode alpha-1 subunits of voltage-insensitive cation leak channels, to regulate presynaptic activation and thus, locomotion and the response to specific volatile anesthetics; co-expression of UNC-77 and UNC-80 in HEK293T cells results in increased …
WBGene00019855	R03H10.2	R03H10.2	59	24	18	84	126	79	26	21	9	21	31	25	1.7695	0.00169975			LINK	none available
WBGene00004509	rrf-2	M01G12.12	61	72	54	174	207	157	25	50	46	359	310	331	1.76844	3.64336e-11	2.66941	3.38098e-40	LINK	rrf-2 encodes an RNA-directed RNA polymerase (RdRP) homolog of unknown function; RRF-2 is not obviously required for either somatic or germline RNAi, or for transitive RNAi.
WBGene00007177	oac-1	B0399.2	12	6	6	22	33	14	0	3	2	2	2	6	1.76764	0.022269			LINK	none available
WBGene00021819	Y53G8B.3	Y53G8B.3	5	8	8	26	15	20	3	0	6	15	18	12	1.76727	0.0144058	1.98852	0.0233051	LINK	none available
WBGene00013322	Y57G11C.32	Y57G11C.32	4	7	6	17	21	11	8	5	8	33	21	29	1.76643	0.0314402	1.60008	0.0047302	LINK	none available
WBGene00006666	twk-11	F20A1.7a	6	5	13	22	34	14	6	4	5	13	9	16	1.76498	0.0325293			LINK	twk-11 encodes one of more than 40 TWK (two-P domain K+) potassium channels in C. elegans that contain two pore regions and four transmembrane domains; orthologous to C. briggsae CBG19123 with some similarity to Drosophila CG6004.
WBGene00019932	R07C12.2	R07C12.2	72	128	111	300	282	314	68	78	59	556	450	510	1.76367	1.66637e-10	2.5055	1.46803e-60	LINK	none available
WBGene00006747	unc-7	R07D5.1a	36	50	36	115	141	93	18	15	28	41	28	37	1.76062	3.35781e-07			LINK	unc-7 encodes an innexin required for gap junction formation in invertebrates; UNC-7 is also required for normal locomotion, egg-laying, inhibition of feeding by tapping, avermectin sensitivity, and ivermectin sensitivity, as well as for the antagonism of UNC-79 and UNC-80 activity by volatile anesthetics; unc-7 is genetically required, and transcribed in, neurons rather than muscle cells, from l…
WBGene00022224	set-28	Y73B3B.2	14	4	13	35	27	28	2	16	18	13	18	8	1.75735	0.0105382			LINK	set-28 encodes a moderately sized (240-residue) SET domain-containing protein with no known non-nematode orthologs; SET-28 54% identity to the SET domain of SET-5, and 93% identity to the SET domain of Y57A10A.1, both much larger proteins and thus not strict paralogs; neither set-28(n4953) nor set-28(RNAi) have any obvious phenotypes.
WBGene00001724	grl-15	Y75B8A.20	218	62	57	357	349	254	50	55	54	150	140	162	1.75561	0.0019285	1.13207	2.01949e-07	LINK	grl-15 encodes a hedgehog-like protein, with an N-terminal signal sequence, a central proline-rich low-complexity region, and a C-terminal Ground-like (Grl) domain; GRL-15 is expressed in the reproductive system, vulva, and larval hypodermis; the Grl domain is predicted to form a cysteine-crosslinked protein involved in intercellular signalling, and it has subtle similarity to the N-terminal Hedg…
WBGene00020125	R173.3	R173.3	15	11	6	30	32	29	5	1	5	14	18	25	1.75545	0.00320019	2.01868	0.00784764	LINK	none available
WBGene00020325	bath-46	T07H3.2	10	14	17	45	38	35	10	6	7	24	15	28	1.75435	0.000644194			LINK	none available
WBGene00012979	Y48B6A.5	Y48B6A.5	23	83	61	178	161	138	38	44	49	19	11	16	1.75183	0.000350297	-1.89614	1.23044e-06	LINK	none available
WBGene00012840	grsp-1	Y43F8C.20	33	75	34	137	183	80	35	38	36	42	43	55	1.75068	0.000592972			LINK	none available
WBGene00022417	Y102A11A.7	Y102A11A.7	10	25	15	55	58	29	11	5	1	13	4	17	1.7496	0.00321674			LINK	none available
WBGene00018167	nspb-4	F38A5.10	14	12	8	24	37	35	5	12	6	6	3	5	1.7477	0.00287342			LINK	none available
WBGene00015030	B0207.7	B0207.7	7	51	34	86	76	99	17	12	24	32	22	25	1.74621	0.0112666			LINK	none available
WBGene00010485	ant-1.3	K01H12.2	81	293	224	590	601	502	142	128	124	86	74	75	1.73982	0.000161951	-1.12268	2.33085e-08	LINK	ant-1.3 encodes an ortholog of the human adenine nucleotide translocase ANT genes, the other ANT genes in C. elegans include ant-1.1, ant-1.2 and ant-1.4; by homology, ANT-1.3 is predicted to mediate the exchange of ATP generated in the mitochondria for cytosolic ADP; ANT-1.3 GFP fusion protein is expressed in the intestine and the anterior of the elongating embryo, and in a pair of head neurons …
WBGene00019425	K06A1.2	K06A1.2	9	26	34	64	72	61	17	24	19	18	17	12	1.73877	0.00257954			LINK	none available
WBGene00000903	daf-7	B0412.2	26	32	27	67	113	59	6	14	9	46	37	48	1.73742	0.000128942	1.78752	0.000127169	LINK	daf-7 encodes a member of the transforming growth factor beta superfamily; in C. elegans, DAF-7 functions as part of a signaling pathway that interprets environmental conditions to regulate energy-balance pathways that affect dauer larval formation, fat metabolism, egg laying, and feeding behavior; daf-7 reporter gene fusions are expressed exclusively in the ASI sensory neurons.
WBGene00012102	T27F6.1	T27F6.1	15	25	24	57	62	62	12	14	10	21	13	23	1.7372	4.26835e-05			LINK	none available
WBGene00012379	Y1A5A.1	Y1A5A.1	15	79	62	135	163	141	33	41	28	18	9	18	1.73277	0.00374847	-1.58144	0.000326102	LINK	none available
WBGene00011266	R13H4.8	R13H4.8	24	5	6	33	45	20	4	1	5	7	7	2	1.73165	0.0461636			LINK	none available
WBGene00000401	cdh-9	F59C12.1	11	17	18	35	58	36	15	12	14	14	11	6	1.72761	0.00170962			LINK	cdh-9 encodes a member of the cadherin superfamily of transmembrane glycoproteins that mediate homophilic cell-cell adhesion; as loss of CDH-9 activity via RNA-mediated interference (RNAi) does not result in any abnormalities, the precise role of CDH-9 in C. elegans development and/or behavior is not yet known.
WBGene00002915	let-805	H19M22.2a	529	883	640	1949	2469	1299	628	511	478	71	43	74	1.72328	4.70232e-08	-3.49105	1.71087e-103	LINK	let-805 encodes myotactin, a novel single-transmembrane protein containing extracellular fibronectin repeats; genetic analyses indicate that LET-805 is essential for proper association between hypodermal fibrous organelles and the contractile apparatus of muscle cells; LET-805 is expressed in hypodermal cells and in the pharynx and localizes to basolateral membranes.
WBGene00008875	F15H10.8	F15H10.8	27	9	14	46	55	39	22	18	14	23	25	31	1.7226	0.0033429			LINK	none available
WBGene00018256	cutl-28	F41A4.1	38	14	16	68	66	56	14	15	29	72	58	60	1.72145	0.00119929	1.34257	0.000241231	LINK	none available
WBGene00008155	C47E12.12	C47E12.12	8	10	11	24	26	31	15	11	14	11	11	9	1.71858	0.00410858			LINK	none available
WBGene00015169	B0403.5	B0403.5	64	108	86	254	284	180	43	32	21	74	78	90	1.71665	1.22186e-07			LINK	none available
WBGene00006777	unc-41	C27H6.1a	26	29	43	100	93	82	18	33	16	27	26	37	1.71431	6.79223e-06			LINK	unc-41 encodes an ortholog of Drosophila STONED B (STNB) required for normal locomotion; a beta-strand in the mu-adaptin-like domain of UNC-41 binds the C2A domain of SNT-1, and this binding is required for SNT-1 endocytosis, punctate localization of UNC-41 in neurons, and transgenic rescue of unc-41(e268) animals; UNC-41 is also required for normal secretion of EGL-17 from P6.p cells, and for em…
WBGene00002280	let-2	F01G12.5a	2457	4609	3791	10507	11074	8612	2014	1991	2051	209	177	200	1.71401	1.93145e-10	-3.74832	0	LINK	let-2 encodes an alpha-2 type IV collagen, probably most closely equivalent to the human gene COL4A2 (OMIM:120090) on the basis of biological function; LET-2 is required for embryonic development and is a component of the basement membrane between muscle and hypodermis; LET-2 interacts with UNC-105, a mechanosensory ion channel of the degenerin ion channel superfamily that is expressed in muscle …
WBGene00043053	F47H4.12	F47H4.12	5	4	5	14	11	14	0	4	7	16	11	23	1.71064	0.0466234	1.79965	0.0308637	LINK	none available
WBGene00017430	F13H6.1	F13H6.1a	134	207	232	611	612	378	124	120	141	60	41	62	1.70974	3.08502e-07	-1.6222	6.26216e-14	LINK	none available
WBGene00017545	F18A1.1	F18A1.1	4	14	10	17	29	31	6	11	13	40	22	24	1.70813	0.0239152	1.12864	0.039212	LINK	none available
WBGene00007862	C32C4.1	C32C4.1a	4	9	9	20	27	14	7	3	3	9	8	3	1.70787	0.027842			LINK	none available
WBGene00022032	Y65B4A.9	Y65B4A.9	14	78	63	140	142	147	64	52	49	6	7	16	1.70546	0.00523749	-2.88865	7.28932e-12	LINK	none available
WBGene00020571	lpr-7	T19D7.3	62	11	9	85	84	56	10	10	25	43	34	36	1.70489	0.0423143			LINK	lpr-7 encodes one of seven C. elegans proteins related to the lipocalin family of structurally related, low molecular weight, secreted proteins that bind and transport lipophilic molecules and participate in intercellular signaling.
WBGene00009438	F35G2.5	F35G2.5a	16	2	10	26	20	32	16	8	12	17	15	10	1.70142	0.0497123			LINK	none available
WBGene00019188	H11E01.3	H11E01.3	68	91	79	201	287	166	46	52	58	11	10	11	1.70105	2.49612e-07	-2.66182	2.68511e-11	LINK	none available
WBGene00020388	T10B5.2	T10B5.2	11	29	15	59	42	50	6	6	17	22	17	17	1.70082	0.00128557			LINK	none available
WBGene00018641	F49E10.4	F49E10.4a	14	14	12	35	38	37	8	2	9	20	19	19	1.70027	0.000568458			LINK	none available
WBGene00008086	C44C10.5	C44C10.5	19	14	21	43	55	51	27	21	22	147	114	162	1.69868	0.000270457	2.21367	2.15293e-16	LINK	none available
WBGene00001072	dpy-10	T14B4.7a	413	237	158	797	930	477	193	180	202	473	383	433	1.69759	6.33049e-05			LINK	A cuticle collagen protein that afffects body morphology and movement and genetically interacts with the sqt-1 collagen gene.
WBGene00012199	mltn-3	W02B8.3	10	15	15	38	44	28	2	3	3	3	4	8	1.69555	0.0018532			LINK	none available
WBGene00006058	sst-20	F54C1.9	24	100	93	236	187	177	61	86	78	33	19	41	1.69437	0.00198034	-1.66958	5.28161e-08	LINK	none available
WBGene00001077	dpy-18	Y47D3B.10	602	832	662	2192	2282	1260	333	286	304	153	154	158	1.69103	1.96034e-09	-1.36085	1.29019e-22	LINK	dpy-18 encodes a catalytic alpha subunit of collagen prolyl 4-hydroxylase (P4H) orthologous to human P4H alpha (I) isoform (OMIM: 176710), an alpha subunit of prolyl-4-hydroxylase which is a procollagen modifying enzyme required for exoskeleton formation, morphogenesis and maintenance of body shape; dpy-18 has a critical role in hydroxylation of cuticle collagens during collagen synthesis; dpy-18…
WBGene00000958	dgk-1	C09E10.2a	22	36	40	89	107	73	22	12	31	16	21	19	1.69009	4.90689e-05			LINK	dgk-1 encodes an ortholog of mammalian diacylglycerol kinase theta (DGKQ); dgk-1 activity functions downstream in a serotonin signaling pathway that regulates locomotion and synaptic transmission; in addition, dgk-1 activity negatively regulates egg laying; dgk-1 genetically interacts with the goa-1 and egl-30 signaling pathways; a GFP::DGK-1 reporter fusion protein is expressed in the excretory …
WBGene00003968	peb-1	T14F9.4a	24	42	20	87	100	46	26	18	13	14	5	4	1.68921	0.00103158	-1.71182	0.00726289	LINK	peb-1 encodes a novel DNA-binding protein; during development, peb-1 activity is required for proper morphogenesis of the pharynx, vulva, and hindgut and for normal molting, feeding, and body morphology; in vitro, PEB-1 exhibits sequence-specific DNA binding to a regulatory sequence known as subelement C, which directs pharynx-specific myo-2 expression and in yeast, PEB-1 exhibits modest transcri…
WBGene00022415	Y102A11A.5	Y102A11A.5	213	49	65	339	320	234	64	60	50	44	34	40	1.68901	0.00411074			LINK	none available
WBGene00008967	F20B10.3	F20B10.3	20	7	3	26	33	22	2	1	2	4	1	3	1.68842	0.0478633			LINK	none available
WBGene00014128	ZK892.4	ZK892.4	2	12	8	22	22	16	11	7	5	3	2	2	1.68791	0.047712	-2.10126	0.039212	LINK	ZK892.4 is orthologous to the human gene ALPHA-METHYLACYL-CoA RACEMASE (AMACR; OMIM:604489), which when mutated leads to AMACR deficiency.
WBGene00006947	wrt-1	ZK1290.12	368	77	88	539	584	325	108	129	116	265	211	238	1.6868	0.00925452			LINK	none available
WBGene00022160	Y71G12B.25	Y71G12B.25	207	216	186	627	624	410	69	64	57	43	33	31	1.68556	7.39369e-13	-1.20939	4.90918e-05	LINK	none available
WBGene00009908	F49H6.5	F49H6.5	13	4	6	26	17	20	14	9	19	54	50	61	1.68495	0.0306562	1.60731	5.39346e-05	LINK	The F49H6.5 gene encodes a homolog of the human gene MOCS1A, which when mutated leads to molybdenum cofactor deficiency (OMIM:252150).
WBGene00012547	Y37D8A.5	Y37D8A.5	43	93	91	203	188	229	108	91	94	27	43	32	1.68241	7.23621e-06	-1.88158	7.50608e-12	LINK	none available
WBGene00021151	Y4C6A.1	Y4C6A.1	2	20	14	38	30	30	3	5	13	4	6	5	1.68106	0.0440614			LINK	none available
WBGene00009217	oig-7	F28D1.8	3	9	10	21	22	17	12	7	7	15	6	8	1.67817	0.0308086			LINK	none available
WBGene00016733	phat-2	C46H11.9	60	57	46	152	197	91	20	26	30	57	38	54	1.67629	2.72435e-05			LINK	none available
WBGene00003527	nas-8	C34D4.9	34	39	31	116	84	82	9	17	15	59	43	42	1.67472	6.23945e-07	1.42825	0.000737824	LINK	nas-8 encodes an astacin-like metalloprotease.
WBGene00021084	W08E12.3	W08E12.3	13	6	3	21	23	15	2	2	2	4	3	5	1.67256	0.0444366			LINK	none available
WBGene00020627	T20F5.5	T20F5.5	32	68	52	131	168	110	33	43	48	16	17	17	1.67096	3.15739e-05	-1.68224	1.98008e-05	LINK	none available
WBGene00007611	C15H7.4	C15H7.4	10	23	8	33	31	45	18	18	15	5	3	6	1.66734	0.0076381	-2.25554	0.0007869	LINK	none available
WBGene00015192	B0432.11	B0432.11	3	10	11	23	21	21	5	7	8	2	0	9	1.66686	0.0279508			LINK	none available
WBGene00021396	cutl-24	Y38C1AA.5a	7	43	29	77	82	53	16	15	13	7	8	6	1.66546	0.0153231	-1.43726	0.0284766	LINK	none available
WBGene00011027	R05D7.2	R05D7.2	4	16	7	25	19	28	8	9	7	6	7	7	1.66431	0.029465			LINK	none available
WBGene00044070	set-18	T22A3.4a	101	119	85	295	299	223	75	48	65	297	217	274	1.66407	4.56038e-12	1.68835	3.81504e-20	LINK	set-18 encodes, by alternative splicing, two isoforms of a divergent ortholog of human SMYD1 (OMIM:606846), SMYD2 (OMIM:610663), and SYMD3 (OMIM:608783); SET-18 is paralogous to SET-10, SET-14, and SET-30.
WBGene00000037	ace-3	Y48B6A.8	12	20	19	29	68	39	11	11	9	34	31	26	1.66177	0.00624378	1.17991	0.02088	LINK	ace-3 encodes one of four C. elegans acetylcholinesterases (AChE); ACE-3 represents ~5% of the total AChE activity in C. elegans and in vitro, hydrolyzes acetylthio-, butyrylthio-, and propionylthiocholine substrates with equal efficiency; although loss-of-function mutations in ace-3 result in no obvious defects, animals doubly mutant with ace-1 or ace-2 have slight defects in backward locomotion…
WBGene00020914	sulp-6	W01B11.2	22	27	23	65	65	63	19	25	30	8	3	6	1.66174	7.90197e-06	-2.51341	1.69801e-05	LINK	sulp-6 encodes one of eight C. elegans members of the sulfate permease family of anion transporters; by homology, SULP-6 is predicted to function as an anion transporter that regulates cellular pH and volume via transmembrane movement of electrolytes and fluids; a sulp-6::GFP transcriptional fusion is expressed in the posterior intestine.
WBGene00022145	Y71G12B.5	Y71G12B.5	7	8	6	19	26	11	2	7	9	15	12	14	1.6589	0.0343612			LINK	none available
WBGene00020626	T20F5.4	T20F5.4	44	13	7	68	63	39	35	26	30	31	14	24	1.65884	0.0335424			LINK	none available
WBGene00009178	uggt-2	F26H9.8	24	49	25	101	77	83	22	27	33	57	51	43	1.65837	5.83694e-05			LINK	uggt-2 encodes one of two C. elegans homologs of UDP-Glc:glycoprotein glucosyltransferase (UGGT), an endoplasmic reticulum enzyme involved in quality control of glycoprotein folding; loss of uggt-2 activity via RNAi indicates that uggt-2 is an essential embryonic gene that is also required for regulating the rate of larval developmental; uggt-2 interacts genetically with ire-1 with respect to bas…
WBGene00001071	dpy-9	T21D12.2	380	109	109	570	656	365	39	47	59	173	122	173	1.65774	0.0031657	1.30728	8.02995e-09	LINK	dpy-9 encodes a cuticular collagen family member with similarity to human collagen alpha 5, type IV, and affects body length.
WBGene00020365	T08G2.2	T08G2.2	28	19	24	65	85	40	7	12	10	15	18	20	1.65582	0.00094029			LINK	none available
WBGene00009108	F25D1.3	F25D1.3	12	8	5	14	21	31	1	7	2	7	4	10	1.65405	0.0316254			LINK	none available
WBGene00009205	F28C6.5	F28C6.5	44	13	19	65	90	47	18	19	26	31	36	33	1.65117	0.00832984			LINK	none available
WBGene00000728	col-155	F55C10.3	468	1497	1172	3251	2957	2163	649	536	638	384	328	356	1.65093	0.000137092	-1.14552	9.62478e-33	LINK	none available
WBGene00008277	mltn-12	C53B4.8a	38	30	27	76	91	85	18	33	27	91	71	84	1.64983	2.6012e-06	1.27201	5.40462e-05	LINK	none available
WBGene00020550	T17H7.1	T17H7.1	102	122	75	297	329	164	17	14	28	11	11	6	1.64873	5.30181e-06	-1.43055	0.014793	LINK	none available
WBGene00015026	B0207.1	B0207.1	6	16	24	34	45	44	15	5	20	12	8	12	1.64448	0.01358			LINK	none available
WBGene00017571	jmjd-3.1	F18E9.5a	58	70	77	179	231	134	82	59	73	97	80	73	1.64316	1.58257e-06			LINK	tag-279 encodes, by alternative splicing, two isoforms of a histone H3 trimethyllysine-27 (H3K27me3) demethylase that is required for normal gonad migration and organization; TAG-279 demethylates H3K27me3 in vitro; TAG-279 contains an N-terminal TonB domain and a C-terminal JmjC domain, and is homologous to human JMJD3, UTX (OMIM:300128), and UTY (OMIM:400009); null tag-279(gk384) and tag-279(gk3…
WBGene00012249	W04E12.4	W04E12.4	4	27	37	54	64	64	17	13	10	15	9	12	1.64114	0.0380768			LINK	none available
WBGene00008508	F01G10.5	F01G10.5	21	74	63	152	137	130	64	47	58	67	56	77	1.64053	0.00105602			LINK	none available
WBGene00008891	clec-42	F16H6.1	28	36	24	65	120	45	9	5	10	19	28	26	1.63869	0.00232094	1.25634	0.0339584	LINK	none available
WBGene00021963	lipl-6	Y57E12B.3	25	10	16	48	56	31	4	7	5	17	14	11	1.63806	0.00540951			LINK	none available
WBGene00001517	gar-1	C15B12.5a	18	9	13	40	34	32	14	8	5	61	23	50	1.63766	0.00274093	1.90046	0.00018784	LINK	gar-1 encodes a G-protein-linked acetylcholine receptor; though gar-1 is most closely related to muscarinic acetylcholine receptors (mAChR), it is pharmacologically distinct from them in its response to certain ligands; gar-1 gene transcripts are expressed at all developmental stages; the GAR-1-GFP fusion protein is expressed in some head neurons and in the PVM neuron; electrophysiological studie…
WBGene00000616	col-39	C09G5.4	374	1630	1243	3188	3238	2141	329	292	329	121	138	100	1.63652	0.0014771	-1.76765	3.8635e-29	LINK	col-39 encodes a collagen that is individually dispensable for viability and gross morphology in mass RNAi screens; the amino- and carboxyl-terminal cysteine-rich regions of COL-39 are most closely related to those of COL-8, COL-19, and COL-35.
WBGene00007343	C05E7.1	C05E7.1	171	99	81	316	253	353	82	62	74	144	112	155	1.63606	2.24384e-06			LINK	none available
WBGene00004906	snf-7	ZK1010.9	13	14	20	32	62	30	8	9	9	4	2	6	1.6357	0.00753565			LINK	none available
WBGene00019761	M03F8.1	M03F8.1	25	14	12	47	50	37	3	4	13	21	14	19	1.63569	0.00159648			LINK	none available
WBGene00019717	trx-3	M01H9.1	34	79	61	185	163	111	59	55	54	125	93	101	1.63503	9.68125e-05			LINK	none available
WBGene00010722	K09E4.4	K09E4.4	27	31	18	74	78	47	19	18	30	35	39	42	1.63446	0.000222485			LINK	K09E4.4 is orthologous to the human gene N-ACETYLGALACTOSAMINIDASE, ALPHA- (NAGLU; OMIM:104170), which when mutated leads to disease.
WBGene00021471	Y39G10AR.15	Y39G10AR.15	15	39	35	89	86	60	34	17	34	2	4	3	1.6339	0.000948216	-3.59362	8.54112e-08	LINK	none available
WBGene00022538	ZC190.4	ZC190.4	92	133	102	284	374	198	81	80	113	59	83	105	1.63249	1.20711e-06			LINK	none available
WBGene00003562	ncr-2	F09G8.4	20	62	59	139	134	99	18	24	36	94	66	80	1.62992	0.00123078	1.24225	0.000102236	LINK	ncr-2 encodes a homolog of human NPC1, which when mutated leads to Niemann-Pick disease, type C (OMIM:257220).
WBGene00011400	T03F6.4	T03F6.4	12	31	25	60	67	51	12	3	8	21	25	19	1.62737	0.0011144			LINK	none available
WBGene00000928	dao-2	M03A1.7	862	235	186	1188	1350	792	299	267	341	398	291	379	1.6266	0.00672989			LINK	dao-2 encodes a (putatively) secreted protein with a DB module; dao-2 is down-regulated in daf-2 mutant adults by comparison with normal adults, and thus may be involved in dauer formation.
WBGene00006845	unc-122	F11C3.2	18	16	22	42	43	62	5	17	10	34	16	23	1.62569	0.000740126			LINK	unc-122 encodes a predicted type II transmembrane protein with extracellular collagen-like domains and a highly conserved olfactomedin (OLF) domain that is found in a family of secreted proteins involved in formation and function of nervous systems; UNC-122 is required for proper locomotion and for normal morphology of the DVB motorneuron, and may regulate neuromuscular function by acting in an a…
WBGene00004719	sad-1	F15A2.6a	22	25	44	81	92	67	26	17	18	26	14	21	1.62144	0.00044193			LINK	sad-1 encodes a novel serine/threonine protein kinase; SAD-1 activity is required for several aspects of presynaptic development, including termination of axon outgrowth and presynaptic vesicle clustering, in GABAergic motor neurons and the ASI amphid chemosensory neuron; in addition, SAD-1 functions in a complex with STRD-1, with which it physically interacts in vivo, to regulate axonal-dendriti…
WBGene00011880	T21B6.3	T21B6.3	189	236	222	617	701	371	87	64	66	61	34	57	1.6205	1.00395e-07			LINK	The protein product of this gene is predicted to contain a glutamine/asparagine (Q/N)-rich ('prion') domain, by the algorithm of Michelitsch and Weissman (as of the WS77 release of WormBase, i.e., in wormpep77).
WBGene00016133	C26B9.3	C26B9.3	220	119	112	439	435	300	71	121	107	91	68	93	1.62034	4.07895e-06			LINK	none available
WBGene00020396	T10B5.10	T10B5.10	25	36	23	76	79	63	13	10	12	13	14	19	1.61979	1.88252e-05			LINK	none available
WBGene00019586	K09F6.3	K09F6.3	35	128	150	302	286	237	88	87	78	93	80	121	1.61974	0.00305234			LINK	none available
WBGene00001824	hbl-1	F13D11.2a	65	61	63	162	211	119	45	44	49	11	10	10	1.61874	1.61018e-06	-2.52961	9.59899e-10	LINK	hbl-1 encodes a C2H2-type zinc finger transcription factor related to Drosophila hunchback; hbl-1 is a heterochronic gene that plays an essential role in regulating developmental timing during postembryonic development; accordingly, mutations in hbl-1 affect locomotion, egg laying, body morphology, and hypodermal differentiation; hbl-1 is expressed in hypodermal precursor cells, neuronal precurso…
WBGene00016841	magu-3	C50F2.8	21	13	12	31	50	38	16	17	16	39	28	46	1.618	0.00326077			LINK	none available
WBGene00017657	F21C10.7	F21C10.7	164	335	302	670	784	631	168	165	171	825	728	932	1.61736	5.41748e-07	1.92474	9.78447e-67	LINK	none available
WBGene00018115	F36H9.7	F36H9.7	9	5	6	20	20	12	2	6	11	3	5	6	1.61345	0.0389354			LINK	none available
WBGene00020490	tmc-1	T13G4.3	21	37	34	89	85	65	17	6	11	23	20	20	1.61181	6.27069e-05			LINK	none available
WBGene00002067	ifp-1	C43C3.1	263	331	310	763	938	637	155	144	162	617	488	591	1.60963	4.2501e-12	1.50058	1.38838e-37	LINK	ifp-1 encodes a nonessential intermediate filament protein; IFP-1 is predicted to function as a structural component of the cytoskeleton; IFP-1 has no obvious function in RNAi assays.
WBGene00020435	T11F8.4	T11F8.4	10	50	47	100	90	87	26	13	19	12	13	10	1.60167	0.0107636			LINK	none available
WBGene00018148	F37C4.8	F37C4.8	4	12	12	22	25	25	11	9	1	2	5	5	1.59777	0.024464			LINK	none available
WBGene00011251	glb-22	R11H6.3a	12	5	9	22	18	27	3	1	5	20	13	6	1.59671	0.0242672			LINK	glb-22 encodes a globin with no obvious function in mass RNAi assays.
WBGene00009313	F32B4.2	F32B4.2	31	122	89	204	222	193	51	82	67	19	21	13	1.59625	0.00160475	-2.29093	1.26398e-10	LINK	none available
WBGene00013970	ZK337.2	ZK337.2	13	17	25	51	56	35	9	10	6	11	9	7	1.59462	0.00262432			LINK	none available
WBGene00000397	cdh-5	F08B4.2a	34	35	43	89	107	91	31	27	42	53	43	51	1.59231	2.83082e-06			LINK	a homolog of cadherin.
WBGene00016398	C34D4.2	C34D4.2	17	77	104	216	150	149	59	45	53	43	22	29	1.58967	0.0155815	-1.12839	0.000665364	LINK	none available
WBGene00020356	T08B6.9	T08B6.9	43	165	119	259	260	312	93	95	145	70	48	100	1.58761	0.00129622			LINK	none available
WBGene00020066	dhhc-5	R13F6.5	9	11	5	18	25	20	3	10	2	11	12	10	1.58636	0.0230882			LINK	none available
WBGene00016247	C30B5.6	C30B5.6a	22	39	31	103	69	63	33	22	15	34	22	24	1.58538	0.000179688			LINK	none available
WBGene00022094	Y69A2AR.23	Y69A2AR.23	14	25	19	41	42	64	20	5	16	13	2	13	1.58487	0.00163096			LINK	none available
WBGene00010661	tyr-2	K08E3.1	164	450	366	924	1012	558	130	105	129	68	45	63	1.5842	0.000284739	-1.4297	4.55285e-11	LINK	none available
WBGene00004230	ptr-16	T21H3.2	47	72	102	224	210	135	22	19	17	12	13	18	1.58393	0.000175555			LINK	ptr-16 encodes a nematode-specific member of the sterol sensing domain (SSD) proteins, distantly paralogous to Drosophila PATCHED (PTC) and human PTCH (OMIM:601309, mutated in basal cell nevus syndrome); PTR-16 is partially required for normal molting from L2 to L3 larval stages; however, PTR-16 and PTR-1 together are strongly required for both molting and viability, with double ptr-1/-16 RNAi an…
WBGene00013891	ZC434.3	ZC434.3	105	24	21	131	163	84	26	16	22	25	13	37	1.58392	0.0303006			LINK	none available
WBGene00008783	F14B6.2	F14B6.2	20	18	16	48	57	32	14	21	14	18	18	27	1.5834	0.00141			LINK	none available
WBGene00019184	H10E21.4	H10E21.4	442	137	134	654	596	553	88	57	83	110	108	124	1.5821	0.00169685			LINK	none available
WBGene00006756	unc-17	ZC416.8a	27	23	33	80	78	54	19	18	16	9	14	16	1.58099	0.000145213			LINK	unc-17 encodes a synaptic vesicle acetylcholine transporter (VAChT) highly conserved amongst metazoans including Drosophila and humans (OMIM:600336); UNC-17 is essential for embryonic development, and is required in cholinergic neurons for loading acetylcholine into synaptic vesicles to which UNC-17 is localized; UNC-17 expression may be regulated indirectly by the UNC-4/UNC-37 transcriptional re…
WBGene00020855	hpo-36	T27C4.2	27	29	27	66	95	49	16	21	12	8	8	8	1.58082	0.000420692	-1.41408	0.0240325	LINK	none available
WBGene00000059	acr-20	R06A4.10a	6	9	6	21	21	11	7	13	6	7	10	8	1.57631	0.0426748			LINK	acr-20 encodes an alpha 7-like homomer-forming subunit of the nicotinic acetylcholine receptor (nAChR) superfamily which encode ligand-gated ion channels that regulate fast action of acetylcholine at neuromuscular junctions and in the nervous system; ACR-20 is a member of the DEG-3-like group of nAChR subunits which appears to be unique to nematodes.
WBGene00006441	cpna-4	Y73F8A.19	14	17	15	39	53	24	11	5	7	21	18	19	1.57533	0.00604249			LINK	none available
WBGene00007117	spe-42	B0240.2	12	16	12	37	30	34	12	12	11	11	12	9	1.57508	0.00215307			LINK	spe-42 encodes a novel sperm-specific seven-pass transmembrane protein with many metazoan homologs; SPE-42 has two functional domains, the DC-STAMP (dendritic cell-specific transmembrane protein) which is known to play a role in cell-cell fusion and the C4C4-type RING finger; the presumed Drosophila spe-42 orthologous gene, sneaky, is involved in sperm plasma membrane breakdown after sperm entry;…
WBGene00014241	ZK1251.3	ZK1251.3	6	20	18	49	29	34	15	10	4	2	1	2	1.57479	0.0161399	-2.93364	0.00505543	LINK	none available
WBGene00006754	unc-15	F07A5.7a	3136	6697	5502	13447	14103	11022	2331	2467	2485	269	237	260	1.56855	4.421e-07	-3.62795	0	LINK	The unc-15 gene encodes a paramyosin ortholog; UNC-15 protein physically interacts with MHC A, one isoform of myosin heavy chain (MHC) in striated muscle; UNC-15 accumulation is decreased in the absence of UNC-54 (myosin B), implying that degradation of UNC-15 is inhibited by its binding myosin B; conversely, myosin B (but not MYO-3/myosin A) fails to accumulate in unc-15 mutants.
WBGene00044016	C35A5.10	C35A5.10	32	11	20	53	56	50	9	10	12	16	10	13	1.56828	0.00357049			LINK	none available
WBGene00022018	Y61A9LA.7	Y61A9LA.7	11	11	6	25	20	25	9	3	3	3	12	13	1.56631	0.0142865			LINK	none available
WBGene00000759	col-186	E03G2.4	22	36	20	56	75	63	15	21	9	37	22	41	1.56546	0.000276674			LINK	none available
WBGene00010468	K01D12.9	K01D12.9	152	46	56	224	235	177	30	35	30	27	18	26	1.56503	0.0025399			LINK	none available
WBGene00004255	epac-1	T20G5.5	7	6	5	13	14	18	3	5	3	22	19	36	1.56468	0.0483631	2.41828	0.000413041	LINK	none available
WBGene00017796	F25G6.1	F25G6.1	67	54	38	134	128	135	88	71	86	441	358	358	1.56424	2.37272e-07	1.86501	5.35577e-33	LINK	none available
WBGene00000284	cah-6	T28F2.3	23	39	21	69	93	44	10	13	12	18	11	11	1.56285	0.00202528			LINK	cah-6 encodes a predicted carbonic anhydrase.
WBGene00021036	W05F2.4	W05F2.4a	128	240	245	541	551	451	136	139	131	50	42	40	1.56282	1.10792e-06	-1.99993	3.08182e-19	LINK	none available
WBGene00014201	ZK1053.6	ZK1053.6	9	19	29	42	59	43	9	15	8	5	2	3	1.56272	0.0107537	-2.08643	0.014911	LINK	ZK1053.6 encodes an ortholog of human SLC41A1 (OMIM:610801) and bacterial MgtE; like its orthologs, ZK1053.6 is predicted to transport Mg(2+) into cells; ZK1053.6 is paralogous to K07H8.2 and ZK185.2, and has no obvious function in mass RNAi assays.
WBGene00022227	Y73B3B.5	Y73B3B.5	25	35	30	62	88	74	46	34	54	103	94	115	1.5589	6.83286e-05			LINK	none available
WBGene00008762	ztf-2	F13G3.1	32	29	19	58	90	50	10	21	18	62	44	58	1.55823	0.000936092	1.35399	0.00058669	LINK	none available
WBGene00013651	Y105C5B.11	Y105C5B.11a	6	28	12	43	23	48	11	14	14	8	7	5	1.5581	0.0392098			LINK	none available
WBGene00022760	ZK546.3	ZK546.3	22	76	98	169	161	165	40	36	57	28	25	31	1.5567	0.00604687	-1.03278	0.00364986	LINK	none available
WBGene00022228	Y73B6A.1	Y73B6A.1	6	20	17	29	38	40	5	11	11	26	10	14	1.55611	0.016086			LINK	none available
WBGene00000902	daf-6	F31F6.5	44	23	30	85	95	62	14	15	23	44	34	51	1.55421	0.000361048			LINK	daf-6 encodes a Patched-related protein; daf-6 is required for amphid channel morphogenesis and thus, also for normal morphology of the outer labial sensilla; specifically, daf-6 is required for restricting the amphid sensory compartment diameter; daf-6 mutants display defects in several neuron-mediated functions including dauer larvae formation, chemotaxis, osmotic avoidance, male mating, negati…
WBGene00019517	K08B4.5	K08B4.5	5	6	9	14	16	20	9	15	13	26	27	18	1.55343	0.0471182			LINK	none available
WBGene00015628	best-6	C09B9.3	6	12	11	19	28	25	2	3	7	5	4	3	1.55342	0.0204088			LINK	none available
WBGene00007264	C02F4.4	C02F4.4	80	25	16	106	110	82	25	22	17	19	18	25	1.55129	0.0193543			LINK	none available
WBGene00138711	R07B1.13	R07B1.13	71	26	14	94	91	88	15	22	14	14	15	21	1.55095	0.0150168			LINK	none available
WBGene00010453	fozi-1	K01B6.1	49	67	59	146	180	108	81	62	72	25	23	38	1.55007	5.95992e-06	-1.69873	1.84069e-08	LINK	fozi-1 encodes an unusual zinc-finger protein that has two C2H2 zinc-finger motifs that probably mediate transcriptional regulation along with a glutamine-rich region and a vestigial formin homology 2 (FH2) domain that has lost its ability to polymerize actin but retained its ability to dimerize; during postembryonic development, FOZI-1 acts with MAB-5 and redundantly with HLH-1/CeMyoD to autonom…
WBGene00011261	nphp-4	R13H4.1	10	6	7	16	19	22	4	3	4	35	41	44	1.54929	0.0307643	3.08423	3.0937e-07	LINK	nphp-4 encodes an ortholog of human NPHP4 (OMIM:607215, mutated in juvenile nephronophthisis and Senior-Loken syndrome-4) that is required for normal chemotaxis, lifespan, and male mating behavior; NPHP-4 is expressed in diverse neurons (amphid and phasmid sensory, URX, labial, male lumbar and cloacal ganglia, and male-specific CEM, HOB and RnB); within neurons, NPHP-4 is a ciliary protein, local…
WBGene00009308	F32A11.3	F32A11.3	83	440	302	705	723	613	264	277	270	63	47	50	1.54861	0.00534626	-2.72325	9.43234e-53	LINK	none available
WBGene00012433	Y11D7A.9	Y11D7A.9	203	84	73	307	320	260	55	39	49	119	80	101	1.54644	0.0004997			LINK	none available
WBGene00008929	F18A11.2	F18A11.2	50	27	16	89	91	48	30	29	34	78	71	88	1.54152	0.00682337			LINK	none available
WBGene00006801	unc-68	K11C4.5a	264	312	307	747	794	641	176	174	206	407	326	380	1.54105	1.40417e-16			LINK	unc-68 encodes a ryanodine receptor ortholog that is expressed in body-wall muscle cells and is required for normal body tension and locomotion; unc-68 mutants are flaccid, sluggish, and resistant to ryanodine, but have normal muscle ultrastructure; UNC-68 is dispensable for excitation-contraction coupling itself, but may amplify its calcium signals; the unc-68/kra-1(kh30) mutation is an S1444N s…
WBGene00004764	sel-7	K04G11.2	13	22	8	25	54	25	4	7	6	23	17	31	1.54016	0.0294911	1.67218	0.00810387	LINK	sel-7 encodes a novel protein with two predicted PEST sequences that is conserved in the related nematode C. briggsae and several parasitic nematodes, but has no known homologs in other organisms; sel-7 was identified in screens for suppressors of dominant lin-12 mutations that result in vulvaless and egg-laying defective animals; although loss of SEL-7 function via mutation or RNAi results in no…
WBGene00044068	syd-9	ZK867.1a	57	42	43	119	152	78	44	32	32	144	107	101	1.53684	0.000134125	1.32573	5.76902e-07	LINK	none available
WBGene00010712	K09B11.5	K09B11.5a	10	59	44	87	101	89	42	43	53	7	9	12	1.5346	0.0190187	-2.67202	5.3374e-10	LINK	none available
WBGene00015541	C06E7.4	C06E7.4	63	105	64	219	216	132	56	47	45	45	36	43	1.5338	1.76877e-05			LINK	none available
WBGene00002206	kin-24	K07F5.4	6	49	39	76	77	78	24	18	23	29	11	27	1.53377	0.0386766			LINK	none available
WBGene00003100	mab-3	Y53C12B.5a	7	16	14	36	36	19	14	15	8	6	6	11	1.53256	0.0207867			LINK	mab-3 encodes a DM (Doublesex and MAB-3) domain-containing protein; during development, MAB-3 plays a role in several aspects of male development; specifically, genetic studies indicate that MAB-3 likely augments the functions of the MAB-5 and EGL-5 homeodomain proteins by acting as a transcriptional repressor of ref-1, which encodes a basic helix-loop-helix (bHLH) protein that negatively regulat…
WBGene00002177	jkk-1	F35C8.3	13	12	7	26	28	24	5	4	11	32	32	32	1.53166	0.010909	1.90401	0.000622616	LINK	jkk-1 encodes a member of the MAP kinase kinase superfamily that affects synaptic vesicle localization and is required in type-D motor neurons for normal locomotion; can function in the Hog1 MAP kinase pathway I in yeast as an activator of JNK and is expressed in most neurons
WBGene00012429	Y11D7A.5	Y11D7A.5	68	32	22	76	78	142	8	13	22	46	35	32	1.53136	0.00753408	1.02229	0.0312157	LINK	none available
WBGene00010636	K07F5.8	K07F5.8	5	19	12	23	31	33	9	11	22	10	17	19	1.52158	0.0308746			LINK	none available
WBGene00004971	spe-17	ZK617.3	15	28	29	44	62	69	20	14	18	5	6	3	1.51998	0.00229721	-2.25422	0.000787452	LINK	spe-17 is predicted to encode a hydrophilic serine/threonine rich protein with no significant homology to any known protein; spe-17 is required for the proper development of spermatids into sperm during spermatogenesis and thus for fertility; specifically, spe-17 is required for the correct partitioning of organelles and sperm components into specialized Golgi-derived fibrous body-membranous orga…
WBGene00019644	cpt-4	K11D12.4	91	57	77	191	213	145	48	40	60	170	131	147	1.51952	4.20664e-06	1.22293	4.21256e-08	LINK	none available
WBGene00006444	shn-1	C33B4.3a	64	106	86	222	245	154	80	60	80	34	31	24	1.51776	5.02815e-06	-1.67376	1.43146e-08	LINK	shn-1 encodes the sole elegans SHANK protein and orthlog of vertebrate SHANK3 (SH3 and multiple ankyrin repeat domains 3); shn-1 is required for the regulation of calcium-related behaviors like defecation, pharyngeal pumping and male fertility via the inositol triphosphate receptor, itr-1, and this activity is dependent on the shn-1 ANK-repeat domain; shn-1 is expressed in neurons, pharynx and th…
WBGene00000952	del-1	E02H4.1	10	13	10	29	20	31	8	4	23	35	18	32	1.51544	0.0111768			LINK	del-1 encodes an ion channel protein of the DEG/ENaC (degenerin/epithelial Na+ channel) family; like other members of the degenerin family, DEL-1 is predicted to function as a sensory mechanotransduction channel, however detailed analysis of the DEL-1 mutant phenotype has not yet been reported; DEL-1 is expressed postembryonically in the VA and VB motor neurons and in the FLP sensory neurons; the…
WBGene00011910	T22B3.2	T22B3.2a	49	267	273	491	504	443	195	207	196	9	12	12	1.51449	0.0136888	-4.55748	4.58208e-51	LINK	alg-3 encodes an Argonaute (AGO) protein that is a member of the AGO clade of Argonaute small RNA-binding proteins; together with its paralog, alg-4, alg-3 is required for normal brood sizes at elevated temperatures, specifically for the process of spermiogenesis in which spermatids are converted to mobile ameboid sperm; alg-3/4 is also required for accumulation of male germline-specific 26G-RNAs…
WBGene00000481	cha-1	ZC416.8b	16	33	31	59	86	48	10	16	13	48	30	36	1.50958	0.00335104	1.15555	0.0118687	LINK	cha-1 is part of a gene complex, in which it shares a common promoter and first (noncoding) exon with unc-17 (and is thus coexpressed with unc-17), but in which the two genes encode mutationally separable functions; cha-1 encodes a choline acetyltransferase that synthesizes acetylcholine, is expressed in neurons, and is required for viability, normal growth, locomotion, and sensitivity to acetylc…
WBGene00010723	cpg-7	K09E4.6	235	702	606	1329	1398	1001	202	201	239	165	145	183	1.50709	0.000450127			LINK	cpg-7 encodes a small (116-residue), putatively secreted protein with 11 potential chondroitin attachment sites, 6 of them verified by mass spectrometry.
WBGene00009722	F45D3.2	F45D3.2a	36	57	43	135	107	86	18	15	10	44	30	22	1.50639	2.12034e-05			LINK	none available
WBGene00011838	T19C4.1	T19C4.1	55	11	29	80	91	59	15	17	28	78	54	74	1.50564	0.0225858	1.39993	6.06448e-05	LINK	none available
WBGene00017179	wht-4	F02E11.1	8	53	55	105	86	91	40	50	45	5	10	3	1.50518	0.0361479	-3.26929	4.80404e-11	LINK	none available
WBGene00020237	phat-4	T05B4.3	191	474	350	852	1015	565	107	88	108	77	65	67	1.50267	0.000197306			LINK	none available
WBGene00021886	Y54G2A.21	Y54G2A.21	20	24	19	51	58	42	13	11	17	104	75	88	1.50252	0.000515051	2.32454	1.50176e-11	LINK	none available
WBGene00004129	pqn-42	F53G2.4a	17	31	22	53	65	49	10	22	10	8	8	5	1.4985	0.000836048	-1.38769	0.0497691	LINK	The protein product of this gene is predicted to contain a glutamine/asparagine (Q/N)-rich ('prion') domain, by the algorithm of Michelitsch and Weissman (as of the WS77 release of WormBase, i.e., in wormpep77).
WBGene00004998	spp-13	F08F1.6	109	32	37	113	119	191	51	31	36	37	33	38	1.49496	0.0119507			LINK	none available
WBGene00018498	F46F5.7	F46F5.7	5	16	14	33	23	28	5	15	15	16	7	9	1.49436	0.0279633			LINK	none available
WBGene00018170	nspb-1	F38A5.14	22	23	22	53	51	56	8	4	9	21	7	18	1.49356	0.000180566			LINK	none available
WBGene00001745	gsa-1	R06A10.2	47	88	76	165	216	122	45	52	59	2	7	17	1.49311	0.000175381	-2.95695	2.06722e-10	LINK	The gsa-1 gene encodes a Gs alpha subunit of heterotrimeric G proteins which affects L1 larval stage viability, movement, and egg laying; it is genetically upstream of sgs-1 with respect to neuronal degeneration, as defined by gain-of-function analysis, and is expressed in excitable cells.
WBGene00012689	Y39B6A.30	Y39B6A.30	29	151	123	241	245	238	114	100	90	113	89	139	1.49278	0.0111504			LINK	none available
WBGene00010540	K03H1.5	K03H1.5	86	208	158	368	439	268	83	80	91	124	94	115	1.49138	0.000194599			LINK	none available
WBGene00003514	myo-2	T18D3.4	446	824	590	1691	1772	959	94	85	97	15	16	13	1.49072	1.18445e-05	-3.02078	2.14867e-21	LINK	myo-2 encodes a muscle-type specific myosin heavy chain isoform; myo-2 is expressed in pharyngeal muscle.
WBGene00019089	clec-206	F59A7.1	109	143	142	337	386	217	94	63	103	243	182	208	1.48927	2.99042e-06			LINK	none available
WBGene00000584	cog-1	R03C1.3a	8	13	21	35	42	24	12	14	10	11	6	8	1.48912	0.0235813			LINK	cog-1 encodes the C. elegans ortholog of the vertebrate Nkx6 homeodomain proteins; cog-1 activity is required for multiple aspects of reproductive system development, including connection of uterus to the vulva and vulval cell specification, as well as for specification of left/right asymmetry in the ASE taste receptor sensory neurons where cog-1 acts in ASER to suppress the ASEL cell fate; cog-1…
WBGene00011227	R11.2	R11.2	24	54	40	118	89	74	3	11	11	10	4	8	1.48683	0.000632272			LINK	none available
WBGene00020984	W03D8.1	W03D8.1	6	20	19	31	39	37	15	12	14	6	11	10	1.4865	0.0218864			LINK	none available
WBGene00018374	tag-343	F43B10.2a	82	85	114	229	286	156	64	55	47	26	24	21	1.48492	4.05404e-05	-1.60171	2.01349e-06	LINK	none available
WBGene00013198	Y54E5A.2	Y54E5A.2	26	52	47	93	105	98	24	28	21	66	58	70	1.48155	0.000145032	1.02893	0.00217802	LINK	none available
WBGene00009888	F49E2.5	F49E2.5a	619	1000	863	2142	2330	1405	568	557	587	64	62	65	1.48057	3.72604e-07	-3.54064	3.17017e-136	LINK	none available
WBGene00006449	tag-76	ZK757.3a	66	290	242	492	516	409	203	178	216	13	23	20	1.47966	0.00574194	-3.78127	2.68747e-49	LINK	alg-4 encodes an Argonaute (AGO) protein that is a member of the AGO clade of Argonaute small RNA-binding proteins; together with its paralog, alg-3, alg-4 is required for normal brood sizes at elevated temperatures, specifically for the process of spermiogenesis in which spermatids are converted to mobile ameboid sperm; alg-3/4 is also required for accumulation of male germline-specific 26G-RNAs…
WBGene00000140	anc-1	ZK973.6	724	1062	890	1979	2649	1677	740	817	774	180	191	220	1.4791	1.68793e-08	-2.3555	7.11093e-95	LINK	anc-1 encodes a protein, orthologous to Drosophila MSP 300 and mammalian SYNE1 and SYNE2 proteins; ANC-1 has coiled regions, a nuclear envelope localization domain (the KASH domain) and an actin-binding domain; ANC-1 affects the positioning of nuclei and mitochondria within the cytoskeleton; ANC-1 is expressed in the cytoplasm, but is localized to the nuclear periphery in an UNC-84 dependent mann…
WBGene00018877	aman-1	F55D10.1	300	206	187	569	505	562	101	101	78	581	428	508	1.47901	2.38979e-10	2.05267	1.43505e-45	LINK	aman-1 encodes an ortholog of human lysosomal mannosidase (MAN2B1; OMIM:609458, mutated in alpha-mannosidosis); AMAN-1 is predicted to help digest glycoproteins by removing mannose residues from their N-linked oligosaccharides; AMAN-1 has seven predicted N-glycosylation sites; AMAN-1 is biochemically active in vitro, has optimal activity at pH 4-4.5, and is unaffected by Co(II); however, AMAN-1 e…
WBGene00004225	ptr-11	F56C11.2	158	175	158	436	425	299	74	92	90	56	33	51	1.47674	1.62025e-10	-1.26137	1.40589e-06	LINK	ptr-11 encodes a nematode-specific member of the sterol sensing domain (SSD) proteins, distantly paralogous to Drosophila PATCHED (PTC) and human PTCH (OMIM:601309, mutated in basal cell nevus syndrome); PTR-11 is required for normal growth to full size, locomotion, and vulval morphogenesis.
WBGene00020116	moa-1	R155.2	24	106	113	201	195	182	76	67	72	21	20	15	1.47573	0.0126212	-2.3133	6.92144e-13	LINK	none available
WBGene00011290	R102.3	R102.3	5	23	31	50	42	49	7	6	7	5	9	4	1.47522	0.0449921			LINK	none available
WBGene00017215	F07F6.1	F07F6.1	24	105	96	206	170	157	67	77	77	50	30	52	1.4724	0.0100972	-1.1338	4.03366e-05	LINK	none available
WBGene00020479	T13C2.3	T13C2.3a	38	52	51	115	126	91	17	32	33	125	92	142	1.47142	1.1153e-05	1.74358	1.35965e-09	LINK	none available
WBGene00007176	kcnl-1	B0399.1a	16	37	33	83	82	38	25	14	13	4	7	9	1.47128	0.00973698	-1.74375	0.00734814	LINK	kcnl-1 encodes a small-conductance calcium-activated potassium channel subunit.
WBGene00020576	T19D12.1	T19D12.1	115	321	328	620	739	445	282	259	289	70	87	91	1.46988	0.00155546	-2.11102	4.50019e-37	LINK	none available
WBGene00020992	W03F8.2	W03F8.2	18	28	29	71	55	51	8	14	16	57	42	38	1.46866	0.000671464	1.47095	0.000798837	LINK	none available
WBGene00004210	ptc-3	Y110A2AL.8a	306	586	481	1175	1324	721	193	224	236	79	56	51	1.46792	3.21064e-05	-2.1929	1.29682e-30	LINK	ptc-3 encodes an ortholog of Drosophila PATCHED (PTC) and human PTCH (OMIM:601309, mutated in basal cell nevus syndrome), which defines one of seven paralogous families of sterol sensing domain (SSD) proteins; PTC-3 is strongly required for normal molting from L1 to L3 larval stages; PTC-3 is also required for normal growth to full size and for viability.
WBGene00010285	F58H1.2	F58H1.2	151	51	21	196	135	186	33	28	23	55	37	56	1.46627	0.0369557			LINK	none available
WBGene00010008	F53H4.3	F53H4.3	35	39	36	97	97	64	24	29	18	34	10	30	1.46622	5.75253e-05			LINK	none available
WBGene00164969	K09C8.9	K09C8.9	19	8	8	33	28	21	8	4	9	25	7	11	1.46566	0.0308647			LINK	none available
WBGene00009218	acs-20	F28D1.9	216	255	177	543	626	340	153	153	171	390	339	328	1.46501	1.13764e-06			LINK	acs-20 encodes a protein homologous to the mammalian FATP1 and FATP4 fatty acid transport proteins (FATP)/very long chain fatty acid acyl-CoA synthetases; acs-20 activity is required for proper cuticle development, specifically formation of a cuticle surface barrier that prevents penetration of small molecules; acs-20 may affect cuticle development via its role in incorporation of very long chain…
WBGene00015024	B0205.10	B0205.10	64	318	220	443	506	452	197	168	180	34	38	43	1.4625	0.00791045	-2.61753	1.71124e-34	LINK	none available
WBGene00077521	maf-1	F45H11.6	21	26	20	52	58	46	9	21	17	58	62	43	1.46113	0.000449272	1.42619	0.000611992	LINK	none available
WBGene00008950	wht-5	F19B6.4	20	69	61	126	125	100	36	43	49	28	25	31	1.45973	0.00534653			LINK	none available
WBGene00018031	F35B3.4	F35B3.4	143	131	111	348	320	229	60	48	49	69	56	66	1.45818	7.58591e-09			LINK	none available
WBGene00022810	ZK721.3	ZK721.3	7	14	17	32	36	21	14	3	6	31	26	33	1.45683	0.0270908	1.59796	0.00536958	LINK	none available
WBGene00016130	C26B2.8	C26B2.8	20	11	18	49	43	23	6	2	8	5	7	7	1.45597	0.0159282			LINK	none available
WBGene00021671	Y48G1BM.6	Y48G1BM.6	19	21	21	52	52	38	20	10	31	85	85	92	1.45446	0.00103719	1.74516	2.57395e-07	LINK	none available
WBGene00015046	nlp-34	B0213.17	33	15	16	63	41	45	164	128	154	32	34	27	1.45251	0.0067793	-2.6305	2.25149e-28	LINK	none available
WBGene00000674	col-99	F29C4.8a	42	64	67	144	144	115	36	31	41	11	10	13	1.45243	1.12954e-05	-2.04066	3.11097e-06	LINK	none available
WBGene00004830	slo-1	Y51A2D.19a	39	81	68	146	158	132	31	19	28	36	31	32	1.45201	6.72287e-05			LINK	slo-1 encodes a voltage- and calcium-activated potassium (BK) channel; SLO-1 activity is required for muscle inactivation: mutants have wild-type levels of motor activity, but have less smooth movement and tend to stop and reverse direction; SLO-1 is expressed in neurons and in body wall and vulval muscle; SLO-1 localization in proximity to the EGL-19 L-type calcium channel in muscle membrane is …
WBGene00012289	W05H12.1	W05H12.1	76	96	68	179	255	119	48	43	41	97	74	97	1.452	0.000176105			LINK	none available
WBGene00009949	F53A2.1	F53A2.1	22	16	15	49	42	32	14	11	19	72	42	47	1.45063	0.00321625	1.48851	0.000231324	LINK	none available
WBGene00006640	tsp-14	F39C12.3a	78	148	97	269	279	197	68	86	100	39	37	52	1.44988	1.00098e-05	-1.36492	4.62796e-07	LINK	none available
WBGene00006750	unc-10	T10A3.1a	36	35	27	69	77	80	22	21	25	44	30	39	1.44907	3.41245e-05			LINK	unc-10 encodes a protein with zinc-finger, Q/N-rich, PDZ, and C2 domains that is homologous to vertebrate Rim1, a presynaptic protein which binds, and effects the activity of, synaptic vesicle-associated GTP-Rab3; UNC-10 is required for normal locomotion and synaptic transmission, and localizes to a subdomain of presynaptic termini, where it probably acts to regulate the priming step of presynapt…
WBGene00000553	cmk-1	K07A9.2	21	26	17	66	53	29	18	18	15	18	23	13	1.44793	0.00613769			LINK	cmk-1 encodes a Ca+2/calmodulin-dependent protein kinase I (CaMK1); CMK-1 activity is required, cell autonomously and downstream of the cyclic nucleotide-gated channel TAX-4, for several aspects of AFD thermosensory neuron differentiation, including expression of the gcy-8 guanylyl cyclase and nhr-38 nuclear hormone receptor genes and morphology of the AFD sensory endings; cmk-1 activity is thus …
WBGene00008662	F10G8.2	F10G8.2	7	14	11	25	20	29	7	9	3	8	11	2	1.44772	0.0239588			LINK	none available
WBGene00006771	tln-1	not known	558	863	738	1718	2032	1233	446	417	473	117	103	121	1.44587	2.39875e-07	-2.34615	2.68658e-74	LINK	none available
WBGene00017314	lgc-39	F09G2.5	33	26	19	50	64	65	6	14	19	19	8	14	1.44583	0.000712536			LINK	none available
WBGene00007503	C09H10.9	C09H10.9	9	41	44	77	47	95	20	18	26	21	23	26	1.44345	0.0411233			LINK	none available
WBGene00021858	Y54F10BM.3	Y54F10BM.3	30	99	77	153	184	137	43	56	48	16	17	25	1.44293	0.00327874	-1.72252	2.90971e-06	LINK	none available
WBGene00020966	W03A5.1	W03A5.1	10	36	39	64	71	62	19	26	15	28	10	28	1.44203	0.0172471			LINK	none available
WBGene00008007	C38D4.7	C38D4.7	14	22	16	32	50	37	22	12	13	38	18	40	1.44161	0.00574853			LINK	none available
WBGene00010915	M110.7	M110.7	9	26	42	60	57	63	34	18	20	18	16	21	1.4409	0.0273852			LINK	none available
WBGene00006787	unc-52	ZC101.2a	1153	2655	2256	4950	5607	3392	1126	1050	1092	119	116	112	1.43851	0.000116624	-3.61137	1.5882e-245	LINK	The unc-52 gene encodes perlecan, a protein orthologous to human basement membrane-specific heparan sulfate proteoglycan core protein (HSPG2; OMIM:142461, which when mutated leads to Schwartz-Jampel syndrome or dyssegmental dysplasia); UNC-52 plays essential roles in muscle structure development and regulation of growth factor-like signaling pathways; UNC-52 is synthesized by the hypodermis and l…
WBGene00018787	cutl-20	F54A5.2	16	24	32	68	64	35	17	22	17	30	22	26	1.43705	0.00813181			LINK	none available
WBGene00008851	F15B9.8	F15B9.8	333	66	64	349	386	319	104	77	115	44	44	58	1.43692	0.0369557	-1.3881	2.4885e-08	LINK	none available
WBGene00013033	Y49E10.10	Y49E10.10	23	111	85	197	159	148	96	79	79	34	31	25	1.43639	0.0138238	-1.87064	2.80994e-11	LINK	none available
WBGene00001263	emb-9	K04H4.1a	1966	3832	3410	7204	7729	6210	1670	1605	1625	497	374	405	1.43522	1.11095e-06	-2.32205	1.59907e-204	LINK	emb-9 encodes the alpha-1 chain of Type IV basement membrane collagen most closely equivalent to human COL4A1 (OMIM:120130) on the basis of biological function; EMB-9 forms heterotrimeric Type IV collagen with LET-2, the alpha-2-like chain, and is required for the assembly and/or secretion of LET-2; EMB-9 is essential for embryonic morphogenesis, particularly epidermal elongation, and for larval …
WBGene00021389	Y38A10A.2	Y38A10A.2	73	36	39	103	133	102	8	23	32	78	54	52	1.43398	0.000578715	1.16683	0.00429425	LINK	none available
WBGene00010321	F59B10.5	F59B10.5	57	37	37	107	110	83	18	16	22	48	30	41	1.43375	6.21997e-05			LINK	none available
WBGene00021171	Y8A9A.2	Y8A9A.2	38	13	24	51	78	43	7	5	3	6	0	5	1.43367	0.0167575			LINK	none available
WBGene00013711	Y106G6G.2	Y106G6G.2	25	15	16	42	53	33	14	8	7	58	46	64	1.43283	0.00587057	2.15318	6.00519e-07	LINK	none available
WBGene00015223	B0507.6	B0507.6	16	20	26	50	31	62	6	15	14	36	49	70	1.43185	0.00753408	1.77622	0.000108252	LINK	none available
WBGene00020531	T15B12.2	T15B12.2	10	57	32	83	73	69	37	44	29	27	8	10	1.42993	0.0288882	-1.70397	0.000245174	LINK	none available
WBGene00001863	him-4	F15G9.4a	180	307	332	589	627	662	83	94	73	231	155	236	1.42891	2.22273e-06			LINK	The him-4 gene encodes a large (5198-residue) extracellular protein, called 'hemicentin', that belongs to the immunoglobulin superfamily.
WBGene00011379	T02E1.7	T02E1.7	28	92	63	132	135	149	53	25	30	24	18	32	1.42845	0.00266428			LINK	none available
WBGene00001475	fmi-1	F15B9.7	36	25	24	56	92	45	22	25	33	128	91	113	1.42836	0.00438055	1.67215	1.87046e-09	LINK	fmi-1 encodes a highly conserved cadherin-like protein with unique domain composition of six EGF and two laminin G domains, a GPS cleavage site and seven-pass transmembrane domain; fmi-1 plays a crucial role in pioneer axon navigation as well as pioneer-mediated follower navigation; FMI-1 is required cell autonomously in pioneer and partially non-cell autonomously in the follower; different domai…
WBGene00012635	Y38H8A.1	Y38H8A.1	30	19	19	57	61	37	25	13	16	26	13	18	1.42697	0.00327731			LINK	none available
WBGene00011763	T14B1.1	T14B1.1	108	76	84	195	252	162	26	44	41	97	89	85	1.42311	7.5609e-06			LINK	none available
WBGene00007209	BE10.1	BE10.1	18	64	68	112	107	124	46	41	45	13	15	14	1.42135	0.0112686	-2.02166	2.7256e-07	LINK	none available
WBGene00013170	Y53F4B.24	Y53F4B.24	6	33	29	55	51	49	26	25	30	1	4	4	1.42102	0.0416325	-3.53284	1.11516e-07	LINK	none available
WBGene00021850	Y54F10AM.6	Y54F10AM.6	146	76	50	228	212	173	25	26	35	94	81	90	1.41954	0.00119537	1.25055	1.68842e-05	LINK	none available
WBGene00022423	nhr-41	Y104H12A.1	32	77	55	150	134	88	45	39	34	18	7	18	1.41952	0.00142029	-1.8554	1.19727e-05	LINK	nhr-41 encodes a nuclear receptor of the NR2D1 subfamily that is orthologous to the Drosophila DHR78 nuclear receptor essential for the onset of metamorphosis, and the mammalian TR2 and TR4 receptors which are expressed in androgen-sensitive organs and brain tissue, respectively; by homology, NHR-41 likely functions as a transcription factor that, based upon RNAi experiments, plays a role in the …
WBGene00001650	gon-1	F25H8.3a	112	218	221	407	499	347	151	124	125	163	159	116	1.41903	7.90587e-05			LINK	gon-1 encodes a functional metalloprotease that defines a new sub-family of secreted proteases known as MPT (metalloprotease with thrombospondin type 1 repeats); the other two members of this family are the bovine procollagen I N-protease ( PINP ) and the murine enzyme ADAMTS-1; gon-1 is essential for hermaphrodite gonadal morphogenesis and sequence homology with other metalloproteases suggests t…
WBGene00014085	ZK809.1	ZK809.1	8	42	37	73	77	48	29	22	34	10	8	27	1.41881	0.0417297	-1.29947	0.0106659	LINK	none available
WBGene00017841	F26G1.5	F26G1.5	134	150	111	343	307	244	35	57	46	52	43	54	1.41857	5.44096e-10			LINK	none available
WBGene00194769	Y32B12C.5	Y32B12C.5	10	13	29	45	38	37	16	16	9	59	58	72	1.41786	0.0258929	1.82565	2.47296e-06	LINK	none available
WBGene00012226	W03G11.4	W03G11.4	90	93	84	214	236	154	60	70	86	22	17	42	1.41643	3.23741e-07	-1.79906	4.30825e-08	LINK	none available
WBGene00000170	aqp-2	C01G6.1a	448	569	447	1062	1377	856	360	331	396	171	99	133	1.415	1.09473e-08	-1.81641	1.53438e-38	LINK	aqp-2 encodes, by alternative splicing, two isoforms of an biochemically atypical aquaglyceroporin; when expressed in Xenopus oocytes, AQP-2 increases water permeability 5- to 11-fold, and urea permeability 4.5-fold, but has no effect on glycerol permeability; AQP-2::GFP fusion proteins are expressed predominantly in the excretory cell and more weakly in muscle, motor neurons, and hypodermis; AQP…
WBGene00016462	C35E7.10	C35E7.10a	77	244	196	371	377	420	143	97	131	131	101	101	1.41439	0.00142272			LINK	none available
WBGene00015781	C14F11.6	C14F11.6	163	47	42	207	234	124	58	68	63	89	69	90	1.412	0.0255418			LINK	none available
WBGene00016212	C29F5.3	C29F5.3	14	22	27	51	43	49	18	17	7	19	21	13	1.411	0.00325003			LINK	C29F5.3 encodes a cytidine deaminase; by homology the product of C29F5.3 is predicted to function in deamination of cytidine to uridine.
WBGene00001730	grl-21	ZC168.5	98	117	89	264	229	191	23	35	37	132	91	125	1.40878	3.09414e-09	1.48669	4.00527e-08	LINK	grl-21 encodes a hedgehog-like protein, with an N-terminal signal sequence, a central proline-rich low-complexity region, and a C-terminal Ground-like (Grl) domain; GRL-21 is expressed in arcade cells and hypodermis; the Grl domain is predicted to form a cysteine-crosslinked protein involved in intercellular signalling, and it has subtle similarity to the N-terminal Hedge domain of HEDGEHOG prote…
WBGene00017186	F07B7.2	F07B7.2	101	315	241	526	498	455	110	119	102	321	215	251	1.40855	0.000972388			LINK	none available
WBGene00194695	B0462.5	B0462.5	18	29	27	62	42	63	37	26	26	186	142	170	1.40699	0.0017919	2.10408	5.01534e-18	LINK	none available
WBGene00045036	K08E4.7	K08E4.7	18	24	23	59	29	59	8	19	9	7	8	9	1.40697	0.00674406			LINK	none available
WBGene00194650	C36A4.14	C36A4.14a	21	36	10	45	51	52	25	28	25	124	85	72	1.4062	0.0136738	1.46539	2.22156e-06	LINK	none available
WBGene00017026	D1037.5	D1037.5	20	78	53	130	105	104	60	45	51	63	48	51	1.40547	0.00867003			LINK	none available
WBGene00002348	myo-1	R06C7.10	602	873	737	1844	2000	1117	145	141	160	38	22	25	1.40318	1.46987e-06	-2.77431	1.57495e-30	LINK	none available
WBGene00003763	nlp-25	Y43F8C.1	8	19	35	61	42	39	8	6	4	16	21	19	1.40196	0.044378			LINK	none available
WBGene00007462	C08H9.1	C08H9.1	13	15	11	29	30	28	11	5	7	39	46	50	1.39967	0.00946245	2.19156	6.89213e-06	LINK	none available
WBGene00002039	hum-6	T10H10.1	95	161	175	336	424	207	95	87	96	78	81	70	1.39729	0.000646649			LINK	hum-6 is orthologous to the human gene MYOSIN VIIA (MYO7A; OMIM:276903), which when mutated leads to Usher syndrome type IB.
WBGene00022100	Y69A2AR.31	Y69A2AR.31	66	63	54	145	138	125	32	31	41	19	13	14	1.39569	5.51984e-08	-1.55495	0.000214411	LINK	none available
WBGene00009304	eva-1	F32A7.3a	67	55	61	150	157	102	29	38	46	202	192	195	1.3946	1.67071e-05	2.01183	2.78219e-19	LINK	eva-1 encodes, by alternative splicing, two isoforms of a cell-surface protein that acts cell-autonomously with SAX-3 as a SLT-1 receptor subunit, and is required for guidance of the AVM pioneer axon to the ventral nerve cord; EVA-1's long isoform is predicted to have a signal sequence, an ectodomain with two lectinlike galactose-binding sequences, a single transmembrane sequence, and a cytodomai…
WBGene00010241	F58D2.2	F58D2.2	24	204	163	299	289	285	123	116	142	26	19	21	1.39384	0.0492077	-2.9066	4.85574e-28	LINK	none available
WBGene00019617	K10C2.1	K10C2.1	841	1870	1500	3233	3776	2354	1232	1163	1319	71	78	72	1.39242	9.03564e-05	-4.44524	4.62575e-299	LINK	none available
WBGene00014179	ZK1010.5	ZK1010.5	39	223	176	383	356	239	152	141	141	25	12	15	1.39223	0.0265116	-3.44736	4.12598e-35	LINK	none available
WBGene00004224	ptr-10	F55F8.1	59	22	22	74	90	64	8	13	15	70	54	72	1.3913	0.0119577	2.06347	1.17091e-07	LINK	ptr-10 encodes an ortholog of Drosophila and human PTCHD3, which defines one of seven paralogous families of sterol sensing domain (SSD) proteins; PTR-10 is weakly required for normal molting from L4 to adult stages; however, PTR-10 in conjunction with PTR-1 and PTR-6 is strongly required for both molting and viability, with triple ptr-1/-6/-10 RNAi animals showing pronounced molting defects and …
WBGene00022700	ZK353.4	ZK353.4	9	27	25	45	44	47	14	13	23	22	22	24	1.39106	0.0155186			LINK	none available
WBGene00020735	T23F2.2	T23F2.2a	39	56	58	100	133	107	12	17	16	111	93	129	1.3897	7.31991e-05	2.50657	6.11336e-15	LINK	none available
WBGene00018861	cutl-21	F55A4.10	8	10	6	17	18	18	9	7	3	32	35	35	1.38859	0.0496882	2.0523	0.000206514	LINK	none available
WBGene00008776	F13H10.5	F13H10.5	15	8	13	23	35	22	16	17	9	72	49	56	1.38786	0.033129	1.68432	1.94725e-05	LINK	none available
WBGene00017387	mpst-4	F11G11.9	18	95	72	135	141	134	33	36	67	27	20	32	1.38722	0.0235558	-1.15684	0.00243502	LINK	none available
WBGene00017576	cdh-8	F18F11.3	17	37	23	64	68	38	22	17	25	23	32	27	1.38652	0.00780392			LINK	cdh-8 encodes a cadherin that may be nematode specific; CDH-8 is predicted to function as a membrane protein that plays a role in cell adhesion and/or morphogenesis, but as loss of cdh-8 activity via mutation or large-scale RNAi experiments results in no obvious abnormalities, the precise role of cdh-8 in C. elegans development and/or behavior is not yet known.
WBGene00008650	F10D11.4	F10D11.4	7	29	16	31	41	42	8	11	11	17	10	14	1.38466	0.0404724			LINK	none available
WBGene00001410	feh-1	Y54F10AM.2a	33	66	48	125	120	80	15	17	34	17	22	20	1.38388	0.00063823			LINK	feh-1 encodes the single C. elegans member of the Fe65 protein family that affects embryonic and larval viability and pharyngeal pumping; the PTB2 domain binds to cytosolic domain of C. elegans APL-1 in vitro; expressed in the neuromuscular structures of the pharynx and in a subset of neurons.
WBGene00018999	F57B9.8	F57B9.8	23	66	54	112	89	116	31	24	26	68	40	51	1.38363	0.00350582			LINK	none available
WBGene00013959	ZK265.7	ZK265.7	56	26	17	72	81	64	33	50	47	92	61	54	1.38217	0.0117643			LINK	none available
WBGene00013701	Y106G6D.4	Y106G6D.4	8	29	23	51	31	51	12	12	11	34	29	33	1.38118	0.0329092	1.07741	0.0262841	LINK	none available
WBGene00001245	elo-7	F56H11.3a	19	45	35	86	71	62	17	34	19	33	31	23	1.38106	0.00241937			LINK	The elo-7 gene encodes a paralog of elo-1 and elo-2, each of which encodes a polyunsaturated fatty acid (PUFA) elongase; ELO-7 has no known function in vivo.
WBGene00012891	sorb-1	Y45F10D.13a	72	73	77	154	188	148	13	13	32	52	23	31	1.37993	3.038e-07			LINK	none available
WBGene00018579	acs-16	F47G6.2	30	36	37	67	92	68	20	22	21	22	23	36	1.37916	0.00031206			LINK	none available
WBGene00020567	T19D2.1	T19D2.1	24	121	125	248	189	165	18	42	33	22	25	28	1.37786	0.0307588			LINK	none available
WBGene00000019	abt-1	C24F3.5	18	74	66	103	114	131	46	36	50	67	66	59	1.37522	0.0180181			LINK	abt-1 encodes a predicted ATP-binding cassette (ABC) transporter that is a member of the ABCA subfamily of transport proteins; ABT-1 is predicted to function as a transmembrane protein that couples energy to transport of various molecules across membranes, but as loss of abt-1 activity via RNAi results in no obvious defects, the precise role of abt-1 in C. elegans development and/or behavior is n…
WBGene00006655	tub-1	F10B5.4	14	9	11	28	25	22	13	11	15	39	29	34	1.37496	0.0225609	1.00935	0.03088	LINK	tub-1 encodes a TUBBY homolog that affects fat storage across species including C. elegans; tub-1 functions with kat-1, a 3-ketoacyl-coA thiolase, to affect lipid accumulation; tub-1 is also required for normal life span as tub-1 mutants show extended life span which is dependent on daf-16/FOXO3a; tub-1 interacts with a novel RabGTPase-activating protein RBG-3 and upregulates the activity of a sm…
WBGene00021986	Y59C2A.3	Y59C2A.3	407	345	313	764	896	673	594	533	629	359	249	301	1.37288	2.16363e-11	-1.33064	6.20803e-40	LINK	none available
WBGene00006363	syd-1	F35D2.5a	15	22	17	34	50	34	12	1	8	24	14	32	1.37282	0.00751964	1.359	0.0456765	LINK	syd-1 encodes a protein that contains a Rho-GTPase-like activating domain as well as PDZ and C2 domains; during neuronal development, SYD-1 is required cell autonomously to positively regulate synaptogenesis; in regulating synapse development, SYD-1 functions as a positive regulator of SYD-2/liprin through direct interaction with ELKS-1, a pre-synaptic protein also required for synapse developmen…
WBGene00018073	F35H10.10	F35H10.10	494	669	567	1349	1556	890	338	364	363	429	363	425	1.3728	5.85923e-07			LINK	none available
WBGene00011212	R10E8.6	R10E8.6	41	64	76	125	158	116	42	58	48	24	15	23	1.37227	0.00031966	-1.64736	5.09563e-06	LINK	This gene encodes a protein containing an F-box, a motif predicted to mediate protein-protein interactions either with homologs of yeast Skp-1p or with other proteins; this gene's encoded protein also contains an FTH/DUF38 motif, which may also mediate protein-protein interaction.
WBGene00009865	F49B2.6	F49B2.6	27	22	14	47	56	34	8	17	3	11	7	6	1.36775	0.00710792			LINK	none available
WBGene00019079	rpa-4	F59A3.6	241	306	300	623	635	597	249	234	239	1741	1411	1564	1.36659	1.63378e-13	2.32969	5.86919e-165	LINK	none available
WBGene00016382	C33H5.16	C33H5.16	15	51	32	66	70	77	24	23	20	7	9	14	1.36638	0.0106398	-1.53551	0.00436873	LINK	none available
WBGene00021187	Y9D1A.2	Y9D1A.2	38	28	33	59	93	64	43	38	34	32	33	29	1.3661	0.00121861			LINK	none available
WBGene00019587	K09F6.4	K09F6.4	18	31	22	41	61	52	16	21	20	28	17	32	1.36457	0.00378567			LINK	none available
WBGene00001052	dop-1	F15A8.5a	11	16	9	24	30	24	16	11	13	24	20	29	1.36396	0.0231399			LINK	dop-1 encodes a D1-like dopamine receptor; dop-1 is required cell autonomously in the touch neurons for modulation of mechanosensory behaviors such as tap habituation; in addition, dop-1 is required for regulation of locomotion via antagonism of the DOP-3 D2-like dopamine receptor in cholinergic neurons; when expressed in tissue culture cells, DOP-1 activity is stimulated by dopamine and to a les…
WBGene00002140	inx-18	C18H7.2a	18	14	24	42	45	36	9	8	6	12	8	15	1.36255	0.00698118			LINK	inx-18 encodes a predicted member of the innexin family.
WBGene00013331	Y57G11C.42	Y57G11C.42a	32	67	64	119	126	111	27	19	19	17	19	18	1.36159	0.000544799			LINK	none available
WBGene00006811	unc-79	E03A3.6a	12	33	34	52	71	49	14	27	31	21	10	12	1.35721	0.0180181	-1.13748	0.030747	LINK	unc-79 encodes a novel, conserved protein; unc-79 functions in a pathway with unc-77 and nca-2, which encode alpha-1 subunits of voltage-insensitive cation leak channels, to regulate locomotion and the response to specific volatile anesthetics; unc-79 exerts its effects on these processes, at least in part, by regulating the levels of UNC-77 and NCA-2 proteins; an unc-79::gfp reporter is expresse…
WBGene00018607	F48E3.8	F48E3.8a	38	27	38	85	84	56	22	18	24	107	77	93	1.35663	0.000913841	1.73398	1.23607e-08	LINK	F48E3.8 encodes a polysaccharide deacetylase.
WBGene00020051	R13A5.9	R13A5.9	56	64	50	132	149	87	36	32	36	71	55	69	1.35578	9.64156e-05			LINK	none available
WBGene00017597	F19C7.8	F19C7.8a	22	19	24	40	63	38	6	10	17	18	16	7	1.35495	0.00681535			LINK	none available
WBGene00013415	Y64G10A.6	Y64G10A.6	36	72	41	97	126	97	36	42	47	37	56	43	1.35389	0.00065304			LINK	none available
WBGene00013962	ZK287.1	ZK287.1a	45	34	37	82	111	58	28	29	30	147	131	115	1.35254	0.00154567	1.80353	6.83987e-12	LINK	none available
WBGene00020330	T07H6.1	T07H6.1a	25	24	42	71	74	54	15	14	9	54	45	36	1.35143	0.00326077	1.45073	0.00096683	LINK	none available
WBGene00007987	C36H8.1	C36H8.1	53	308	237	410	470	412	159	162	180	39	29	35	1.35102	0.0262667	-2.66181	1.52162e-33	LINK	none available
WBGene00018135	F37A4.5	F37A4.5	44	132	118	247	211	181	85	116	89	51	55	53	1.35044	0.00371243	-1.24409	1.04769e-06	LINK	none available
WBGene00006367	sym-2	ZK1067.6	111	143	110	255	336	192	93	99	97	61	42	65	1.34978	1.5023e-05	-1.16895	8.70191e-07	LINK	sym-2 encodes a predicted RNA binding protein that contains three RNA recognition motifs (RRMs) similar to those of Drosophila Fusilli and mammalian hnRNP F and H; genetic analyses indicate that, during embryonic development, sym-2 functions redundantly with mec-8, which also encodes an RRM-containing protein, to affect the structure of body wall muscles or their attachment to the body cuticle, p…
WBGene00018862	wago-2	F55A12.1	649	730	554	1327	1469	1361	796	734	824	1106	870	966	1.34941	3.40516e-19			LINK	none available
WBGene00020732	T23E7.2	T23E7.2a	635	1380	1064	2373	2316	1956	501	496	522	154	114	141	1.34876	1.54727e-05	-2.27396	1.06292e-79	LINK	none available
WBGene00021595	Y46E12BL.2	Y46E12BL.2	537	893	632	1517	1745	1170	1015	860	933	241	197	213	1.34871	5.55825e-07	-2.48599	1.87649e-146	LINK	none available
WBGene00014643	B0391.8	B0391.8	20	14	9	25	38	29	16	8	18	62	42	67	1.3485	0.0262548	1.64692	3.98934e-05	LINK	none available
WBGene00012877	Y45F10C.1	Y45F10C.1	9	30	25	40	47	51	17	2	35	9	15	28	1.34835	0.0250794			LINK	none available
WBGene00015356	tag-278	C02F12.7	115	120	80	237	273	164	87	71	79	424	359	422	1.34398	1.85677e-05	1.97004	6.58231e-39	LINK	none available
WBGene00020841	T27A3.5	T27A3.5	40	131	132	239	206	212	107	87	68	66	47	48	1.34364	0.00734556	-1.08764	4.30378e-05	LINK	none available
WBGene00008047	lact-7	C40H5.4	28	15	15	35	55	34	13	2	9	7	16	12	1.34173	0.018449			LINK	lact-7 encodes a beta-lactamase domain-containing protein.
WBGene00017557	nep-11	F18A12.8a	54	80	76	172	154	126	56	30	44	24	18	22	1.33912	1.18033e-05	-1.39617	0.000239176	LINK	F18A12.8 encodes two isoforms of a neprilysin; neprilysins are thermolysin-like zinc metallopeptidases, found on the outer surface of animal cells, that negatively regulate small signalling peptides (e.g., enkephalin, tachykinin, insulin, and natriuretic peptides) by cleaving them; F18A12.8A is closely paralogous to ZK20.6, and orthologous to CG9761 in Drosophila melanogaster; F18A12.8 is homolog…
WBGene00022578	ZC262.1	ZC262.1	9	12	16	32	25	23	0	8	0	0	5	7	1.33817	0.0283625			LINK	none available
WBGene00022090	Y69A2AR.19	Y69A2AR.19	56	356	305	534	501	508	193	207	203	91	58	100	1.33802	0.0352849	-1.66463	5.29841e-20	LINK	none available
WBGene00010920	M117.4	M117.4	25	56	55	115	102	76	56	52	69	15	11	13	1.3367	0.0033405	-2.55844	3.78107e-12	LINK	none available
WBGene00019146	H02F09.3	H02F09.3	7	18	15	39	27	20	29	46	42	6	4	4	1.33428	0.0490325	-3.44896	2.56841e-10	LINK	none available
WBGene00018515	F46G11.2	F46G11.2	21	53	54	99	110	66	20	9	12	40	39	44	1.33407	0.0101575	1.21712	0.00653233	LINK	none available
WBGene00009250	F29D10.1	F29D10.1	7	13	11	19	25	22	19	14	16	25	30	27	1.33181	0.0442501			LINK	none available
WBGene00012999	rpoa-1	Y48E1A.1a	652	940	709	1587	1943	1354	1148	1030	1130	386	298	320	1.33052	1.17917e-08	-2.09853	6.78348e-140	LINK	none available
WBGene00021362	Y37E11AL.6	Y37E11AL.6	24	27	27	74	67	26	20	33	53	7	8	7	1.32845	0.0203305	-2.63144	5.02331e-07	LINK	Y37E11AL.6 encodes a predicted secreted protein with two cadherin domains and a C-terminal EGF-like domain.
WBGene00001099	dsc-4	K02D7.4	562	1282	1034	2131	2158	1837	530	518	662	434	383	426	1.32785	6.17325e-05			LINK	dsc-4 encodes the C. elegans ortholog of the large subunit of the microsomal triglyceride transfer protein; dsc-4 affects the length of the defecation cycle and genetically interacts with clk-1 with respect to defecation cycle length, and also with respect to the clk-1- dependent adjustment of defecation cycle length to temperature; a DSC-4::GFP fusion protein is expressed in the intestine beginn…
WBGene00011836	mam-4	T19B10.9	19	15	18	42	47	22	8	16	11	29	17	30	1.3272	0.0216284			LINK	none available
WBGene00022069	eel-1	Y67D8C.5	3915	3339	2722	6627	9070	5369	5455	5090	5434	333	269	279	1.32521	5.86837e-07	-4.55922	0	LINK	eel-1 encodes a predicted Hect E3 ubiquitin ligase that contains multiple domains of similarity to the mammalian Mcl1 ubiquitin ligase Mule; eel-1 (enhancer of efl-1) was identified in a screen for modifiers of the transcription factor efl-1/E2F which is involved in the generation of SKN-1 protein asymmetry in the early embryo, a process essential for proper embryonic patterning; EEL-1 binds SKN-…
WBGene00000962	dhc-1	T21E12.4	3094	3449	2917	6661	7755	5578	4123	4116	4166	1896	1602	1812	1.32143	1.55762e-13	-1.60255	1.16724e-224	LINK	dhc-1 encodes a cytoplasmic dynein heavy chain homolog required in one-cell embryos for pronuclear migration, centrosome separation, centrosome proximity to the male pronucleus, and mitotic spindle orientation, suggesting that DHC-1 helps position the microtubule organizing center; DHC-1 genetically interacts with SPD-5, a coiled-coil centrosomal protein.
WBGene00001707	grh-1	Y48G8AR.1	60	90	71	176	192	99	65	44	50	35	31	52	1.31888	0.000588571			LINK	grh-1 encodes a LSF/GRH transcription factor homolog required for normal cuticular synthesis and embryonic development; both GRH-1 and its Drosophila homolog GRAINYHEAD bind to DNA sites upstream of dbl-1, mab-5, and tdc-1; all three of these target genes are homologs of genes regulated by GRAINYHEAD in Drosophila; grh-1(RNAi) animals die as embryos with soft, defective cuticles, which resembles …
WBGene00007248	catp-4	C01G12.8	87	425	358	621	640	583	226	237	266	26	16	23	1.31849	0.0193177	-3.86865	1.10104e-61	LINK	none available
WBGene00016953	C55C3.3	C55C3.3	49	128	102	238	172	182	273	252	304	49	40	45	1.31823	0.00159998	-3.00518	7.19649e-61	LINK	none available
WBGene00002186	kel-10	T16H12.6	38	216	198	345	327	289	128	131	134	58	41	37	1.31769	0.0362899	-1.91198	3.80067e-17	LINK	none available
WBGene00016765	C49C8.1	C49C8.1	13	56	57	76	94	97	23	24	19	23	11	26	1.31614	0.0385104			LINK	none available
WBGene00003175	mec-12	C44B11.3	212	358	235	635	600	456	194	179	191	84	67	69	1.31424	1.39744e-06	-1.7361	4.80556e-22	LINK	mec-12 encodes an alpha-tubulin; MEC-12 is required for normal mechanosensory response to gentle touch, and specifically for formation of the 15-protofilament microtubule bundle present in the touch receptor neurons; mec-12 interacts genetically with mec-5, which encodes a unique C. elegans collagen secreted by the hypodermis; MEC-12 is highly expressed in the touch neurons as well as in several …
WBGene00003071	lrp-1	F29D11.1	643	698	764	1513	1784	1154	498	531	523	1361	1061	1270	1.314	4.02482e-08			LINK	lrp-1 encodes a low-density lipoprotein (LDL) receptor-like protein most closely related to the vertebrate gp330/megalin/LRP-2 proteins; during development, lrp-1 activity is required in the hyp7 syncytium for completion of molting and for growth beyond the third larval stage; LRP-1 is expressed on the apical surface of the hyp6 and hyp7 syncytia in hermaphrodites and males from hatching through …
WBGene00009522	F38A1.9	F38A1.9	9	19	8	22	27	26	1	1	4	11	17	9	1.31344	0.0467977	2.29421	0.0208471	LINK	none available
WBGene00194670	K07E3.9	K07E3.9	12	28	40	63	42	66	22	15	19	24	19	37	1.31332	0.0306811			LINK	none available
WBGene00023323	K08F11.6	K08F11.6	39	38	36	79	84	75	43	40	60	71	46	53	1.31327	5.64097e-05			LINK	none available
WBGene00014772	F56D5.4	F56D5.4	199	259	238	480	483	503	223	202	211	601	489	607	1.31236	2.4648e-12	1.03692	6.6755e-21	LINK	none available
WBGene00021055	W06A11.4	W06A11.4	91	67	67	139	141	193	200	180	194	405	326	373	1.31221	2.85604e-05			LINK	none available
WBGene00011951	T23F6.3	T23F6.3	23	106	107	156	167	176	23	33	35	24	27	25	1.3102	0.032205			LINK	none available
WBGene00016913	lam-2	C54D1.5	379	673	719	1307	1365	1069	328	314	304	427	365	447	1.30842	3.1836e-05			LINK	lam-2 encodes a laminin gamma subunit; lam-2 activity is required for embryonic development and for regulation of muscle arm extension; loss of lam-2 function via large-scale RNAi screens results in embryonic, larval, and adult lethality, sterility, body morphology defects, and abnormal locomotion.
WBGene00020083	R57.2	R57.2	64	36	48	105	133	73	23	27	38	48	36	33	1.30663	0.00252722			LINK	none available
WBGene00015634	C09D4.3	C09D4.3	53	225	221	356	333	364	130	125	134	117	75	78	1.30602	0.0193811			LINK	none available
WBGene00019466	tos-1	K07B1.6a	1385	1525	1267	2984	3283	2460	2224	2030	2195	3191	2530	2845	1.30444	1.074e-14			LINK	none available
WBGene00044302	F28E10.5	F28E10.5	9	13	12	19	25	27	4	9	7	43	44	55	1.30354	0.0381469	2.45155	7.35667e-07	LINK	none available
WBGene00138721	C54D10.14	C54D10.14a	11	11	11	21	20	28	3	3	9	32	25	19	1.30216	0.0361961	1.97777	0.00238136	LINK	none available
WBGene00007799	nrx-1	C29A12.4a	47	55	37	84	125	79	35	32	42	90	88	90	1.30053	0.000646649			LINK	nrx-1 encodes the C. elegans ortholog of neurexins, presynaptic transmembrane neural adhesion molecules that contain extracellular laminin and EGF domains and play a critical role in synaptic development; genetic analyses suggest that nrx-1 may play a role in regulation of adult lifespan; nrx-1 expression is controlled by daf-2 and daf-16.
WBGene00009705	F44F4.10	F44F4.10	12	37	34	67	55	52	21	18	16	25	29	34	1.2983	0.0204168			LINK	F44F4.1 encodes a nematode-specific sperm protein probably required for a normally high ovulation rate; F44F4.1 has no obvious non-nematode homologs, but does have a putative central coiled-coil domain, and is is paralogous to four other C. elegans proteins (B0207.11, F42G4.6, T08G11.2, and Y81G3A.1); F44F4.1(tm332) hermaphrodites show abnormal egg-laying, retaining significantly fewer eggs than …
WBGene00015560	C07A12.2	C07A12.2	13	13	11	25	24	28	23	21	15	46	53	42	1.29748	0.0227725			LINK	none available
WBGene00002204	kin-21	W08D2.8	11	41	36	46	65	72	15	18	21	18	22	23	1.29694	0.0398095			LINK	none available
WBGene00009101	F25B3.4	F25B3.4	29	71	67	118	113	118	44	35	47	70	42	50	1.29663	0.00279896			LINK	none available
WBGene00007220	C01B9.1	C01B9.1a	26	72	68	139	114	94	17	20	17	40	28	31	1.29212	0.0084013			LINK	none available
WBGene00000942	deb-1	ZC477.9a	537	822	726	1555	1664	1112	317	382	367	104	92	113	1.29131	1.00872e-06	-2.16689	2.43118e-47	LINK	The deb-1 gene encodes a vinculin ortholog highly conserved amongst metazoans including Drosophila, chick, and humans (OMIM:193065); DEB-1 is a muscle attachment protein found in dense bodies, and is required for attaching actin thin filaments to the basal sarcolemma; DEB-1 requires PAT-4/integrin-linked kinase for full assembly into nascent attachments.
WBGene00006876	vab-10	ZK1151.1a	1631	2274	1937	3981	4972	3136	2107	1986	2166	176	110	196	1.29026	2.31975e-07	-4.08159	0	LINK	vab-10 encodes, by alternative splicing, two spectraplakins (VAB-10A and VAB-10B) that are jointly required for mechanical resilience of the epidermis under strain by the contraction of actin microfilaments mechanically linked to fibrous organelles (FOs); VAB-10A/B are, accordingly, required for elongation during embryonic morphogenesis; VAB-10A has C-terminal plectin repeats while VAB-10B has sp…
WBGene00004122	pqn-35	F35D11.2a	122	185	161	358	364	249	63	51	45	37	37	45	1.28944	6.67079e-06			LINK	The protein product of this gene is predicted to contain a glutamine/asparagine (Q/N)-rich ('prion') domain, by the algorithm of Michelitsch and Weissman (as of the WS77 release of WormBase, i.e., in wormpep77).
WBGene00011613	T08D2.8	T08D2.8	47	37	48	79	93	102	46	37	43	144	128	122	1.28904	0.000230529	1.2734	1.01097e-07	LINK	none available
WBGene00004740	scd-2	T10H9.2	29	31	24	66	52	56	23	39	24	54	44	56	1.28896	0.000696613			LINK	scd-2 encodes the homolog of the anaplastic lymphoma kinase (ALK) receptor tyrosine kinase (RTK) (OMIM:105590, involved in the development of non-Hodgkin's lymphoma in humans); the ALK family of receptor tyrosine kinases belong to the insulin receptor superfamily; scd-2 was initially identified in a naturally occuring desert oasis strain of C. elegans that fails to respond to the dauer pheromone …
WBGene00013673	Y105E8A.13	Y105E8A.13a	45	26	22	75	69	48	23	18	20	50	28	59	1.28575	0.00661269			LINK	none available
WBGene00022834	ZK973.8	ZK973.8	15	79	69	133	100	106	40	47	42	98	71	85	1.28498	0.0475062			LINK	none available
WBGene00013879	ZC376.8	ZC376.8	25	68	74	116	107	124	37	44	36	27	19	27	1.28298	0.00977817	-1.06927	0.00449482	LINK	none available
WBGene00011831	T19B10.2	T19B10.2	1231	785	662	2048	2244	1197	416	474	510	726	544	657	1.2783	0.000263766			LINK	none available
WBGene00020353	T08B6.4	T08B6.4	76	439	331	592	621	526	267	261	300	48	53	49	1.27809	0.0337408	-2.83599	5.49261e-56	LINK	none available
WBGene00013771	Y113G7C.1	Y113G7C.1	42	191	169	288	281	260	102	87	101	21	10	13	1.27644	0.0251693	-3.10471	1.80687e-22	LINK	none available
WBGene00000220	atf-2	K08F8.2	30	38	22	59	82	42	14	17	28	22	9	23	1.27458	0.00828793			LINK	atf-2 encodes a cAMP-dependent transcription factor paralogous to CES-2, a bZip-like transcription factor that plays a key role in regulation of apoptosis; atf-2 activity is required for excretory duct cell development and essential for embryonic development; in regulating excretory duct cell development, ATF-2 controls expression of lin-48; in vitro, ATF-2 binds the regulatory regions of LIN-48 …
WBGene00016839	C50F2.5	C50F2.5	29	177	140	219	251	239	98	103	80	35	26	44	1.27394	0.0479131	-1.80936	2.99413e-11	LINK	none available
WBGene00007344	C05E7.2	C05E7.2	174	127	114	302	287	260	58	48	65	70	50	63	1.27222	1.61773e-07			LINK	none available
WBGene00011726	lpr-2	T12A7.5	23	39	43	94	70	53	15	19	20	159	133	161	1.27204	0.00631663	2.69057	9.32279e-22	LINK	lpr-2 encodes one of seven C. elegans proteins related to the lipocalin family of structurally related, low molecular weight, secreted proteins that bind and transport lipophilic molecules and participate in intercellular signaling.
WBGene00013312	hhat-2	Y57G11C.17a	15	15	21	37	40	28	17	6	12	14	16	16	1.27161	0.0169227			LINK	hhat-2 encodes a putative protein-cysteine N-palmitoyltransferase ('hedgehog acyltransferase') orthologous to human HHAT (OMIM: 605743) and GUP1 (HHATL; OMIM:608116), and paralogous to HHAT-1; HHAT-2 is required for normal larval development and fat accumulation in mass RNAi assays; however, because C. elegans has no HEDGEHOG homolog, the substrate and function of HHAT-2 in vivo are unclear.
WBGene00007641	C17E4.1	C17E4.1a	7	24	16	34	30	32	11	9	7	12	18	19	1.27139	0.0484318			LINK	none available
WBGene00010992	R03D7.8	R03D7.8	14	53	44	87	73	68	22	23	23	19	15	19	1.27133	0.0278097			LINK	none available
WBGene00022083	Y69A2AR.12	Y69A2AR.12	25	37	42	76	62	76	73	52	56	119	85	126	1.27092	0.00141841			LINK	none available
WBGene00018926	F56A11.6	F56A11.6	45	217	164	299	316	256	109	111	122	29	34	22	1.27058	0.0263682	-2.37553	2.09671e-19	LINK	none available
WBGene00020134	T01B6.1	T01B6.1	42	46	41	97	92	75	27	40	48	45	35	33	1.27039	6.86185e-05			LINK	none available
WBGene00017555	nep-10	F18A12.6	14	34	35	66	48	57	28	26	29	29	15	21	1.27024	0.0154349			LINK	F18A12.6 encodes a neprilysin; neprilysins are thermolysin-like zinc metallopeptidases, found on the outer surface of animal cells, that negatively regulate small signalling peptides (e.g., enkephalin, tachykinin, insulin, and natriuretic peptides) by cleaving them; F18A12.6 has no clear orthologs in other organisms.
WBGene00001196	egl-30	M01D7.7a	997	1870	1617	3184	3439	2553	1645	1538	1611	519	454	527	1.27004	1.51662e-05	-2.05346	1.86357e-187	LINK	egl-30 encodes an ortholog of the heterotrimeric G protein alpha subunit Gq (Gq/G11 class) that affects viability, locomotion, egg laying, synaptic transmission, and pharyngeal pumping; it genetically interacts with the goa-1 pathway, and is probably expressed ubiquitously, with highest expression in excitable cells.
WBGene00021186	Y9D1A.1	Y9D1A.1	66	65	36	99	133	105	72	64	78	48	49	55	1.26612	0.000554144			LINK	none available
WBGene00013052	scrm-7	Y50E8A.9	12	43	40	78	54	63	19	15	25	23	14	14	1.26482	0.0347682			LINK	scrm-7 encodes a putative phospholipid scramblase homologous to human PLSCR1-5, and paralogous to other C. elegans SCRMs (e.g., SCRM-1); scrm-7(RNAi) animals have no obvious phenotype.
WBGene00013785	nep-23	Y116A8C.4	23	94	75	130	132	129	46	34	31	34	29	37	1.26357	0.0232153			LINK	Y116A8C.4 encodes a neprilysin; neprilysins are thermolysin-like zinc metallopeptidases, found on the outer surface of animal cells, that negatively regulate small signalling peptides (e.g., enkephalin, tachykinin, insulin, and natriuretic peptides) by cleaving them; Y116A8C.4 has no clear orthologs in other organisms.
WBGene00012499	Y24F12A.4	Y24F12A.4	22	27	26	55	42	56	19	19	27	103	88	110	1.26305	0.00251426	1.83687	7.20314e-10	LINK	none available
WBGene00021581	clec-70	Y46C8AL.3	23	24	15	37	44	44	28	23	24	60	62	65	1.25926	0.00705955			LINK	none available
WBGene00011191	R10D12.10	R10D12.10	19	52	36	84	73	60	32	18	26	21	25	24	1.25912	0.0104475			LINK	none available
WBGene00011610	T08D2.5	T08D2.5	19	14	11	31	30	28	23	15	20	61	59	56	1.25788	0.0215336	1.23481	0.000641836	LINK	none available
WBGene00000771	cpb-2	C30B5.3	24	90	115	173	144	154	42	48	62	62	46	57	1.25786	0.0386292			LINK	cpb-2 encodes a cytoplasmic polyadenylation element binding (CPEB) protein homolog, expressed specifically in the spermatogenic germ line; CPB-2 is dispensable for oogenesis, in contrast to CPEBs in vertebrates (Xenopus), arthropods (Drosophila), and molluscs (Spisula), which all participate in oogenesis.
WBGene00003681	nhr-91	Y15E3A.1a	63	74	52	127	156	98	49	40	50	50	34	54	1.25699	0.000163662			LINK	nhr-91 encodes a conserved nuclear receptor that is orthologous to members of the NR6 subfamily of nuclear receptors that includes Drosophila HR4 and human germ cell nuclear factor (GCNF, OMIM:600281, human and mouse GCNF are expressed primarily in the testis); by homology, NHR-91 is predicted to function as a transcription factor that may activate or repress transcription in response to a hormon…
WBGene00009641	F42G4.2	F42G4.2	30	106	90	159	140	159	72	64	69	47	39	58	1.25304	0.015206			LINK	none available
WBGene00017673	F21F3.3	F21F3.3	23	67	47	97	85	94	29	34	24	12	20	16	1.25088	0.00812653	-1.22305	0.00862299	LINK	none available
WBGene00020368	ast-1	T08H4.3	15	13	17	31	31	29	9	3	17	26	11	18	1.24851	0.0187173			LINK	ast-1 encodes one of ten C. elegans ETS-box transcription factors; AST-1 is required cell autonomously for proper initiation and maintenance of dopamine (DA) neuron fate; AST-1 acts to specify DA neuron fate by positively regulating expression of a number of DA neuron-specific genes such as dat-1 and cat-2, which encodes a dopamine transporter and tyrosine hydroxylase, respectively; AST-1 is also…
WBGene00019518	K08B5.1	K08B5.1	25	13	25	47	42	39	22	23	12	28	15	25	1.24812	0.0153249			LINK	none available
WBGene00009306	F32A7.5	F32A7.5a	490	710	693	1425	1392	1004	302	282	377	124	73	140	1.24552	1.07728e-06	-1.89683	1.66121e-31	LINK	none available
WBGene00004751	sea-2	K10G6.3	243	288	295	575	671	418	229	294	298	21	17	42	1.24549	2.85024e-06	-3.74436	5.44399e-57	LINK	sea-2 encodes a zinc finger protein; SEA-2 is an autosomal signal element (ASE) that functions to interpret the X:A chromosomal ratio; in addition, SEA-2 functions autonomously in the intestine to regulate adult lifespan and autonomously in seam cells to regulate larval developmental timing; in regulating lifespan and developmental timing, SEA-2 functions as a post-transcriptional negative regula…
WBGene00006746	unc-6	F41C6.1	52	79	73	158	163	90	47	39	53	54	59	50	1.24484	0.00137546			LINK	unc-6 encodes a netrin orthologous to the human and mouse netrin-1 precursor proteins; UNC-6 functions as a guidance molecule that regulates circumferential axon migrations as well as migration of mesodermal cells, such as the gonadal distal tip cell, along the dorsoventral axis; in addition, UNC-6 mediates anchor cell (AC) invasion by regulating localization of the UNC-40 netrin receptor to the …
WBGene00018575	clec-119	F47F6.5	24	95	82	141	153	110	52	37	38	55	36	53	1.24173	0.0297684			LINK	none available
WBGene00015472	C05D9.3	C05D9.3	126	237	209	437	353	361	60	65	86	59	49	71	1.24156	4.50295e-05			LINK	none available
WBGene00018682	aagr-4	F52D1.1	384	600	554	1020	1235	826	198	151	156	147	118	155	1.23984	9.48747e-06			LINK	none available
WBGene00004910	snf-11	T03F7.1	128	90	103	224	234	186	66	70	52	334	230	316	1.23976	3.93018e-06	1.83711	9.63144e-24	LINK	snf-11 encodes an electrogenic, Na[+]/Cl[-]-coupled, high-affinity GABA transporter that is required in vivo for GABA uptake, and for normal aldicarb sensitivity; SNF-11 is orthologous to human SLC6A1 (OMIM:137165); SNF-11 is selective for GABA with a Kt of ~15 microM, has an EC50 value of 168 microM, is blocked by GAT1 inhibitor SKF89976A, and has a 2:1:1 stoichiometry of Na[+]:Cl[-]:GABA; SNF-1…
WBGene00007934	C34E7.4	C34E7.4	543	613	530	1315	1261	799	231	216	283	245	161	217	1.23786	3.70885e-07			LINK	none available
WBGene00021939	Y55F3BR.2	Y55F3BR.2	168	305	264	541	557	376	241	223	220	108	93	123	1.23585	0.00011649	-1.45749	1.1231e-19	LINK	none available
WBGene00017904	lim-8	F28F5.3a	152	299	223	476	541	324	240	184	208	103	71	94	1.23421	0.00044488	-1.61891	7.56004e-21	LINK	lim-8 encodes proteins containing one PDZ and one LIM domain; in vitro binding and yeast two-hybrid assays indicate that LIM-8 can physically interact with myosin heavy chain A (MYO-3) as well as with UNC-96 and UNC-97, suggesting that LIM-8 is part of a structural component that links membrane attachment proteins to myosin thick filaments; lim-8(RNAi) in a hypersensitive rrf-3 background results…
WBGene00011793	T16A9.3	T16A9.3	43	37	36	71	80	80	12	16	20	61	48	67	1.23369	0.00025737	1.49454	7.41877e-05	LINK	none available
WBGene00019081	F59A3.8	F59A3.8	17	52	74	80	113	95	52	36	41	32	22	27	1.23351	0.049626	-1.05206	0.00332434	LINK	none available
WBGene00009889	F49E11.2	F49E11.2	50	31	23	74	92	40	13	16	13	30	29	45	1.23249	0.0253143			LINK	none available
WBGene00023519	Y60A3A.24	Y60A3A.24	12	19	23	51	23	35	11	4	4	40	30	37	1.23231	0.0450449	2.1141	0.000117178	LINK	none available
WBGene00007049	tag-191	C53A5.4	24	41	25	74	52	53	14	24	13	9	12	6	1.23199	0.00433102	-1.2895	0.0412155	LINK	none available
WBGene00009342	fasn-1	F32H2.5	1835	2415	2070	4494	4823	3262	1274	1321	1275	492	400	381	1.23156	2.15454e-08	-1.9833	4.43691e-112	LINK	fasn-1 encodes a fatty acid synthase, orthologous to human FASN (OMIM:600212); CEP-1 is required for fully normal fasn-1 expression in vivo; CEP-1 drives transcription of luciferase reporters whose promoters contains either of two putative CEP-1 binding sites (FAS-T1 and FAS-T2) found in the fasn-1 gene, and this activity is partially lost by mutation of conserved CEP-1 residues (R298 or H310); i…
WBGene00000951	deg-3	K03B8.9	31	41	29	67	76	57	13	26	21	83	47	80	1.22924	0.00115325	1.40785	0.00010087	LINK	deg-3 encodes an alpha subunit of a nicotinic acetylcholine receptor (nAChR); originally defined by a gain-of-function mutation that results in neuronal degeneration and uncoordinated movement, DEG-3 can form heteromeric channels with a second alpha subunit, DES-2, and in vivo these channels appear to be required for chemosensation of choline; deg-3 and des-2 reside in an operon, and consistent w…
WBGene00195169	Y50D4A.6	Y50D4A.6	12	16	10	21	25	29	12	8	15	19	15	27	1.2285	0.0417904			LINK	none available
WBGene00015177	tmc-2	B0416.1	26	57	69	104	129	71	16	39	26	36	30	42	1.22727	0.0204006			LINK	none available
WBGene00021697	gcn-1	Y48G9A.3	2370	2154	1925	4283	4842	3622	2662	2679	2800	423	310	375	1.224	4.80966e-12	-3.25859	0	LINK	none available
WBGene00015246	scl-23	B0545.3	13	57	34	74	65	66	36	24	31	6	8	7	1.22322	0.0436945	-2.47951	1.6659e-06	LINK	none available
WBGene00006683	twk-31	Y47D3B.5a	29	23	31	58	54	53	16	27	20	8	16	13	1.22252	0.00237277	-1.12992	0.0428123	LINK	twk-31 encodes a member of the two pore-domain potassium channel family; loss of twk-31 activity via RNAi in an rrf-3-sensitized strain results in embryonic lethality, uncoordinated locomotion, and abnormal body morphology.
WBGene00006752	unc-13	ZK524.2a	148	166	139	285	320	289	115	121	123	458	407	442	1.2224	3.57096e-10	1.48909	3.2557e-28	LINK	unc-13 encodes at least five protein isoforms that regulate neurotransmitter release by altering the conformation of syntaxin; UNC-13 proteins are required for normal pharyngeal pumping and thrashing in liquid, normally short lifespan, normally large brood sizes, and full adult body sizes; UNC-13 proteins have orthologs in vertebrates and Drosophila; UNC-13 proteins are complex, with multiple C2,…
WBGene00001814	haf-4	W04C9.1	336	749	652	1295	1289	862	301	287	279	147	106	136	1.22218	0.000889192	-1.53973	9.51487e-27	LINK	haf-4 encodes a half-molecular ATP-binding cassette (ABC) transporter; haf-4 activity is required in embryos and adults for formation of birefringent material in gut granules, lysosome-related fat storage organelles.
WBGene00011278	R74.2	R74.2	136	107	89	266	197	194	40	49	41	120	102	128	1.22156	7.27505e-06	1.04731	2.41155e-05	LINK	none available
WBGene00018232	F40E3.5	F40E3.5	24	85	48	92	112	103	31	31	66	16	13	12	1.21891	0.0211756	-2.00554	4.26736e-06	LINK	none available
WBGene00006814	unc-82	B0496.3a	130	248	264	443	465	366	101	83	77	214	178	231	1.21851	0.000499018			LINK	unc-82 encodes a serine/threonine kinase related to the human ARK5/SNARK (NUAK1/NUAK2) and the PAR-1 and SNF1/AMP-Activated kinase (AMPK) protein kinase families; during development, UNC-82 activity is required for proper organization of internal (membrane-distal) proteins of myosin thick filaments and M-lines in conjunction with embryonic elongation; an UNC-82::GFP reporter fusion is expressed i…
WBGene00012728	Y39G8B.9	Y39G8B.9	181	132	103	293	287	238	69	49	54	43	38	56	1.21847	1.31717e-05			LINK	none available
WBGene00013534	acr-24	Y73F8A.30a	17	13	14	34	34	19	3	9	6	45	37	36	1.21806	0.0415152	2.33029	1.36266e-05	LINK	acr-24 encodes a nicotinic acetylcholine receptor (nAChR) alpha subunit that is a member of the DEG-3 subgroup of C. elegans nAChRs; ACR-24 is thus predicted to function in regulation of fast neurotransmission.
WBGene00022410	Y97E10C.1	Y97E10C.1	504	443	428	1055	1011	650	249	248	249	534	364	420	1.21705	9.36303e-07			LINK	none available
WBGene00000367	cca-1	C54D2.5a	74	63	83	149	165	121	43	49	62	51	45	54	1.21479	8.36248e-05			LINK	cca-1 encodes a calcium channel alpha subunit that is homologous to vertebrate T-type calcium channel alpha 1 subunits; CCA-1 is required for regulation of pharyngeal pumping, specifically for the efficient initiation of action potentials in the pharynx in response to excitatory inputs; a CCA-1::GFP fusion protein is expressed strongly in pharyngeal muscle as well as in many neurons, including pa…
WBGene00003003	lin-14	T25C12.1a	135	234	209	373	450	314	122	112	97	60	54	80	1.21435	0.000106124	-1.15253	6.37947e-07	LINK	lin-14 encodes a novel protein whose activity is required for specifying the division timings of a specific group of cells during postembryonic development; lin-14 loss-of-function mutations result in the premature appearance of later larval lineages, while gain-of-function mutations result in reiteration of L1 larval stages lineages; in addition, lin-14 acts as a positive regulator of AVM, PVM, …
WBGene00003404	mpz-1	C52A11.4a	82	137	151	222	284	224	62	76	86	58	43	49	1.21381	0.000475178			LINK	mpz-1 encodes a multi-PDZ domain containing protein; mpz-1 is expressed in nerve ring, pharyngeal, body, and tail neurons, as well as body wall and vulval muscles; MPZ-1 colocalizes with SNB-1 in neuronal puncta; the PDZ domain 10 of MPZ-1 binds the C-terminal PDZ-binding motif (ETFL) of the serotonin (5-HT) receptor SER-1, MPZ-1 binding enhances SER-1 activity, and mpz-1 is coexpressed with ser-…
WBGene00018001	F33D11.2	F33D11.2	11	21	32	37	40	50	16	18	24	14	8	10	1.21274	0.0472575	-1.24173	0.026446	LINK	none available
WBGene00015855	C16C8.18	C16C8.18	40	104	109	186	161	154	51	53	52	26	22	24	1.21232	0.00834638	-1.49433	7.45544e-06	LINK	none available
WBGene00004134	pqn-47	F59B10.1	344	337	291	649	841	411	225	246	251	37	26	25	1.21017	0.000138266	-3.41771	8.89765e-57	LINK	pqn-47 encodes a protein with a glutamine/asparagine-rich domain, homologous to human C11orf9 and Drosophila CG3328, that is required for locomotion, vulval development, full body size, cuticular integrity, and general health in mass RNAi assays; pqn-47(cxP5915) homozygotes are sluggish.
WBGene00001477	fmo-2	K08C7.5	71	42	54	114	84	131	2311	2085	2662	1444	1132	1365	1.21007	0.00149017	-1.21688	2.0066e-92	LINK	fmo-2 encodes a flavin-containing monoxygenase homologous to human FMO1, FMO2, and FMO3 (OMIM:602079, mutated in trimethylaminuria).
WBGene00000111	alh-5	T08B1.3	152	204	170	338	375	316	81	59	71	112	67	101	1.2088	1.79418e-08			LINK	none available
WBGene00010989	R03D7.2	R03D7.2	181	206	182	370	394	350	231	217	240	135	127	134	1.2087	1.40127e-11	-1.17033	9.1023e-15	LINK	none available
WBGene00019426	cutl-16	K06A1.3	19	30	32	56	62	41	38	34	35	204	173	199	1.20607	0.0107158	2.05185	1.03383e-20	LINK	none available
WBGene00019997	R10F2.6	R10F2.6	51	149	122	209	214	207	108	101	114	52	55	65	1.20589	0.00652213	-1.28086	1.7214e-08	LINK	none available
WBGene00004958	spe-4	ZK524.1	41	130	139	190	207	213	76	52	72	78	61	68	1.20585	0.0196205			LINK	spe-4 encodes a transmembrane protein that is a divergent member of the presenilin family of proteins that have been implicated in early-onset Alzheimer's disease (OMIM:104300); spe-4 activity is required for proper formation and function of the fibrous body-membranous organelles that are asymmetrically localized to spermatids during spermatogeneis; spe-4 is also required for proper partitioning …
WBGene00006589	tnt-4	T08B1.2a	235	337	251	616	588	403	87	66	66	92	54	71	1.20544	4.03705e-06			LINK	none available
WBGene00020086	npr-24	R106.2	18	25	28	41	47	51	20	17	25	58	36	60	1.2045	0.00911493			LINK	none available
WBGene00006487	tag-141	C30H6.2	17	35	28	52	62	42	8	12	11	26	18	23	1.20392	0.01435			LINK	tag-141/C30H6.2 encodes a putative zinc transporter orthologous to human SLC39A4 (OMIM:607059, mutated in acrodermatitis enteropathica).
WBGene00011436	T04F3.1	T04F3.1a	522	909	864	1534	1668	1284	827	890	923	529	470	596	1.20136	2.90309e-05	-1.10505	5.48401e-36	LINK	none available
WBGene00009528	F38A6.4	F38A6.4	51	36	30	90	73	65	16	17	13	47	25	36	1.20073	0.00173433			LINK	none available
WBGene00044004	C24A8.6	C24A8.6	37	44	39	85	81	68	13	7	8	78	56	61	1.20071	0.000313984	2.42016	6.04131e-09	LINK	none available
WBGene00003614	nhr-15	F33E11.1	19	20	12	37	34	28	11	14	4	48	29	45	1.20068	0.0213472	1.66842	0.000788716	LINK	nhr-15 is predicted to encode a member of the nuclear hormone receptor family.
WBGene00001703	grd-14	T01B10.2	350	625	547	1143	1070	760	216	200	208	525	370	478	1.19975	8.13646e-05			LINK	grd-14 encodes a hedgehog-like protein, with an N-terminal signal sequence and a C-terminal Ground domain; the Ground domain is predicted to form a cysteine-crosslinked protein involved in intercellular signalling, and it has subtle similarity to the N-terminal Hedge domain of HEDGEHOG proteins; GRD-14 is required for normal growth to full size, locomotion, and vulval morphogenesis; all of these …
WBGene00022205	Y73B3A.3	Y73B3A.3	77	63	68	123	137	145	55	46	57	190	160	162	1.19949	1.59955e-05	1.32294	2.66737e-10	LINK	none available
WBGene00003929	pat-2	F54F2.1	312	578	597	1042	1006	863	249	192	250	984	670	898	1.19862	0.000151713	1.50218	1.01389e-44	LINK	pat-2 encodes an alpha integrin subunit; during embryogenesis, pat-2 is essential for body wall muscle assembly and function and hence, proper elongation and hatching.
WBGene00000784	cpr-4	F44C4.3	3302	3932	2995	6973	6682	6176	5566	5002	5642	3886	2924	3589	1.19713	4.02895e-20	-1.02069	4.36162e-136	LINK	cpr-4 encodes a cathepsin B-like cysteine protease expressed at all life stages.
WBGene00004237	ptr-23	ZK270.1	351	461	464	923	932	635	244	205	207	75	61	62	1.19689	2.79447e-06	-2.10621	2.42379e-31	LINK	ptr-23 encodes a nematode-specific member of the sterol sensing domain (SSD) proteins, distantly paralogous to Drosophila PATCHED (PTC) and human PTCH (OMIM:601309, mutated in basal cell nevus syndrome); PTR-23 is strongly required for normal molting from L4 to adult stages (a role conserved in C. briggsae); PTR_23 also functions in a pathway with the mucin-like protein OSM-8 to regulate the osmo…
WBGene00008997	lgc-31	F21A3.7a	22	27	28	53	55	42	9	8	13	32	29	21	1.19686	0.00497172	1.08712	0.0453306	LINK	none available
WBGene00009133	bed-3	F25H8.6	121	87	79	202	220	134	42	33	40	125	108	119	1.1942	0.000407641	1.24032	6.10856e-07	LINK	bed-3 encodes a protein that contains a BED-type zinc finger domain; loss of bed-3 activity in large-scale RNAi screens indicates that bed-3 is required for larval development.
WBGene00006830	unc-103	C30D11.1a	44	87	70	130	170	89	33	54	43	132	115	117	1.19394	0.00652213	1.10533	1.54822e-05	LINK	unc-103 encodes an ether-a-go-go-related (ERG) K+ channel homolog, orthologous to human KCNH6 (OMIM:608168); UNC-103 regulates muscle activation in motility, egg-laying and male spicule protraction; UNC-103 is expressed highly in many neurons; gain-of-function unc-103 alleles can be uncoordinated, while loss-of-function alleles have a more subtle defect in copulatory spicule protraction.
WBGene00013622	clec-238	Y102A5C.17	17	25	16	40	35	37	6	7	9	43	38	50	1.19183	0.0131598	2.19853	6.05592e-06	LINK	none available
WBGene00000020	abt-2	F12B6.1	65	122	164	219	264	203	108	74	93	24	28	28	1.19133	0.00565052	-2.14784	4.06472e-14	LINK	abt-2 encodes a predicted ATP-binding cassette (ABC) transporter that is a member of the ABCA subfamily of transport proteins; ABT-2 is predicted to function as a transmembrane protein that couples energy to transport of various molecules across membranes.
WBGene00235377			16	51	23	52	65	55	43	40	34	19	16	12	1.1909	0.0384047	-1.69401	3.22487e-05	LINK
WBGene00001159	eff-1	C26D10.5a	57	46	59	115	127	73	27	18	30	78	70	87	1.19053	0.00195444	1.27763	4.79286e-05	LINK	eff-1 encodes novel, nematode-specific type I transmembrane and secreted glycoproteins; during development, EFF-1 functions as a fusogen required, in both fusion partners, for the initiation and expansion of membrane mergers that characterize cell fusions; eff-1(hy21) mutants are viable, but have severe body morphology defects associated with cell fusion failure; eff-1::GFP reporter fusions are e…
WBGene00017507	F16B4.5	F16B4.5a	18	31	22	49	50	38	14	19	29	86	78	81	1.18964	0.0107153	1.61337	9.74741e-07	LINK	none available
WBGene00009515	clec-170	F38A1.1	123	236	242	369	408	386	109	82	98	405	305	392	1.18537	0.00046681	1.55114	3.97201e-25	LINK	none available
WBGene00015061	cpna-2	B0228.4a	570	770	751	1249	1499	1285	502	496	541	1994	1631	2015	1.18512	3.94623e-08	1.49523	4.16018e-104	LINK	cpna-2 encodes proteins with similarity to several InterPro domains including those of polycystin cation channels, von Willebrand factor, the DNA recombination repair protein BRCA2, protein-tyrosine phosphatase, non-receptor type-13, glyoxylate carboligase, and copines, Ca2+-dependent phosphatidylserine binding proteins; cpna-2::gfp reporter fusions are expressed in body wall muscle.
WBGene00021167	cyp-32B1	Y5H2B.5	24	68	48	99	88	82	68	60	71	44	45	33	1.18174	0.0123588	-1.07195	0.00021665	LINK	none available
WBGene00013683	zoo-1	Y105E8A.26a	156	151	127	268	356	207	129	128	136	57	55	55	1.18107	7.70397e-05	-1.6085	3.24642e-14	LINK	zoo-1 encodes a protein ortholog of the zonula occludens (ZO) subfamily of membrane-associated guanylate kinases (MAGUKs); zoo-1 is involved in the recruitment of actin to cell junctions in a hmr-1/cadherin dependant manner; genetic interaction studies indicate that zoo-1 acts together with hmp-1/alpha-catenin and hmp-2/beta-catenin for the proper organization of actin at epidermal junctions duri…
WBGene00012445	Y16B4A.2	Y16B4A.2	540	1759	1669	2732	2854	2082	1102	1090	1125	279	196	230	1.18088	0.0124202	-2.61637	9.82686e-182	LINK	none available
WBGene00004226	ptr-12	K07A3.2a	109	91	48	162	182	128	36	22	40	53	63	59	1.18081	0.0020802			LINK	ptr-12 encodes a nematode-specific member of the sterol sensing domain (SSD) proteins, distantly paralogous to Drosophila PATCHED (PTC) and human PTCH (OMIM:601309, mutated in basal cell nevus syndrome); PTR-12 is weakly required for normal molting from L4 to adult stages growth to full size; PTR-12 is also required for normal locomotion.
WBGene00002976	lev-9	T07H6.5	18	23	31	45	59	35	10	28	18	29	30	40	1.17947	0.0244707			LINK	lev-9 encodes a novel extracellular protein; lev-9 was identified in screens for mutants that are resistant to the anthelmintic levamisole; lev-9 mutations result in weak levamisole resistance with respect to locomotion, but strong resistance with respect to egg laying.
WBGene00022951	C30E1.9	C30E1.9a	477	508	375	833	902	863	685	664	721	3287	3083	3911	1.17903	4.35143e-13	1.93814	1.15979e-150	LINK	none available
WBGene00021343	cutl-23	Y37B11A.1	29	28	28	75	55	34	21	10	8	62	34	34	1.17747	0.0155408	1.34575	0.00469017	LINK	Y37B11A.1 is orthologous to the human gene COLLAGEN TYPE VI, ALPHA 3 CHAIN (COL6A3; OMIM:120250), which when mutated leads to disease.
WBGene00002113	ins-30	ZC334.2	23	20	15	44	45	22	7	5	8	11	8	8	1.1773	0.0398306			LINK	ins-30 encodes an insulin-like peptide.
WBGene00018744	F53B3.6	F53B3.6	142	215	178	357	420	247	51	39	69	31	23	20	1.17668	0.000178295	-1.47246	2.46567e-05	LINK	none available
WBGene00002212	kin-31	B0523.1	16	50	37	64	65	68	33	18	13	7	6	8	1.17641	0.026325	-1.98852	0.00104795	LINK	kin-31 encodes a predicted tyrosine protein kinase expressed in the nucleus and cytoplasm of body-wall muscle cells; the expression of kin-31 was experimentally verified by RT-PCR.
WBGene00012809	Y43F8A.2	Y43F8A.2	76	377	271	506	446	435	212	176	176	46	43	38	1.17595	0.0374666	-2.52572	1.86502e-33	LINK	none available
WBGene00003000	lin-11	ZC247.3	24	53	49	75	95	71	28	26	27	49	39	49	1.17322	0.010984			LINK	lin-11 encodes a predicted LIM homeodomain transcription factor that affects vulval development, neuronal development and fate specification, utse cell differentiation, and fertility; it is expressed in some neurons, the vulva, pi cells and their progeny, and the spermatheca.
WBGene00004008	pgp-14	F22E10.3	166	204	185	388	394	280	22	46	24	53	25	49	1.17276	1.00087e-06			LINK	pgp-14 encodes a member of the ABC transporter family with high similarity to the vertebrate MDR (multidrug resistance) family; PGP-14 is predicted to function as a transmembrane protein that couples energy to transport of various molecules across membranes, but as loss of pgp-14 activity via large-scale RNAi screens does not result in any obvious defects, the precise role of pgp-14 in C. elegans…
WBGene00044079	tag-241	C34E11.3a	104	133	130	229	257	216	64	101	61	436	384	481	1.17269	1.3728e-06	2.13991	3.93943e-34	LINK	none available
WBGene00001190	egl-23	Y37A1B.11a	27	38	43	66	68	73	19	20	32	31	22	25	1.17176	0.00263228			LINK	egl-23 encodes one of 44 C. elegans TWK (two-P domain K+) potassium channel subunits that contain two pore-forming domains and four transmembrane domains; egl-23 was originally defined by gain-of-function mutations that result in defects in locomotion, egg-laying, and enteric muscle activation; loss of egl-23 function via reversion or RNA-mediated interference (RNAi) does not result in any abnorm…
WBGene00022219	Y73B3A.18	Y73B3A.18a	49	150	108	227	209	150	60	52	57	75	38	43	1.17085	0.013647			LINK	none available
WBGene00009958	madd-4	F53B6.2a	117	106	97	178	275	155	49	67	52	415	305	331	1.17058	0.000547287	2.26035	4.06136e-36	LINK	none available
WBGene00002827	let-653	C29E6.1a	118	155	141	273	313	204	43	34	57	71	80	77	1.17019	3.21645e-05			LINK	let-653 encodes a mucin-like protein similar to the highly glycosylated mucins secreted by the apical surface of epithelia and believed to provide a protective barrier to exposed cellular surfaces; LET-653 is required for viability, locomotion, and for maintaining the tubular epithelial structure of the excretory cell canals.
WBGene00004145	pqn-62	T03G11.1	23	62	55	98	89	81	42	26	36	61	45	57	1.16997	0.0148673			LINK	The protein product of this gene is predicted to contain a glutamine/asparagine (Q/N)-rich ('prion') domain, by the algorithm of Michelitsch and Weissman (as of the WS77 release of WormBase, i.e., in wormpep77).
WBGene00012627	Y38H6C.15	Y38H6C.15	15	36	19	53	37	43	31	16	14	10	8	6	1.16967	0.0299236	-1.7213	0.00411637	LINK	none available
WBGene00004179	prg-2	C01G5.2	1796	2599	2323	4336	4509	3961	3057	2833	2940	4692	3876	4416	1.16801	3.15462e-09			LINK	prg-2 encodes a novel, basic protein that is one of two C. elegans members of the Piwi subfamily of highly conserved Argonaut/Piwi proteins.
WBGene00015818	C16A11.5	C16A11.5	266	261	236	474	474	504	304	242	298	1902	1491	1813	1.16773	1.0218e-13	2.2469	6.23388e-171	LINK	none available
WBGene00007041	tag-180	T24F1.6a	36	46	42	80	89	67	21	38	22	27	22	31	1.16669	0.00084489			LINK	tag-180 encodes an alpha2/delta subunit of a voltage-gated calcium channel; a tag-180::gfp promoter fusion is expressed in the gut and in a small number of head and tail neurons.
WBGene00016006	fln-2	C23F12.1a	500	701	601	1206	1360	860	607	604	602	60	53	67	1.1658	6.87955e-06	-3.7119	1.15287e-144	LINK	none available
WBGene00022795	ZK686.5	ZK686.5	17	37	31	57	31	74	21	4	17	30	22	29	1.16418	0.0481257			LINK	none available
WBGene00021415	nsy-4	Y38F2AL.1	72	100	72	164	181	117	65	64	48	22	28	23	1.164	0.000249291	-1.64882	9.72398e-07	LINK	nsy-4 encodes a member of the PMP22/EMP/claudin/calcium channel gamma subunit family; nsy-4 is worm-specific, with obvious homologs only in C. elegans; nsy-4 functions with nsy-5 to induce the AWC chemosensory neuron ON fate by regulating the activity of the UNC-2/UNC-36 calcium channel.
WBGene00011777	T14G10.8	T14G10.8	70	175	136	269	254	201	126	120	131	111	82	100	1.16345	0.00361113			LINK	none available
WBGene00008651	F10D11.5	F10D11.5	18	46	38	71	66	57	19	31	30	23	13	16	1.16329	0.0177743	-1.01347	0.0321415	LINK	none available
WBGene00019540	K08D12.6	K08D12.6	4890	19826	11703	27755	23606	17525	6203	5558	6294	300	290	280	1.16277	0.018925	-4.74986	0	LINK	none available
WBGene00011938	alh-13	T22H6.2a	521	654	585	1232	1353	756	248	258	303	252	164	217	1.16182	3.83209e-05			LINK	none available
WBGene00007372	C06B8.7	C06B8.7	74	96	90	197	167	131	70	72	88	14	3	18	1.16178	6.52924e-05	-3.11074	1.17181e-16	LINK	none available
WBGene00011414	T04A8.13	T04A8.13	20	77	41	93	71	96	32	33	35	40	25	22	1.16099	0.0418704			LINK	none available
WBGene00012012	T25B9.6	T25B9.6	35	125	112	174	170	173	58	69	61	53	53	70	1.15982	0.0272741			LINK	none available
WBGene00017028	dex-1	D1044.2a	87	88	71	162	204	98	56	63	57	16	15	19	1.15855	0.00222615	-2.19589	3.26575e-10	LINK	dex-1 encodes a single-pass transmembrane protein with a domain similar to zonaadhesion, a sperm protein that binds the ZP matrix, dex-1 is also predicted to include two domains similar to nidogens, a family of proteins found in especially neural basement membrane; dex-1 share a domain composition with &#945; and &#946; tectorin, two vertebrate inner ear protein found in matrix that anchors the s…
WBGene00010057	F54D5.15	F54D5.15a	35	35	28	85	59	42	11	18	11	21	15	10	1.1582	0.00973969			LINK	none available
WBGene00015359	C02G6.1	C02G6.1	26	18	25	51	42	38	3	8	8	75	50	81	1.15394	0.0130823	3.0488	4.65027e-11	LINK	none available
WBGene00022591	cuti-1	ZC328.1	218	66	66	244	226	187	85	65	81	139	136	173	1.15147	0.0408163			LINK	none available
WBGene00019994	cdh-1	R10F2.1	73	99	91	168	197	130	37	45	63	13	2	14	1.15041	0.000212436	-2.72122	2.76113e-09	LINK	cdh-1 encodes a cadherin that is similar, in the extracellular domain, to the Drosophila cadherin Dachsous (Ds); although the precise role of cdh-1 in C. elegans development and/or behavior is not yet known, loss of cdh-1 activity via RNAi using the hypersensitive rrf-3 strain can result in locomotion and growth defects, as well as larval lethality.
WBGene00044333	C01G12.13	C01G12.13	14	31	22	46	33	47	22	14	19	4	9	7	1.14985	0.0297684	-1.80896	0.00381737	LINK	none available
WBGene00002048	ida-1	B0244.2	234	321	294	580	612	405	191	189	207	129	105	120	1.14744	1.42038e-05	-1.10754	5.18402e-12	LINK	ida-1 encodes a protein tyrosine phosphatase-like receptor, orthologous to the mammalian type I diabetes autoantigens IA-2 and phogrin that are expressed in dense core vesicles of neuroendocrine tissue and involved in regulated protein secretion; in C. elegans, IDA-1 appears to be required for regulating presynaptic neurotransmission and in particular, for the neuropeptidergic control of egg-layi…
WBGene00020164	T02G5.4	T02G5.4	57	136	104	191	176	190	72	77	98	379	282	329	1.14637	0.00262239	1.62377	6.68068e-24	LINK	none available
WBGene00002247	lam-1	W03F8.5	796	1330	1327	2149	2365	1985	593	570	605	1219	1040	1189	1.14595	3.16303e-05			LINK	lam-1 encodes a laminin beta that affects degenerin-induced cell death and is required redundantly with lam-2 for morphogenesis.
WBGene00019321	K02E10.7	K02E10.7	17	35	38	64	55	51	29	28	20	106	76	95	1.14577	0.0198862	1.45983	9.77542e-07	LINK	none available
WBGene00018252	F40H3.6	F40H3.6	12	23	18	29	38	32	30	23	21	116	100	105	1.1445	0.0386292	1.74126	1.02559e-09	LINK	none available
WBGene00001006	dlg-1	C25F6.2a	373	416	329	788	851	452	334	315	339	103	75	111	1.14419	0.000125244	-2.15528	8.47374e-49	LINK	dlg-1 encodes a MAGUK protein, orthologous to Drosophila Discs large; DLG-1 is physically located at apical adherens junctions in all epithelia and is required for organization of the embryonic gut epithelium into a coherent tube.
WBGene00002123	inx-1	C16E9.4a	62	72	77	133	154	109	35	42	38	32	24	30	1.14342	0.000225334			LINK	inx-1 encodes a predicted member of the innexin family; expressed in 4-6 anterior neurons.
WBGene00013518	Y73F8A.5	Y73F8A.5	24	24	13	32	47	34	9	10	10	23	5	14	1.14234	0.0331581			LINK	none available
WBGene00023159	W06H8.5	W06H8.5	248	522	366	909	710	509	279	219	298	61	33	69	1.1423	0.00146042	-2.67101	1.02897e-44	LINK	none available
WBGene00013082	Y51A2D.15	Y51A2D.15a	77	107	95	182	207	133	52	71	31	33	22	26	1.14198	0.000270525	-1.3285	0.000471017	LINK	none available
WBGene00016354	rig-6	C33F10.5a	169	262	201	435	424	321	72	94	87	252	195	220	1.14048	1.08207e-05	1.01625	2.03074e-08	LINK	rig-6 encodes a protein with immunoglobulin and fibronectin type III domains and is similar to vertebrate contactins; based upon large-scale RNAi screens, rig-6 activity appears to be required for reproduction and positive regulation of body size; rig-6::gfp reporter fusion are expressed in neurons, particularly the URX ring interneurons.
WBGene00004216	ptr-1	C24B5.3	158	160	140	300	309	246	109	158	118	346	288	341	1.13975	3.69118e-08			LINK	ptr-1 encodes an ortholog of Drosophila and human PTCHD3, which defines one of seven paralogous families of sterol sensing domain (SSD) proteins; individually, PTR-1 is weakly required for normal molting from L4 to adult stages; however, PTR-1, in conjunction with either PTR-16 alone or with PTR-6 and PTR-10, is strongly required for both molting and viability, with double ptr-1/-16 or triple ptr…
WBGene00009685	F44D12.8	F44D12.8a	32	93	77	138	118	122	38	47	58	46	39	25	1.1385	0.0154902			LINK	none available
WBGene00001131	dys-1	F15D3.1a	275	434	350	633	810	525	228	248	218	186	171	221	1.13673	7.25933e-05			LINK	The dys-1 gene encodes an ortholog of human DMD, which when mutated leads to Duchenne muscular dystrophy (OMIM:310200).
WBGene00002163	ist-1	C54D1.3	29	41	25	66	69	41	21	24	20	23	23	32	1.13443	0.0124281			LINK	ist-1 encodes a pleckstrin homology (PH) and phosphotyrosine binding (PTB) domain-containing insulin receptor substrate (IRS) homolog that negatively regulates lifespan and dauer development; IST-1 potentiates insulin-like signaling, although it is not absolutely required for such signaling under most conditions; in addition to acting through the AGE-1/PI3K branch of the insulin-like signaling pa…
WBGene00001187	egl-19	C48A7.1a	98	168	149	241	313	217	80	96	100	151	121	163	1.13346	0.000578905			LINK	egl-19 encodes the pore-forming alpha1 subunit of a voltage-gated calcium channel orthologous to the alpha subunit of mammalian L-type calcium ion channels; EGL-19 carries L-type currents in pharyngeal and body wall muscle, and its activity is essential and required for muscle contraction during late embryonic morphogenesis, locomotion, egg laying, mating and feeding; recordings of voltage-depend…
WBGene00220259	ZK418.13	ZK418.13	15	42	32	56	53	56	28	33	28	13	20	19	1.12971	0.0304699	-1.14169	0.0109055	LINK	none available
WBGene00003578	ndx-1	T26E3.2	61	89	64	145	142	109	24	25	30	81	65	64	1.12915	0.000206753	1.03504	0.00123146	LINK	The ndx-1 gene encodes a NUDIX hydrolase.
WBGene00000088	aex-5	F32A7.6	200	416	348	602	539	648	198	184	234	925	787	823	1.12888	0.000463381	1.66802	1.0948e-57	LINK	an ortholog of calcium-dependent serine endoproteinases, the kex2/subtilisin-like proprotein convertase that affects defecation cycle and anterior body contractions; and is expressed in all muscle cells except pharyngeal muscles.
WBGene00013073	hmit-1.1	Y51A2D.4	130	349	297	510	495	434	618	585	648	452	347	374	1.12583	0.00556034	-1.0367	1.64015e-28	LINK	hmit-1.1 encodes one of three C. elegans proton (H+)-dependent myo-inositol transporters; loss of hmit-1.1 activity via large-scale RNAi result in no obvious abnormalities but by homology, HMIT-1.1 is predicted to function as a plasma membrane protein required for the regulated uptake of myo-inositol and thus potentially for regulation of cell signaling and intracellular osmolarity.
WBGene00007559	C14A4.8	C14A4.8	14	34	39	55	59	48	7	9	27	11	5	4	1.1255	0.0427221			LINK	none available
WBGene00015331	C02B10.6	C02B10.6	38	176	92	200	185	176	73	58	87	24	20	11	1.12417	0.0476607	-2.3537	3.27169e-12	LINK	none available
WBGene00004213	ptp-1	C48D5.2a	73	120	99	167	220	151	55	67	70	58	47	42	1.12393	0.000733641			LINK	ptp-1 encodes a non-receptor tyrosine phosphatase containing Band 4.1 and PDZ domains that may function in linking cytoplasmic proteins and signaling molecules to sites on the plasma membrane; by homology, PTP-1 is predicted to function in cell signaling.
WBGene00021998	Y59E9AR.2	Y59E9AR.2	23	44	29	53	58	65	18	20	24	10	27	32	1.12023	0.0104475			LINK	none available
WBGene00001172	egl-3	C51E3.7a	647	831	661	1462	1430	1045	386	418	410	252	183	226	1.11963	7.00944e-08	-1.26084	7.05423e-26	LINK	The egl-3 gene encodes a homolog of a mammalian proprotein convertase that participates in peptide secretion.
WBGene00013385	Y62E10A.19	Y62E10A.19	124	43	51	139	146	116	43	40	51	52	45	55	1.11959	0.0286722			LINK	none available
WBGene00004123	pqn-36	F39D8.1a	48	74	52	147	115	59	14	15	10	12	9	10	1.11946	0.0166326			LINK	The protein product of this gene is predicted to contain a glutamine/asparagine (Q/N)-rich ('prion') domain, by the algorithm of Michelitsch and Weissman (as of the WS77 release of WormBase, i.e., in wormpep77).
WBGene00018134	F37A4.4	F37A4.4	53	188	159	265	210	264	150	113	110	133	105	124	1.11822	0.0285588			LINK	none available
WBGene00007750	syg-2	C26G2.1	59	64	81	123	156	98	51	46	47	58	35	49	1.11785	0.0020039			LINK	syg-2 encodes a transmembrane protein that is a member of the immunoglobulin superfamily of proteins; during larval development, SYG-2 activity is required in vulval epithelial cells for proper synaptic specificity of the HSNL neuron; in regulating synapse formation, SYG-2 acts as a guidepost protein for the SYG-1 receptor that interacts with SYG-2 and acts within HSNL to regulate synaptic specif…
WBGene00014821	R10E8.7	R10E8.7	49	86	72	140	124	117	45	36	42	162	128	133	1.11642	0.000645928	1.4057	1.86475e-09	LINK	none available
WBGene00015230	tag-344	B0511.4	28	78	79	118	101	123	79	58	60	92	61	71	1.1155	0.0258221			LINK	none available
WBGene00020289	T06C10.3	T06C10.3	34	105	105	144	158	148	51	31	52	60	55	65	1.1147	0.0296688			LINK	none available
WBGene00004904	snf-5	Y46G5A.30	140	553	423	727	670	651	379	349	357	28	40	51	1.11296	0.0267143	-3.56221	5.75544e-81	LINK	none available
WBGene00004793	shw-3	R186.5	15	20	29	42	35	41	4	9	16	63	41	52	1.10731	0.0353056	2.04631	7.90879e-06	LINK	none available
WBGene00019017	F57F4.4	F57F4.4	3883	11365	9081	15657	17283	11493	7036	6841	7095	638	555	638	1.10685	0.00953312	-3.89598	0	LINK	none available
WBGene00012118	grsp-2	T28C6.1a	173	295	194	418	453	331	117	81	106	226	202	215	1.10622	0.000114279			LINK	none available
WBGene00016454	C35E7.2	C35E7.2a	18	20	25	36	48	31	14	10	6	62	50	47	1.10231	0.0336785	2.02658	3.77381e-06	LINK	none available
WBGene00018193	F39C12.1	F39C12.1	300	325	330	555	697	485	251	283	254	186	137	178	1.10073	2.15854e-06	-1.03911	1.11394e-12	LINK	none available
WBGene00004854	slt-1	F40E10.4	99	66	60	118	186	102	36	43	46	167	123	143	1.0984	0.00815165	1.41072	1.26299e-09	LINK	slt-1 encodes the sole C. elegans homolog of Drosophila Split, a secreted extracellular protein containing leucine-rich and EGF-like repeats that functions as a ligand for the Robo receptor; during C. elegans larval development, slt-1 acts via the SAX-3/Robo receptor, and in parallel with UNC-6/Netrin, to direct ventral axon guidance and guidance at the midline; during embryonic development, slt-…
WBGene00006788	unc-53	F45E10.1a	122	157	123	269	296	163	140	124	123	3	11	21	1.09754	0.000722853	-3.82904	2.45114e-09	LINK	unc-53 encodes at least five large (~1200-1600 residue) proteins, orthologous to human NAV1, NAV2/RAINB1 (OMIM:607026), and NAV3, and homologous to Drosophila CG10662; UNC-53 proteins are required for anteroposterior guidance of migrating cells and axons, and for egg laying, correct backward locomotion, full body size, and male mating; UNC-53 proteins vary in their N-terminal regions but share co…
WBGene00002040	hum-7	F56A6.2a	66	123	122	198	195	173	76	89	73	36	31	39	1.09619	0.00155161	-1.55026	2.23124e-08	LINK	hum-7 encodes a class IX unconventional myosin heavy chain that contains a myosin motor domain in the head region and zinc-finger and rhoGAP (rho GTPase activating protein) domains in the tail region; HUM-7 is required during embryogenesis for cytokinesis and normal cytoplasmic rearrangements, and by homology, may function in organization of the actin cytoskeleton; the precise expression and loca…
WBGene00017866	stn-2	F27D9.8a	48	57	54	95	102	91	52	46	37	118	74	110	1.09492	0.000271034			LINK	stn-2 encodes a gamma-syntrophin; loss-of-functions stn-2 mutations indicate that STN-2 activity is required for normal rates of locomotion and head movements; the STN-2 PDZ domain interacts with the SAX-7/L1CAM intracellular PB motif in vitro and genetic studies indicate that stn-2 and sax-7 interact to regulate neuronal and axon positioning; an STN-2::GFP reporter fusion is expressed in body wa…
WBGene00012924	Y47D3A.5	Y47D3A.5	12	22	19	32	30	34	7	13	9	18	12	11	1.0945	0.0431512			LINK	none available
WBGene00013352	lon-8	Y59A8B.20	571	245	215	742	541	581	151	116	118	193	147	177	1.09443	0.0108834			LINK	lon-8 encodes a secreted protein, conserved among nematodes, that inhibits body elongation during larval and early adult growth, probably by limiting cell size rather than nuclear ploidy or cell number; LON-8 is also required for normal ray morphology in the male tail, but not for superficially normal male mating, suggesting a role in cuticle retraction; LON-8 is strongly expressed in the hypoder…
WBGene00020230	nep-2	T05A8.4	169	349	260	479	500	426	119	142	132	66	36	50	1.09424	0.000508277	-1.76248	1.10107e-14	LINK	T05A8.4 encodes a neprilysin; neprilysins are thermolysin-like zinc metallopeptidases, found on the outer surface of animal cells, that negatively regulate small signalling peptides (e.g., enkephalin, tachykinin, insulin, and natriuretic peptides) by cleaving them; while T05A8.4 is an ortholog of mammalian neutral endopeptidase (NEP), expressed on the brush-border membranes of kidney; more genera…
WBGene00003072	lrp-2	T21E3.3	349	385	378	633	765	613	323	279	349	237	193	249	1.09324	2.04836e-08			LINK	lrp-2 encodes a protein related to gp330/megalin which is a member of the mammalian LDL receptor superfamily; lrp-1 is required for proper molting and thus growth of animals; given the molecular identity of lrp-1 and the observation that sterol starvation can phenocopy lrp-1 mutations, lrp-1 is likely involved in the endocytosis of sterols; lrp-1 could also be involved in the processing of protea…
WBGene00021287	Y24D9B.1	Y24D9B.1	40	90	88	136	119	141	51	47	74	37	30	25	1.09261	0.00936856	-1.27142	9.40355e-05	LINK	none available
WBGene00013289	tag-273	Y57G11A.1a	498	648	592	1092	1153	897	409	348	362	1380	1223	1326	1.09124	5.63869e-08	1.43777	2.73748e-65	LINK	none available
WBGene00219413	Y38F2AL.12	Y38F2AL.12	28	22	16	48	33	38	26	21	25	166	159	151	1.08926	0.0269046	2.35644	1.16597e-19	LINK	none available
WBGene00016735	fhod-1	C46H11.11	132	259	215	383	385	324	148	157	173	252	258	243	1.08708	0.000563455			LINK	none available
WBGene00003980	pes-7	F09C3.1	300	412	335	638	761	482	300	236	253	99	81	127	1.08689	3.73644e-05	-1.74183	8.71966e-26	LINK	pes-7 encodes an IQGAP ortholog; IQGAP proteins bind actin and CLIP-170, effect activities of the Rho family GTPases Rac1 and Cdc42, and function in cytokinesis; PES-7 is required for completing meiosis and mitosis, and for germline formation and maintenance; IQGAP's alpha-actinin domain is related distantly to alpha-actinin domains in calponin, transgelin (SM22 alpha), and the proto-oncogene Vav…
WBGene00001581	gfi-1	F57F4.3	2244	6239	5920	9431	10311	6321	4122	4184	4447	126	59	124	1.08678	0.015097	-5.76842	2.03859e-132	LINK	gfi-1 encodes a protein that contains 21 ET modules; interacts with unc-68 in yeast two-hybrid assays.
WBGene00003675	nhr-85	W05B5.3a	40	56	46	110	88	58	14	16	17	14	8	15	1.08425	0.0073422			LINK	nhr-85 encodes a nuclear receptor of the NR1 subfamily that is orthologous to the insect E75 nuclear receptors that regulate molting and metamorphosis, and human NR1D1, which is involved in mammalian circadian rhythms; by homology, NHR-85 likely functions as a transcription factor that,based upon RNAi experiments, is required for development of the egg-laying system and formation of SDS-resistant…
WBGene00008854	F15D3.4	F15D3.4	18	45	49	68	67	67	27	20	31	20	20	17	1.0801	0.0384188			LINK	none available
WBGene00007703	gbf-1	C24H11.7a	1656	1796	1453	3116	3453	2197	1751	1649	1864	181	174	153	1.07943	1.4197e-06	-3.74731	0	LINK	none available
WBGene00007600	C15C6.1	C15C6.1	136	95	71	196	197	145	88	58	70	167	116	126	1.07706	0.00151682			LINK	none available
WBGene00018350	ttm-4	F42C5.10	267	533	486	748	987	565	246	235	253	145	92	148	1.07642	0.00438403	-1.31748	2.22564e-17	LINK	none available
WBGene00000792	crb-1	F11C7.4	56	95	86	142	151	131	50	38	71	68	53	43	1.07611	0.000873663			LINK	crb-1 encodes a transmembrane protein with EGF-like and laminin repeats homologous to Drosophila CRUMBS; crb-1 appears to function redundantly with let-413 to effect epithelial polarization; CRB-1 localizes to cell junctions of non-cuticular epithelia, such as the intestine and the pharynx, near the apical plasma membrane.
WBGene00004221	ptr-6	C54A12.1	129	88	80	195	210	125	66	56	81	271	210	222	1.07573	0.0027021	1.41736	1.85697e-14	LINK	ptr-6 encodes an ortholog of Drosophila and human PTCHD3, which defines one of seven paralogous families of sterol sensing domain (SSD) proteins; PTR-6 is weakly required for normal molting from L4 to adult stages; however, PTR-6 in conjunction with PTR-1 and PTR-10 is strongly required for both molting and viability, with triple ptr-1/-6/-10 RNAi animals showing pronounced molting defects and le…
WBGene00004003	pgp-9	C47A10.1	169	558	473	778	856	514	387	312	384	76	53	64	1.07484	0.0307045	-2.86625	1.01132e-72	LINK	pgp-9 encodes an ATP-binding protein that is a member of the P-glycoprotein subclass of the ATP-binding cassette (ABC) transporter superfamily; PGP-9 is predicted to function as a transmembrane protein that couples energy to transport of various molecules across membranes, and loss of pgp-9 activity via RNAi can result in embryonic lethality; pgp-9 promoter-gfp fusion proteins are expressed in th…
WBGene00013969	tep-1	ZK337.1a	622	543	495	1061	1072	830	333	257	284	151	119	119	1.0745	1.13619e-08	-1.5444	6.16828e-25	LINK	none available
WBGene00016817	C50E3.6	C50E3.6	29	37	30	56	62	53	10	7	14	45	38	41	1.0739	0.00495762	1.63119	0.000381516	LINK	none available
WBGene00010558	ptp-4	K04D7.4a	24	18	18	37	44	26	16	6	12	26	22	25	1.07356	0.0435315			LINK	none available
WBGene00000611	col-34	F36A4.10	174	180	178	348	368	235	171	110	126	55	29	52	1.07341	5.2087e-05	-1.96904	5.04408e-16	LINK	col-34 encodes a cuticle collagen protein and is a critical component of male tail cuticle organization affecting ray morphology.
WBGene00002120	ins-37	F08G2.6	24	71	57	89	81	101	35	48	53	16	19	14	1.0719	0.0336585	-1.83982	2.58038e-06	LINK	ins-37 encodes an insulin-like peptide.
WBGene00009899	efl-3	F49E12.6	163	133	146	276	317	196	77	88	80	447	335	417	1.07155	0.000244772	1.90745	4.5573e-36	LINK	efl-3 encodes a protein with two E2F domains that may be involved in apoptosis.
WBGene00018098	F36F12.7	F36F12.7	14	33	26	43	36	51	13	19	16	5	1	6	1.07089	0.0476492	-2.40722	0.000953058	LINK	none available
WBGene00000989	dhs-26	ZK816.5	229	263	255	497	380	458	53	56	53	406	266	312	1.07058	2.95591e-08	2.21569	7.64714e-34	LINK	dhs-26 encodes a short-chain dehydrogenase predicted to be mitochondrial.
WBGene00011729	set-16	T12D8.1	693	699	624	1156	1440	984	794	788	882	171	130	202	1.07018	4.50126e-07	-2.67323	1.48358e-135	LINK	set-16 encodes an H3K methyltransferases of the SET1/mixed lineage leukaemia (MLL) family; SET-16 regulates levels of H3K4 trimethylation in vivo and the SET-16 SET domain has H3K4 monomethylase activity in vitro; set-16 is an essential gene and also plays a role in attenuating Ras-mediated signaling during vulval development, by regulating expression of ajm-1, which encodes a component of cellul…
WBGene00271636			27	23	14	36	46	31	22	28	30	23	11	16	1.06921	0.0435932	-1.07183	0.0223846	LINK
WBGene00004951	spc-1	K10B3.10a	1102	1382	1182	2289	2577	1646	1031	1032	1066	95	104	125	1.06846	5.01364e-06	-3.64772	6.55476e-226	LINK	spc-1 encodes the C. elegans alpha spectrin ortholog; during development, spc-1 activity is required for body morphogenesis, formation of body wall muscles, locomotion, and larval development.
WBGene00007699	C24H11.1	C24H11.1	41	124	53	152	111	121	83	30	42	65	7	70	1.06814	0.0335568			LINK	none available
WBGene00022048	fln-1	Y66H1B.2a	5596	6782	6107	11408	11858	9593	6597	6605	6941	858	704	815	1.06759	2.81015e-11	-3.46214	0	LINK	fln-1 encodes three protein isoforms, a full length filamin (fln-1a) orthologous to human filamin A, alpha (FLNA; OMIM:300017), of 2257 amino acids containing a well conserved N-terminal ABD and 20 Ig-like repeats and two trans-sliced versions with C- and N- terminal truncations are 1084 and 836 amino-acids respectively; expression of full-length filamin in hermaphrodites is required for normal b…
WBGene00019018	abts-3	F57F10.1a	93	136	132	206	222	214	55	65	77	200	156	139	1.06692	7.19596e-05			LINK	abts-3 encodes an anion transporter; abts-3 promoter gfp fusions are expressed in neurons and hypodermal cells in a pattern coincident with abts-1.
WBGene00009982	F53F1.4	F53F1.4	2567	2280	1759	4331	4503	2859	988	890	968	999	771	978	1.06676	2.19547e-05			LINK	none available
WBGene00015970	C18E3.1	C18E3.1	24	44	42	71	56	69	10	23	24	20	15	31	1.06582	0.0129361			LINK	none available
WBGene00020012	R11G1.6	R11G1.6a	146	190	165	312	331	246	68	61	82	163	165	147	1.06581	9.08517e-06			LINK	none available
WBGene00001429	fkb-4	ZC455.10	213	115	96	269	239	242	61	79	78	104	92	81	1.06557	0.00355973			LINK	fkb-4 encodes a peptidylprolyl cis/trans isomerase homologous to mammalian FK506 immunosuppressant-binding protein 9; FKB-4 expression is positively regulated by signaling through the DAF-2 insulin receptor-like pathway and in part, through the activity of the DAF-16 fork-head transcription factor suggesting that FKB-4 could play a role in metabolism and longevity; as loss of FKB-4 function via R…
WBGene00006668	twk-13	R04F11.4a	49	59	45	94	89	88	23	11	19	99	74	91	1.06548	0.000378756	1.94051	3.99e-09	LINK	twk-13 encodes one of 44 C. elegans TWK (two-P domain K+) potassium channel subunits that contain two pore-forming domains and four transmembrane domains; as loss of TWK-13 function via RNA-mediated interference (RNAi) does not result in any abnormalities, the precise role of TWK-13 in C. elegans development and/or behavior is not yet known; however, TWK-13 likely functions redundantly with other…
WBGene00013429	Y66D12A.3	Y66D12A.3	30	98	53	114	101	104	62	42	54	45	26	29	1.0654	0.0343612	-1.04283	0.00159304	LINK	none available
WBGene00007081	AH6.3	AH6.3	31	79	63	105	89	113	39	29	40	21	15	27	1.06469	0.0184397	-1.15741	0.00382249	LINK	none available
WBGene00001080	dpy-21	Y59A8B.1a	501	446	474	843	1002	676	691	583	568	121	105	118	1.06365	3.43053e-06	-2.79909	2.87774e-105	LINK	dpy-21 encodes a novel, conserved protein with a proline-rich N terminus; dpy-21 affects RNA levels of X-linked dosage-compensated genes, body length in hermaphrodites, and fertility and male tail development in males; DPY-21 interacts in vivo with DPY-27 and SDC-3, members of the dosage compensation complex, and like members of the dosage compensation complex, is diffusely localized in nuclei of…
WBGene00004047	plx-1	Y55F3AL.1	680	569	443	1005	1166	812	697	682	689	141	94	141	1.06339	1.46216e-05	-2.84363	4.09786e-129	LINK	plx-1 encodes a C. elegans plexin ortholog; by homology, PLX-1 is predicted to function as a semaphorin receptor whose activity is required for proper positioning of the ray 1 cells in the male tail; genetic analyses indicate that while plx-1 functions in the same genetic pathway as the smp-1 and smp-2 semaphorin-encoding genes to position ray 1 cells, it functions in parallel to unc-73/GEF and t…
WBGene00017447	F14B8.5	F14B8.5a	125	207	183	338	335	241	105	108	116	110	117	116	1.06292	0.000477677			LINK	none available
WBGene00021779	Y51H7C.1	Y51H7C.1	612	913	682	1577	1435	896	1119	1079	1173	303	246	271	1.06286	0.000239004	-2.41744	3.00105e-180	LINK	none available
WBGene00008731	F13B12.3	F13B12.3	36	43	49	84	61	83	13	13	15	110	84	97	1.0625	0.00417709	2.44806	2.53721e-13	LINK	none available
WBGene00010524	K03B8.6	K03B8.6	176	263	234	444	446	302	146	138	129	269	202	246	1.06023	0.000201744			LINK	none available
WBGene00013227	Y56A3A.6	Y56A3A.6	124	250	207	343	430	252	154	131	166	46	29	29	1.05906	0.00542277	-2.49548	4.70032e-27	LINK	none available
WBGene00013979	ZK507.3	ZK507.3	23	52	63	88	77	81	44	42	29	31	24	29	1.05824	0.0352029			LINK	none available
WBGene00011629	T08G11.1	T08G11.1a	3204	3281	3172	5644	6297	5111	3536	3824	3736	2389	2040	2356	1.05821	1.63268e-12	-1.08895	1.51562e-81	LINK	none available
WBGene00006784	unc-49	T21C12.1a	110	142	141	236	257	202	61	61	52	163	107	147	1.05811	3.57718e-05			LINK	unc-49 encodes multiple subunits of a heteromeric GABA receptor; unc-49 activity is required for postsynaptic GABA responsiveness and thus for normal regulation of locomotion; UNC-49::GFP reporter fusions for at least two isoforms are expressed in dorsal and ventral head and body wall muscles, with isoform-specific expression also seen in the sphincter muscle; UNC-49::GFP subcellular localization…
WBGene00008634	F10A3.4	F10A3.4	51	149	145	224	197	191	67	75	75	28	21	26	1.0557	0.027659	-1.91498	1.60704e-10	LINK	none available
WBGene00012124	T28D6.4	T28D6.4	50	75	54	89	142	82	38	33	56	20	18	15	1.05492	0.00981797	-1.62566	3.61234e-05	LINK	none available
WBGene00004457	rpm-1	C01B7.6	148	123	112	207	271	194	130	116	121	135	145	158	1.05411	0.000134638			LINK	rpm-1 encodes an E3 ubiquitin ligase that contains an N-terminal RCC1 (regulator of chromosome condensation)-like guanine nucleotide exchange factor (GEF) domain and that is orthologous to Drosophila highwire and murine Phr1; RPM-1 functions autonomously within several different types of neurons to regulate presynaptic differentiation; in regulating axon termination, RPM-1 acts through the GLO-4 …
WBGene00006584	tni-1	F42E11.4	938	677	590	1335	1494	1039	548	473	540	1033	813	994	1.05347	5.74008e-05			LINK	tni-1 encodes a member of the troponin family that affects body morphology, locomotion, egg laying, and epithelial morphogenesis in a large-scale RNAi analysis.
WBGene00004349	rgs-6	C41G11.3	48	60	33	88	92	66	35	46	57	34	30	31	1.05097	0.00577335			LINK	rgs-6 encodes a regulator of G protein signaling; by homology, RGS-6 is predicted to function as a GTPase-activating protein that binds G protein alpha subunits and negatively regulates heterotrimeric G protein signaling; loss of rgs-6 activity via RNAi or a deletion mutation results in no obvious defects, and likewise, rgs-6 overexpression has no measurable effect on egg-laying behavior, locomot…
WBGene00021981	lgc-26	Y58G8A.1	69	54	64	126	107	97	26	26	30	102	82	72	1.05085	0.000546199	1.26794	2.72478e-05	LINK	lgc-26 encodes a ligand-gated ion channel with similarity to the nicotinic acetylcholine receptors; lgc-26 activity is required for endocytosis by coelomocytes; an LGC-26::GFP fusion protein is expressed in coelomocytes and localizes to the cytoplasm.
WBGene00010396	H13N06.2	H13N06.2	39	37	32	61	81	47	29	29	20	27	19	32	1.04994	0.0133068			LINK	none available
WBGene00014208	ZK1067.2	ZK1067.2a	853	934	979	1539	1843	1477	1187	1100	1277	516	483	537	1.04908	4.42474e-08	-1.58728	3.44747e-96	LINK	none available
WBGene00007916	C34C6.3	C34C6.3	71	59	41	112	100	87	32	39	37	114	109	107	1.04879	0.00188104	1.23854	2.19538e-06	LINK	none available
WBGene00008401	D2005.6	D2005.6	35	33	21	53	60	42	21	18	21	64	48	60	1.04675	0.0182299	1.13936	0.00140232	LINK	none available
WBGene00007327	C05C9.3	C05C9.3	26	40	37	50	68	62	16	34	29	20	27	19	1.04614	0.0137508			LINK	The protein product of this gene is predicted to contain a glutamine/asparagine (Q/N)-rich ('prion') domain, by the algorithm of Michelitsch and Weissman (as of the WS77 release of WormBase, i.e., in wormpep77).
WBGene00015824	C16B8.4	C16B8.4	23	41	40	58	78	46	12	12	16	35	21	23	1.04454	0.0332115			LINK	none available
WBGene00008383	D1081.5	D1081.5	30	98	66	116	111	111	43	54	41	38	33	33	1.04352	0.0366716			LINK	none available
WBGene00017947	mth-2	F31D5.4	28	68	55	98	107	59	46	22	40	23	21	24	1.04334	0.0414846	-1.03266	0.0118433	LINK	none available
WBGene00022211	Y73B3A.9	Y73B3A.9	127	135	172	261	227	275	136	122	162	267	251	253	1.0421	7.57467e-05			LINK	none available
WBGene00044219	F28F8.10	F28F8.10	16	19	16	31	29	29	10	14	16	30	23	25	1.04201	0.0430422			LINK	none available
WBGene00001537	gcy-11	C30G4.3	41	55	27	65	92	55	20	20	23	53	26	34	1.04068	0.0241662			LINK	none available
WBGene00017482	set-9	F15E6.1	1134	1050	827	1654	2162	1401	1584	1488	1643	157	152	137	1.03959	2.09413e-05	-3.77689	0	LINK	set-9 encodes a large (1,655-residue) protein with a low-complexity N-terminal region, followed by a PHD-zinc finger and a SET domain; SET-9 has no non-nematode orthologs, but has 96% identity (1616/1679 residues) to its paralog SET-26; SET-9 is required for a normally short lifespan and low spontaneous mutation rate; life extension by set-9(RNAi) requires DAF-16, indicating that SET-9 limits nor…
WBGene00009511	F37H8.2	F37H8.2	28	30	37	53	72	41	15	28	22	119	88	114	1.03921	0.0274522	1.91661	2.01032e-10	LINK	none available
WBGene00003883	osm-1	T27B1.1	37	99	81	136	131	111	64	59	53	176	118	147	1.03689	0.0223689			LINK	osm-1 encodes a WD- and WAA-repeat containing protein that is the C. elegans ortholog of intraflagellar transport (IFT) complex B component IFT172; OSM-1 is a presumptive cargo molecule for kinesin-II, and OSM-1 is required, along with OSM-6, for the proper assembly of the middle segments of sensory cilia; osm-1 may act in a pathway with avr-14 to affect resistance to ivermectin-induced cessation…
WBGene00009190	F27D4.6	F27D4.6a	63	152	118	178	218	181	105	99	112	416	359	440	1.0354	0.0104191	1.56685	1.12286e-28	LINK	none available
WBGene00020854	T27C4.1	T27C4.1	161	215	154	363	333	223	147	117	150	111	71	91	1.03447	0.000281029			LINK	none available
WBGene00004166	pqn-85	Y43H11AL.3	1712	1457	1458	2668	3144	2219	2172	2121	2439	644	490	621	1.03414	5.84131e-07	-2.31885	1.15066e-287	LINK	pqn-85 encodes an ortholog of budding yeast Scc2p, Drosophila NIPPED-B, and human NIPBL (OMIM:608667, mutated in Cornelia de Lange syndrome) that is required for resistance to double-stranded DNA breakage; PQN-85 is also required, with MAU-2 and SCC-3, for normal chromosome segregation and embryonic viability; pqn-85(RNAi) induces hypersensitivity to double-stranded breaks in DNA (manifested by a…
WBGene00013543	Y75B8A.6	Y75B8A.6	79	95	102	179	179	123	50	63	57	54	35	52	1.03323	0.000823008			LINK	The protein product of this gene is predicted to contain a glutamine/asparagine (Q/N)-rich ('prion') domain, by the algorithm of Michelitsch and Weissman (as of the WS77 release of WormBase, i.e., in wormpep77).
WBGene00011736	T12D8.9	T12D8.9a	403	747	679	1053	1142	980	228	191	234	101	72	95	1.03184	0.000457442	-1.66412	1.62465e-23	LINK	none available
WBGene00010070	nep-17	F54F11.2a	2486	5395	4281	7662	8261	5130	2412	2328	2435	293	209	245	1.0301	0.00386109	-3.64481	0	LINK	F54F11.2 encodes a neprilysin; neprilysins are thermolysin-like zinc metallopeptidases, found on the outer surface of animal cells, that negatively regulate small signalling peptides (e.g., enkephalin, tachykinin, insulin, and natriuretic peptides) by cleaving them; F54F11.2 has no clear orthologs in other organisms.
WBGene00000518	ckk-1	C05H8.1a	36	33	21	58	52	45	28	22	31	135	90	105	1.02772	0.0161149	1.64523	3.72869e-09	LINK	ckk-1 encodes a serine/threonine protein kinase that is the C. elegans calcium and calmodulin-dependent protein kinase kinase (CaM-KK) ortholog; ckk-1 activity is required for CRE-dependent transcription in neurons; when expressed in vitro, CKK-1 is capable of stimulating the kinase activity of a downstream kinase, either C. elegans CMK-1 or recombinant mouse CaM-KIV, in a Ca2+/calmodulin-depende…
WBGene00012552	Y37D8A.12	Y37D8A.12a	160	188	147	318	268	268	142	129	151	103	100	98	1.02566	1.50966e-07			LINK	none available
WBGene00016120	C25H3.11	C25H3.11	919	833	823	1489	1656	1300	1223	1143	1253	1663	1427	1660	1.02557	3.00732e-09			LINK	none available
WBGene00007050	tag-184	F18C5.3	1022	1497	1386	2182	2406	2150	1740	1537	1602	3842	3338	4107	1.02426	2.17344e-06			LINK	none available
WBGene00013585	cyp-42A1	Y80D3A.5	74	89	104	171	169	123	40	40	32	151	128	116	1.02375	0.00119083	1.44126	9.96015e-09	LINK	none available
WBGene00013304	Y57G11C.6	Y57G11C.6	29	73	86	118	113	96	48	60	53	48	22	39	1.02288	0.0462518			LINK	none available
WBGene00007044	cpna-5	B0495.10a	77	80	73	133	143	120	30	34	43	152	128	182	1.02283	8.03545e-05	1.73242	8.64314e-13	LINK	none available
WBGene00019095	F59A7.8	F59A7.8	240	269	221	382	424	447	332	320	326	474	384	459	1.02224	3.88036e-08			LINK	none available
WBGene00008549	din-1	F07A11.6a	520	661	505	1013	1203	675	488	426	472	61	52	74	1.02141	0.000282421	-3.26773	5.34774e-104	LINK	none available
WBGene00022569	ZC239.6	ZC239.6	127	61	71	183	137	127	47	42	58	96	67	81	1.01967	0.011979			LINK	none available
WBGene00001081	dpy-22	F47A4.2	469	390	375	708	875	534	411	413	377	100	92	97	1.01897	0.000121075	-2.43378	4.33598e-64	LINK	dpy-22 encodes a broadly expressed protein, homologous to the human transcriptional mediator protein TRAP230, which is involved in WNT and RAS signaling, as well as in dosage compensation; DPY-22 has a C-terminal glutamine-rich domain that is dispensable for inhibition of RAS-dependent cell differentiation, but is required for inhibition of BAR-1-dependent gene expression.
WBGene00016330	C32E12.4	C32E12.4	104	180	137	254	249	219	67	72	71	177	116	150	1.01846	0.000314336			LINK	none available
WBGene00017218	dct-5	F07F6.5	25	56	43	75	56	82	12	13	13	24	17	32	1.01805	0.0286858			LINK	none available
WBGene00003174	mec-10	F16F9.5	17	20	25	39	39	29	10	9	14	50	29	41	1.01734	0.0482733	1.47633	0.00140232	LINK	The mec-10 gene encodes an amiloride-sensitive Na+ channel protein (degenerin) required to sense gentle mechanical stimuli (e.g. touch) along the body wall; it is paralogous to mec-4, which has similar function in vivo.
WBGene00003905	pad-1	Y18D10A.13	1101	919	839	1710	1891	1298	1255	1233	1268	157	142	173	1.01709	4.95344e-06	-3.37065	2.20591e-266	LINK	The pad-1 gene encodes a highly conserved, but unfamiliar, protein that is required for embryonic development.
WBGene00022335	Y82E9BR.2	Y82E9BR.2	203	239	236	387	385	392	195	182	239	675	476	588	1.01571	4.60822e-08	1.11666	9.72012e-22	LINK	none available
WBGene00021915	Y55D5A.1	Y55D5A.1a	38	47	34	63	72	68	19	18	23	38	28	24	1.01473	0.00417508			LINK	none available
WBGene00002266	lec-3	ZK892.1a	550	901	750	1416	1327	1030	338	342	331	160	119	162	1.0139	9.10147e-05	-1.58055	1.39584e-31	LINK	none available
WBGene00010062	lipl-1	F54F3.3	105	386	333	499	435	481	441	354	429	745	586	656	1.01267	0.0462112			LINK	none available
WBGene00001118	dyf-2	ZK520.3a	29	33	36	57	62	49	14	19	17	35	29	25	1.01237	0.010984			LINK	dyf-2 encodes an ortholog of human WDR19; DYF-2 associates with intraflagellar transport (IFT) particle complex B in sensory cilia, and is required for normal assembly and motion of IFT structures, including complex A particles; consequently, DYF-2 is also required for normal cilial structure and chemosensation; dyf-2 expression is regulated by DAF-19; dyf-2 mutants are longer-lived than normal; …
WBGene00013106	set-26	Y51H4A.12	665	672	490	970	1326	804	789	799	830	116	89	106	1.01159	0.000186481	-3.33909	2.9754e-180	LINK	set-26 encodes a large (1,677-residue) protein with a low-complexity N-terminal region, followed by a PHD-zinc finger and a SET domain; SET-26 has no non-nematode orthologs, but has 96% identity (1616/1679 residues) to its paralog SET-9; unlike its paralog SET-9, SET-26 has no obvious function in RNAi assays.
WBGene00016085	C25A8.5	C25A8.5	30	74	89	112	101	120	49	29	46	12	6	9	1.0114	0.0476202	-2.57859	1.50205e-08	LINK	none available
WBGene00008964	mltn-9	F19H8.4	257	129	101	339	296	195	66	67	79	39	26	19	1.01129	0.0253677	-1.71457	3.12554e-08	LINK	none available
WBGene00012272	dhc-4	W05B2.4	25	44	36	77	55	48	29	29	39	15	22	31	1.01047	0.0245319			LINK	none available
WBGene00003171	mec-7	ZK154.3	246	248	229	479	438	320	147	119	144	100	69	91	1.01005	8.92283e-06	-1.03785	9.19311e-08	LINK	mec-7 encodes a beta-tubulin required for touch sensitivity along the body wall, and for normal levels of locomotor activity; it is strongly expressed in six touch receptor neurons, with weak expression in FLP, PVD, and BDU cells.
WBGene00000781	cpr-1	C52E4.1	12151	12972	9857	21949	19625	18019	16468	15220	16599	4918	3571	4350	1.00995	2.46144e-13	-2.29347	0	LINK	cpr-1 encodes a cysteine protease of the cathepsin B-like cysteine protease family; cpr-1 appears to be required for embryogenesis; cpr-1 is specifically expressed in the gut of all stages except the embryo and around developing embryos in the gonad; expression of cpr-1 is regulated by three promoter GATA motifs.
WBGene00004736	sca-1	K11D9.2a	8068	10558	8893	16818	17735	12401	7067	6899	7625	642	546	667	1.00975	1.78519e-06	-3.91861	0	LINK	The sca-1 gene encodes a sarco-endoplasmic reticulum Ca[2+] ATPase homolog that is required for development and muscle function; sca-1 is also a ortholog of human ATP2A1 (OMIM:108730), which when mutated leads to Darier-White disease (OMIM:124200).
WBGene00004773	sem-4	F15C11.1	97	116	126	193	232	155	66	83	60	13	17	18	1.00927	0.000843709	-2.50086	7.93252e-13	LINK	sem-4 encodes a zinc-finger protein; sem-4 activity is required for proper development of cells in neuronal, mesodermal, and vulval cell lineages; SEM-4::GFP reporter fusions are widely expressed with fluorescence seen in a number of different cell types including neurons, hypodermis, vulval precursor cells, and tail blast cells such as B and F.
WBGene00013540	Y75B8A.3	Y75B8A.3	65	82	130	164	150	164	103	102	86	132	118	161	1.00695	0.00969678			LINK	none available
WBGene00007840	C31C9.6	C31C9.6	39	103	77	142	127	104	47	64	46	66	72	59	1.00575	0.0258268			LINK	none available
WBGene00013580	Y79H2A.3	Y79H2A.3a	819	735	692	1292	1514	1012	864	909	926	238	190	232	1.00517	5.48501e-06	-2.41245	1.08443e-137	LINK	The protein product of this gene is predicted to contain a glutamine/asparagine (Q/N)-rich ('prion') domain, by the algorithm of Michelitsch and Weissman (as of the WS77 release of WormBase, i.e., in wormpep77).
WBGene00007053	chd-7	T04D1.4	572	441	375	712	995	641	560	607	605	159	176	182	1.00509	0.000433518	-2.14973	2.46037e-70	LINK	none available
WBGene00017868	F27E11.2	F27E11.2a	24	20	28	40	44	39	22	18	21	77	49	81	1.00444	0.0313982	1.375	6.09915e-05	LINK	none available
WBGene00012121	T28C6.7	T28C6.7a	986	1196	1164	1942	2093	1661	762	731	836	1644	1359	1582	1.00335	7.63152e-08			LINK	none available
WBGene00003388	moe-3	F32A11.6	148	180	216	314	349	266	58	88	59	51	59	47	1.00231	0.000345786			LINK	moe-3 encodes a CCCH tandem zinc finger (TZF) protein; while loss of moe-3 activity via RNAi alone results in no obvious abnormalities, animals triply mutant for moe-3, oma-1, and oma-2 demonstrate oocyte maturation defects, indicating that these genes likely function redundantly during germline development; in situ hybridization experiments indicate that moe-3 mRNA expression is relatively weak …
WBGene00004855	sma-1	R31.1a	910	1038	964	1659	2044	1232	1002	986	985	524	411	514	1.00012	6.17325e-05	-1.4182	1.07116e-69	LINK	sma-1 encodes a beta-H spectrin; during embryonic morphogenesis, SMA-1 activity is required for a normal rate of elongation and thus, for a wild-type body length upon hatching; in addition, SMA-1 is required for proper morphogenesis of the pharynx and the excretory cell; sma-1 mRNA transcripts are first detected in hypodermal cells at the beginning of embryonic morphogenesis with later expression…
WBGene00194717	ZC239.22	ZC239.22	37	39	35	79	45	65	177	162	174	272	228	240	1.00004	0.0135983			LINK	none available
WBGene00009373	F34D10.3	F34D10.3	118	98	95	45	31	56	64	61	60	85	92	84	-1.00019	0.00743896			LINK	none available
WBGene00010277	F58G6.7	F58G6.7	1170	1013	980	495	397	451	440	453	464	763	586	788	-1.00081	8.52632e-10			LINK	none available
WBGene00020834	T27A1.2	T27A1.2	71	98	79	33	20	52	35	39	36	110	96	112	-1.00089	0.0434011	1.1534	9.06659e-06	LINK	none available
WBGene00018636	F49E8.2	F49E8.2a	6847	4738	4463	2308	1853	2634	3416	3280	3428	2571	1971	2291	-1.00108	6.20323e-05			LINK	none available
WBGene00014220	ZK1098.3	ZK1098.3	751	453	438	235	188	272	422	368	405	1243	915	1142	-1.00119	0.00157288	1.08393	1.45128e-38	LINK	none available
WBGene00015947	C18A11.1	C18A11.1	142	306	279	106	75	128	119	86	107	139	139	196	-1.00229	0.0202937			LINK	none available
WBGene00020373	gpx-6	T09A12.2a	130	118	120	49	33	74	47	56	57	108	108	109	-1.00293	0.0141801			LINK	none available
WBGene00009551	F38H4.10	F38H4.10	2105	1376	1257	697	600	704	1384	1413	1514	437	339	432	-1.00355	8.19269e-05	-2.21584	5.3356e-187	LINK	none available
WBGene00006448	glod-4	C16C10.10	3243	2285	2141	1100	860	1281	1616	1397	1600	1687	1415	1581	-1.00397	9.62444e-05			LINK	glod-4 encodes a glyoxalase required for normal lifespan, orthologous to human GLOD4; GLOD-4 is expressed in the larval and adult pharynx, pharyngeal-intestinal valve, intestine, anal sphincter, seam cells, amphids, and neurons, and in the adult reproductive system; overexpression of GLOD-4 increases glyoxalase activity 200-fold, reduces oxidative stress markers, and extends lifespan, probably by…
WBGene00008357	nspc-16	D1025.6	101	96	103	37	33	57	149	148	151	101	86	113	-1.00453	0.00849099			LINK	none available
WBGene00017450	bath-27	F14D2.1	1843	1261	1176	618	456	733	1241	1271	1379	1514	1335	1625	-1.0055	0.000433675			LINK	none available
WBGene00017282	F09E5.2	F09E5.2	3388	2711	2490	1198	942	1485	1893	1751	2138	3523	2868	3219	-1.00573	3.29404e-05			LINK	none available
WBGene00017767	F25B4.4	F25B4.4	1432	965	935	487	402	518	603	565	623	640	506	691	-1.00574	5.83694e-05			LINK	none available
WBGene00009468	F36D1.9	F36D1.9	148	114	112	53	38	67	51	38	36	42	26	25	-1.00645	0.0055333			LINK	none available
WBGene00050914	T12B5.15	T12B5.15	944	1133	1048	463	286	574	806	595	729	359	530	667	-1.00656	0.000846786			LINK	none available
WBGene00018646	F49F1.6	F49F1.6	44	86	69	29	24	31	13	14	10	16	12	15	-1.00656	0.0341364			LINK	F49F1.6 encodes a protein containing a signal sequence and several ShK toxin domains; expression and phenotypic analyses suggest that F49F1.6 plays a role in response to stressors such as ionizing radiation, heavy metals, and bacterial infection.
WBGene00010616	K07A1.10	K07A1.10	3295	2748	2617	1248	891	1518	1869	1661	1954	2790	2667	2967	-1.00743	6.36002e-05			LINK	none available
WBGene00021153	Y4C6A.3	Y4C6A.3	2974	1902	1754	943	796	1052	2095	1975	2154	1125	802	994	-1.00787	0.000199159	-1.47354	1.23566e-132	LINK	none available
WBGene00003081	lsm-7	ZK593.7	3875	2887	2531	1316	1029	1567	2654	2301	2799	2687	2867	3719	-1.00799	7.44851e-05			LINK	none available
WBGene00002256	lbp-4	ZK742.5	3580	2517	2541	1227	833	1587	2500	2159	2603	3824	3042	3758	-1.00808	0.00107514			LINK	lpb-4 encodes a homolog of the novel fatty acid binding protein, As-p18, found in the parasitic nematode Ascaris suum; As-p18 is a member of a family of small intracellular fatty acid binding proteins (iFABPs); unlike most lpb family members lpb-4 lacks a secretory signal
WBGene00008769	mrpl-13	F13G3.11	3029	2793	2661	1126	825	1627	1949	1877	2095	2872	2702	3251	-1.00828	0.00052285			LINK	none available
WBGene00014090	ZK822.2	ZK822.2	1512	1275	1212	511	398	773	965	848	1019	1211	1327	1637	-1.01068	0.000852151			LINK	none available
WBGene00007422	ugt-17	C08B6.1a	971	555	556	231	252	389	110	103	96	388	235	313	-1.01134	0.00606065	1.20774	2.71715e-13	LINK	none available
WBGene00008152	C47E12.9	C47E12.9	38	37	39	16	18	14	18	20	19	28	26	31	-1.01219	0.0470667			LINK	none available
WBGene00017357	F10E9.5	F10E9.5	1819	1444	1298	632	461	819	1002	812	923	1999	1696	1910	-1.01524	0.000289813			LINK	none available
WBGene00011641	T09A5.15	T09A5.15	608	480	418	179	196	254	360	231	266	227	214	251	-1.01527	0.00012203			LINK	none available
WBGene00017356	F10E9.4	F10E9.4	3622	3131	2852	1401	931	1700	2214	2015	2292	4870	3821	4643	-1.0157	0.000150848			LINK	none available
WBGene00003064	lpd-8	R10H10.1	4359	3667	3344	1612	1173	1982	3123	2701	3315	6147	4639	6149	-1.01632	4.68563e-05			LINK	lpd-8 encodes a homolog of human and mouse HIRA-interacting protein-5; LPD-8 has C-terminal similarity to a domain of NifU observed in thioredoxin-like proteins and domains (COG0694), and is predicted to be mitochondrial on phylogenetic grounds.
WBGene00012565	fbxa-210	Y37H2A.5a	3055	2405	2292	1064	913	1269	2190	2101	2523	2503	1986	2388	-1.01741	1.81713e-06			LINK	This gene encodes a protein containing an F-box, a motif predicted to mediate protein-protein interactions either with homologs of yeast Skp-1p or with other proteins; this gene's encoded protein also contains an FTH/DUF38 motif, which may also mediate protein-protein interaction.
WBGene00014163	rnh-1.2	ZK938.7	2338	1824	1845	831	608	1081	1842	1869	2154	3214	2631	3031	-1.01744	0.000219882			LINK	none available
WBGene00001842	her-1	ZK287.8a	105	54	65	31	23	40	55	69	66	124	126	117	-1.01765	0.0437586			LINK	her-1 generates two transcripts, the larger of which encodes a small, secreted, cysteine-rich protein (HER-1A) required for normal sex determination in wild-type XO male animals, while being dispensable for sex determination in XX hermaphrodites; transcription of her-1 in XX animals is repressed by SDC-2; HER-1A protein has two all-helical domains, with fourteen conserved cysteine residues formin…
WBGene00044702	F46C3.4	F46C3.4	113	86	87	46	36	38	49	50	57	126	86	91	-1.0182	0.00319098			LINK	none available
WBGene00012247	W04E12.2	W04E12.2	219	143	130	79	59	68	66	73	124	89	74	94	-1.01828	0.00288259			LINK	none available
WBGene00000189	arl-5	ZK632.8	1504	1037	958	496	350	618	848	729	899	1567	1349	1556	-1.01837	0.000923622			LINK	arl-5 encodes a paralog of the ADP-ribosylation factor-like protein EVL-20; ARL-5 is an ortholog of mammalian ARL5.
WBGene00022822	ZK813.3	ZK813.3	14004	12273	10151	5560	4285	5391	6231	5514	6334	4371	3603	4299	-1.0184	8.86825e-09			LINK	none available
WBGene00020716	phf-30	T23B12.1	2554	1908	1810	840	671	1112	1491	1457	1747	3333	2759	3308	-1.0187	0.000169415			LINK	none available
WBGene00013254	tag-276	Y57A10A.9	158	123	127	61	53	57	92	85	93	141	96	116	-1.01907	0.000492822			LINK	none available
WBGene00018986	cdo-1	F56F10.3	1894	1799	1551	689	553	948	1133	896	1086	1536	1358	1487	-1.0193	5.83694e-05			LINK	cdo-1 encodes the C. elegans cysteine dioxygenase ortholog; by homology to mammalian enzymes, CDO-1 is predicted to function in cysteine catabolism by catalyzing the oxidation of cysteine to cysteine sulfanate.
WBGene00008316	dod-18	C54G4.6	1631	1255	1111	578	417	676	781	702	857	1003	761	998	-1.01943	0.000116785			LINK	dod-18 encodes a Maf-like protein required for normally short lifespan; dod-18 is repressed in daf-2 mutants and induced in daf-16 mutants, and dod-18(RNAi) lengthens lifespan by 30%; MAF-like proteins are ubiquitous among eukarya, bacteria, and archaea; DOD-18 is orthologous to the N-terminal ~200 residues of human ASMTL (OMIM:300162), and to Bacillus subtilis Maf (Multicopy Associated Filamenta…
WBGene00015742	C13F10.2	C13F10.2	1280	750	703	421	250	473	864	740	898	1194	1018	1127	-1.01944	0.00569252			LINK	none available
WBGene00008747	phf-31	F13E6.3	360	256	211	120	98	127	197	180	206	266	205	297	-1.01963	0.000660854			LINK	none available
WBGene00015936	C17H12.11	C17H12.11	261	262	286	113	70	157	99	79	89	173	113	178	-1.01978	0.00528025			LINK	none available
WBGene00017239	F08B6.1	F08B6.1	828	709	754	273	217	469	795	738	774	1295	999	1250	-1.01998	0.00350899			LINK	none available
WBGene00011916	T22C1.5	T22C1.5	3253	2149	2241	1091	792	1317	2350	2101	2424	4149	3348	3696	-1.02045	0.000393865			LINK	none available
WBGene00009280	F31B9.3	F31B9.3	891	634	519	306	259	287	333	293	356	622	477	549	-1.02087	7.10777e-05			LINK	none available
WBGene00002031	hst-6	Y34B4A.3	798	521	559	251	223	311	443	493	554	575	407	498	-1.02119	0.00023841			LINK	hst-6 encodes the C. elegans ortholog of the heparan sulfate modifying enzyme heparan 6O-sulfotransferase; by homology, HST-6 is predicted to function in heparan sulfate biosynthesis by catalyzing the chain-modifying sulfation of the C6 hydroxyl group of the glucosamine subunits; during development, hst-6 activity is required for normal body size and nervous system development; an hst-6::gfp tran…
WBGene00022850	ZK1127.3	ZK1127.3	4138	2605	2548	1302	989	1588	2461	2217	2506	3010	2341	2963	-1.02179	0.000601177			LINK	none available
WBGene00020219	T05A7.1	T05A7.1	1521	1053	1054	561	409	547	897	738	877	1043	865	1088	-1.02304	3.23002e-05			LINK	none available
WBGene00016567	C41D11.9	C41D11.9	1304	762	645	343	323	459	528	468	519	1041	932	1185	-1.02335	0.00291217			LINK	C41D11.9 encodes an ortholog of Drosophila ALMONDEX, and thus may participate in GLP-1/LIN-12 signalling.
WBGene00009444	F35G12.11	F35G12.11	3787	3031	2557	1357	1026	1522	2082	1857	2068	2218	1853	2159	-1.02347	1.26048e-05			LINK	none available
WBGene00016303	fbxc-32	C32B5.10	1341	899	799	423	340	502	948	855	986	1786	1435	1627	-1.02361	0.00035281			LINK	none available
WBGene00007070	ugt-49	AC3.2	1235	1351	1328	556	383	698	792	779	833	1391	1074	1317	-1.02431	0.000136465			LINK	none available
WBGene00009443	F35G12.7	F35G12.7	773	478	488	214	211	298	543	453	566	710	525	689	-1.02534	0.00102084			LINK	none available
WBGene00011753	T13F3.6	T13F3.6	5125	4035	3707	1873	1517	1969	1059	1065	1111	1652	1454	1660	-1.0256	1.72032e-07			LINK	none available
WBGene00010538	ttr-3	K03H1.3	216	250	236	126	66	102	108	80	138	65	61	87	-1.02656	0.00086703			LINK	K03H1.3 encodes a protein containing a predicted signal sequence followed by a transthyretin-like domain; the product of K03H1.3 belongs to a family of apparently nematode-specific proteins whose function is not yet known.
WBGene00009563	F39H2.3	F39H2.3	4339	3452	3187	1592	1114	1866	2582	2526	2784	5384	4230	5110	-1.0267	5.8757e-05			LINK	none available
WBGene00018088	F36D4.2	F36D4.2	1609	1360	1278	625	390	755	775	695	767	1400	1181	1308	-1.02746	0.000403271			LINK	none available
WBGene00008880	F16B12.4	F16B12.4	594	381	367	176	164	217	385	312	331	268	206	262	-1.02789	0.000519805			LINK	none available
WBGene00022653	ZK105.1	ZK105.1	4640	4973	4724	1812	1376	2774	2334	2315	2580	6657	5368	6368	-1.02893	0.000574953			LINK	none available
WBGene00013086	arrd-2	Y51B9A.4	229	185	145	69	70	92	92	69	88	62	49	52	-1.02975	0.000948585			LINK	none available
WBGene00011930	T22G5.3	T22G5.3	454	350	336	157	148	168	253	208	256	287	203	242	-1.03042	4.96382e-06			LINK	This gene encodes a protein containing an F-box, a motif predicted to mediate protein-protein interactions either with homologs of yeast Skp-1p or with other proteins.
WBGene00022198	Y71H2B.11	Y71H2B.11	674	456	406	184	131	320	249	244	279	380	379	415	-1.03183	0.0147237			LINK	none available
WBGene00016148	C26F1.3	C26F1.3	3279	2504	2286	1149	844	1350	1909	1738	1818	559	519	540	-1.03308	4.94237e-05	-2.13058	3.18954e-198	LINK	none available
WBGene00022252	Y73B6BL.31	Y73B6BL.31a	1594	1550	1628	690	604	688	686	657	791	1467	1112	1328	-1.03446	1.37457e-12			LINK	none available
WBGene00045404	C06C3.11	C06C3.11	46	41	46	13	19	23	8	16	13	40	24	27	-1.03525	0.0443288			LINK	none available
WBGene00004781	set-1	T26A5.7a	8766	6337	6152	2937	2352	3505	6198	5750	6757	11155	8443	9542	-1.03535	2.09413e-05			LINK	set-1 encodes a SET domain-containing protein predicted to function as a histone lysine N-methyltransferase; set-1 is an essential gene that is ubiquitously expressed early in development.
WBGene00010953	clec-190	M199.4	1663	1064	929	526	440	543	452	351	401	1522	1169	1359	-1.03552	0.000191616	1.37151	2.30621e-61	LINK	none available
WBGene00014034	ZK643.2	ZK643.2	1916	1283	1188	612	530	670	1163	1103	1292	1116	959	1218	-1.0356	4.13252e-05			LINK	ZK643.2 encodes a deoxycytidine deaminase; by homology the product of ZK643.2 is predicted to function in deamination of deoxycytidine to deoxyuridine; large-scale expression studies suggest that ZK643.2 may be expressed in hypodermal tissues.
WBGene00017881	F28A12.4	F28A12.4	11241	6822	6343	3496	3070	3510	2986	2750	3141	1872	1440	1731	-1.03598	0.00010874	-1.19472	3.46361e-136	LINK	none available
WBGene00021018	W04B5.1	W04B5.1	84	181	169	58	50	72	76	57	84	54	72	55	-1.03622	0.0205869			LINK	none available
WBGene00020093	R144.3	R144.3a	1858	1459	1255	619	531	735	1357	1222	1458	1395	1431	1575	-1.0369	6.08097e-06			LINK	none available
WBGene00044508	nsy-7	C18F3.4a	730	508	472	238	192	276	490	461	476	424	324	369	-1.03701	0.000163565			LINK	nsy-7 encodes a protein with distant similarity to homeodomain transcription factors; during neuronal development, nsy-7 functions downstream of an initial embryonic signaling pathway involving unc-2, unc-36, and nsy-1, to coordinate the transition from initial establishment to subsequent stable specification (maintenance) of the AWC-ON cell fate; in regulating the AWC-ON fate, NSY-7 likely acts …
WBGene00194852	T28A8.8	T28A8.8a	398	349	304	148	111	175	256	217	270	218	184	193	-1.03712	6.65869e-05			LINK	none available
WBGene00013725	ska-1	Y106G6H.15	2291	1710	1439	743	626	872	1234	1237	1378	1122	917	1162	-1.03742	2.61568e-05			LINK	none available
WBGene00010613	K07A1.6	K07A1.6	913	1445	1305	470	341	704	950	860	1045	1119	947	1185	-1.03809	0.0033755			LINK	K07A1.6 encodes a putative secreted TIL-domain protease inhibitor paralogous to SWM-1, ISL-1, and the products of 11 other C. elegans genes; K07A1.6 and its relatives are collectively similar to other TIL-domain protease inhibitors from nematodes, insects, and vertebrates; K07A1.6 has no obvious function in mass RNAi assays.
WBGene00017717	F22F4.4	F22F4.4a	1648	2339	2394	832	643	1169	1465	1355	1525	1721	1576	1912	-1.039	0.000910266			LINK	none available
WBGene00022190	josd-1	Y71H2AR.3	383	295	279	114	109	171	180	221	231	388	349	379	-1.03917	0.00060913			LINK	none available
WBGene00010902	M79.2	M79.2	962	686	629	288	254	395	374	361	378	690	527	628	-1.03954	0.000304121			LINK	none available
WBGene00000463	ceh-43	C28A5.4	211	174	122	73	71	64	131	104	149	154	143	166	-1.04005	0.000916731			LINK	A homeobox protein of the Distal-less (Dll) class that is required for development of the anterior hypdermis during embryonic morphogenesis for cell adhesion; also affects embryonic and larval viability; it is predominantly expressed in the head hypdodermis, neuronal support cells and CAN neurons.
WBGene00009565	F39H11.1	F39H11.1	4048	3199	2854	1443	1013	1708	1640	1418	1566	2535	1970	2266	-1.04029	6.88414e-05			LINK	none available
WBGene00019723	fbxc-47	M02B7.1	1579	1134	1093	530	386	653	1063	1080	1144	1631	1246	1382	-1.04104	0.000232757			LINK	none available
WBGene00016364	nhr-161	C33G8.7	239	160	159	82	69	79	116	134	138	99	81	111	-1.04146	0.000669616			LINK	none available
WBGene00002124	inx-2	F08G12.10	931	820	846	380	365	327	399	389	459	972	782	951	-1.04166	1.66637e-10			LINK	none available
WBGene00007018	mdt-18	C55B7.9	2088	1401	1282	648	563	750	1312	1147	1484	1359	1174	1527	-1.04194	6.46385e-05			LINK	none available
WBGene00001912	his-38	K03A1.6	104	203	148	63	51	73	82	67	86	47	32	40	-1.04196	0.00694783	-1.36105	3.63601e-07	LINK	his-38 encodes an H4 histone; by homology, HIS-38 is predicted to function as a nucleosome component required for packaging of DNA into chromatin; his-38 is a replication-dependent histone locus that does not reside in a cluster, but exists as a single histone locus on the X chromosome.
WBGene00009004	pfd-6	F21C3.5	6933	5378	4973	2368	1677	3068	5242	4650	5454	4848	7228	8332	-1.04282	0.000225779			LINK	pfd-6 encodes a putative prefoldin 6 subunit, orthologous to human PFDN6 (OMIM:605660), required for normal microtubule growth and distal tip cell migration; PFD-6 is expressed cytoplasmically in most, if not all, tissues, including the germline; in mass RNAi assays, PFD-6 is required for normal mitotic spindle position, embryonic and larval viability, fertility, body shape, vulval development, a…
WBGene00008726	F13A7.11	F13A7.11	97	107	92	47	29	46	111	120	146	55	56	44	-1.04307	0.0027021	-1.65008	5.5493e-13	LINK	none available
WBGene00015789	syx-6	C15C7.1	540	353	365	179	133	206	153	131	148	299	217	266	-1.04412	0.000569956			LINK	none available
WBGene00006574	tin-13	DY3.1	5457	4218	4043	1934	1374	2333	3644	3281	3972	2618	3834	4680	-1.04552	6.20793e-05			LINK	none available
WBGene00018959	F56D1.1	F56D1.1	4191	3292	3009	1494	1077	1740	2971	2925	3010	5329	4230	5161	-1.04553	2.72435e-05			LINK	none available
WBGene00016745	C48B6.9	C48B6.9	313	236	240	127	91	107	152	124	141	192	120	149	-1.0462	6.53707e-05			LINK	none available
WBGene00012900	Y46G5A.8	Y46G5A.8	236	180	160	81	79	76	107	127	116	122	109	124	-1.04692	0.000153031			LINK	This gene encodes a protein containing an F-box, a motif predicted to mediate protein-protein interactions either with homologs of yeast Skp-1p or with other proteins.
WBGene00010569	K04G2.11	K04G2.11	590	478	478	211	168	256	285	282	269	531	417	584	-1.04743	2.25016e-05			LINK	none available
WBGene00009434	F35E12.10	F35E12.10	2956	3367	3286	1378	1149	1425	2380	2376	2729	2310	1815	2118	-1.04797	3.8979e-11			LINK	none available
WBGene00010699	K08H10.9	K08H10.9	1669	1350	1330	582	381	823	1039	879	1037	1745	1409	1875	-1.04801	0.00133362			LINK	none available
WBGene00004151	pqn-68	T16G1.10a	688	456	558	190	170	339	255	201	217	320	363	423	-1.04814	0.00511351			LINK	The protein product of this gene was predicted to contain a glutamine/asparagine (Q/N)-rich ('prion') domain, by the algorithm of Michelitsch and Weissman (as of the WS72 release of WormBase, i.e., in wormpep77).
WBGene00007270	C03C10.4	C03C10.4	5943	4141	3812	1876	1448	2367	3394	3186	3641	4287	3442	4042	-1.04824	0.00018202			LINK	none available
WBGene00020027	R12C12.7	R12C12.7	3938	2987	2828	1321	1006	1669	2666	2398	2701	4491	3751	4327	-1.04918	6.34333e-05			LINK	none available
WBGene00018335	F42A9.6	F42A9.6a	4561	3851	3599	1510	1186	2219	2745	2489	2922	3494	3764	4663	-1.04994	0.000230447			LINK	none available
WBGene00019476	K07C11.3	K07C11.3	854	702	724	312	240	383	438	376	373	336	286	376	-1.05104	2.19547e-05			LINK	none available
WBGene00009346	F32H2.10	F32H2.10	1744	1067	966	517	437	588	808	697	852	639	508	629	-1.05114	0.000385191			LINK	none available
WBGene00012277	ccch-3	W05B10.2	2144	1656	1563	772	477	948	883	938	920	2254	1830	2136	-1.05171	0.000624615			LINK	none available
WBGene00017083	kin-33	DC2.7a	168	108	126	62	52	51	56	49	52	74	59	62	-1.05201	0.00189494			LINK	none available
WBGene00022484	fbxa-77	Y119D3B.6	264	219	179	91	81	98	104	98	123	159	143	184	-1.05214	6.6673e-05			LINK	none available
WBGene00011740	mrpl-51	T12G3.5	4332	3010	2764	1400	1088	1639	2541	2400	2756	2799	2391	2790	-1.05277	6.56734e-05			LINK	none available
WBGene00019197	H14A12.5	H14A12.5	306	283	272	129	94	129	237	255	281	570	413	506	-1.05564	4.25492e-06			LINK	none available
WBGene00006389	taf-7.2	Y111B2A.16	3965	2469	2503	1238	1029	1379	3069	2963	3181	5472	3998	4298	-1.05568	7.32696e-05			LINK	none available
WBGene00010904	ugt-62	M88.1	7443	7027	7006	2838	2103	3833	5164	4610	5035	7770	5473	6533	-1.05631	5.52288e-05			LINK	none available
WBGene00306002			271	306	286	107	78	167	188	172	189	251	250	271	-1.05685	0.00263326			LINK
WBGene00018907	F55G1.15	F55G1.15	249	186	208	94	73	96	114	129	140	326	222	302	-1.05688	0.000133273			LINK	none available
WBGene00010140	F56A8.4	F56A8.4	2372	2020	1838	820	691	1025	1926	1764	1910	3025	2713	3276	-1.05729	1.1999e-06			LINK	none available
WBGene00020783	blos-4	T24H7.4	2002	1303	1331	629	472	789	1575	1397	1578	2231	1967	2424	-1.05751	0.000384884			LINK	none available
WBGene00019215	H20E11.3	H20E11.3a	205	303	302	115	114	102	96	99	101	107	89	99	-1.05803	0.00021253			LINK	none available
WBGene00015930	C17H12.4	C17H12.4	1014	877	883	378	305	447	403	359	444	836	683	848	-1.06015	7.31822e-07			LINK	none available
WBGene00015939	C18A3.1	C18A3.1	1715	1281	1192	585	403	715	1069	964	1224	1823	1438	1774	-1.06071	0.000219583			LINK	none available
WBGene00002199	kin-15	M176.6a	883	897	792	347	249	449	333	303	374	1079	725	918	-1.06162	5.68302e-05	1.04695	4.22344e-27	LINK	kin-15 encodes a novel receptor protein tyrosine kinase; like kin-16, with which it is cotranscribed, kin-15 encodes a protein that displays some unusual features, including a very small extracellular domain (50 amino acids) that lacks a cysteine-rich region typical of ligand-binding domains of known receptor tyrosine kinases, an unusual amino acid substitution in the subdomain VI motif, and a la…
WBGene00016568	C41G11.1	C41G11.1a	1298	971	804	439	332	475	1065	1001	1060	1017	805	938	-1.06164	4.0096e-05			LINK	none available
WBGene00043156	C27F2.9	C27F2.9	3362	2329	2357	1137	790	1348	2033	1917	2044	2665	2099	2540	-1.06166	0.000178704			LINK	none available
WBGene00014019	ZK632.12	ZK632.12	4948	3691	3740	1714	1263	2060	4062	3613	4196	7424	6032	6939	-1.06173	3.17493e-05			LINK	ZK632.12 encodes one of 12 C. elegans FYVE-domain containing proteins and is orthologous to mammalian Phafin2; as loss of ZK632.12 activity via RNAi screens results in no obvious defects, the precise role of ZK632.12 in C. elegans development and/or behavior is not yet known.
WBGene00003539	nas-20	T11F9.3	1677	2094	1987	838	551	959	1403	1300	1461	1201	969	1157	-1.06187	5.7083e-05			LINK	nas-20 encodes an astacin-like metalloprotease.
WBGene00019108	F59D6.7	F59D6.7	250	126	120	49	63	88	58	69	66	133	108	140	-1.06257	0.0253143			LINK	none available
WBGene00018939	fbxa-190	F56C3.2	75	124	127	49	34	50	44	43	47	96	88	107	-1.06442	0.0103295			LINK	This gene encodes a protein containing an F-box, a motif predicted to mediate protein-protein interactions either with homologs of yeast Skp-1p or with other proteins; this gene's encoded protein also contains an FTH/DUF38 motif, which may also mediate protein-protein interaction.
WBGene00010767	K11B4.2	K11B4.2	1399	1009	851	448	322	548	905	858	915	1070	775	869	-1.06524	0.000375755			LINK	none available
WBGene00012783	Y43C5A.3	Y43C5A.3	357	349	333	152	104	166	230	201	230	218	186	214	-1.06551	1.96033e-05			LINK	none available
WBGene00017142	EEED8.14	EEED8.14	1728	1430	1239	616	464	700	1300	1363	1385	1193	906	1068	-1.06551	4.0054e-06			LINK	none available
WBGene00007365	C06B3.6	C06B3.6	572	282	220	135	126	171	435	375	479	114	102	107	-1.06598	0.0146714	-2.36913	2.06549e-69	LINK	none available
WBGene00255594			72	56	48	20	18	33	32	48	27	27	33	34	-1.06679	0.0300595			LINK
WBGene00016446	C35D10.10	C35D10.10	6236	4467	4078	1962	1544	2468	4272	3929	4518	7202	6268	7117	-1.06709	7.17524e-05			LINK	none available
WBGene00015843	C16C8.5	C16C8.5	895	681	596	312	214	352	481	410	492	699	557	665	-1.06831	0.000135221			LINK	none available
WBGene00011435	T04D3.8	T04D3.8	609	373	305	173	137	208	423	363	401	237	218	272	-1.06955	0.00240024	-1.08235	8.19794e-20	LINK	none available
WBGene00010086	F55B11.4	F55B11.4	1180	1687	1630	602	485	735	781	776	925	784	674	804	-1.07003	4.802e-05			LINK	none available
WBGene00011202	R10E4.6	R10E4.6	118	134	98	50	31	60	74	72	77	171	130	143	-1.07087	0.00392298			LINK	none available
WBGene00011497	T05F1.13	T05F1.13	498	324	317	146	110	203	205	193	200	476	374	443	-1.07222	0.00228209			LINK	none available
WBGene00018391	rpb-4	F43E2.2	7386	5593	4939	2414	1829	2970	3667	3374	3778	4880	3907	4346	-1.07289	3.98051e-05			LINK	none available
WBGene00011924	T22C8.3	T22C8.3	441	240	253	135	86	156	228	180	229	234	173	241	-1.07329	0.00636057			LINK	none available
WBGene00017538	ceh-49	F17A9.6	1391	798	767	411	337	441	759	745	838	1026	778	922	-1.0744	0.000486553			LINK	ceh-49 encodes a divergent ONECUT class CUT homeobox protein with a single N-terminal cut domain; CEH-49 has an atypical tyrosine residue at position 48 of its homeodomain rather than a phenylalanine or tryptophan residue; the cut domain may be a compact DNA-binding domain composed of alpha helices; phylogenetically, CEH-49 is (somewhat distantly) affiliated with CEH-48, Drosophila ONECUT, and ma…
WBGene00045488	F57B1.9	F57B1.9a	234	208	230	76	56	139	81	91	90	197	156	209	-1.0754	0.0107537			LINK	none available
WBGene00011319	T01C3.2	T01C3.2	3000	2584	2294	1082	666	1423	1280	1122	1223	2170	2118	2275	-1.07554	0.000613638			LINK	T01C3.2 encodes a divergent ortholog of Drosophila melanogaster E(Y)2 and budding yeast Sus1p; by orthology, T01C3.2 is predicted to enable both transcriptional activation and silencing in chromatin.
WBGene00022398	Y97E10AR.3	Y97E10AR.3	3098	2240	2133	951	852	1197	1571	1505	1760	1624	1190	1473	-1.07634	8.57239e-06			LINK	none available
WBGene00017002	D1007.4	D1007.4	1069	851	711	360	259	437	551	527	610	960	863	1046	-1.07659	0.000109061			LINK	none available
WBGene00019456	K06H7.2	K06H7.2	531	344	323	140	130	210	272	241	265	598	483	587	-1.07702	0.00158033			LINK	This gene encodes a protein containing an F-box, a motif predicted to mediate protein-protein interactions either with homologs of yeast Skp-1p or with other proteins.
WBGene00011353	T01H8.2	T01H8.2	779	754	719	272	235	397	345	321	358	663	490	638	-1.07846	3.97064e-05			LINK	none available
WBGene00007807	C29F3.7	C29F3.7a	2448	3103	2889	1202	1062	1132	1303	1358	1377	1380	1076	1334	-1.07863	9.67834e-12			LINK	none available
WBGene00009243	F29C6.1	F29C6.1a	1326	1274	1248	525	360	662	418	363	480	836	630	772	-1.08032	5.02997e-05			LINK	none available
WBGene00045276	F18E3.13	F18E3.13	204	106	87	62	35	62	9	7	13	28	18	20	-1.08033	0.0299281			LINK	none available
WBGene00018337	F42A9.8	F42A9.8	1331	1027	843	465	320	497	722	614	786	536	403	595	-1.08047	5.6616e-05			LINK	none available
WBGene00045473	F30A10.14	F30A10.14	446	422	359	159	118	214	342	296	337	213	247	265	-1.08147	0.000161951			LINK	none available
WBGene00015621	C09B7.2	C09B7.2	680	480	402	179	197	246	259	226	211	170	114	149	-1.08233	0.000215474	-1.07097	1.05029e-11	LINK	none available
WBGene00004279	rab-21	T01B7.3	2506	1705	1521	762	591	938	1146	1098	1279	1399	1120	1310	-1.0825	0.0001664			LINK	rab-21 encodes a Rab GTPase most closely related to the Drosophila and vertebrate Rab21 GTPases and Saccharomyces cerevisiae VPS21; by homology, RAB-21 is predicted to be involved in membrane trafficking/vesicle transport; loss of rab-21 activity via RNAi results in 7-8% embryonic lethality.
WBGene00019757	memb-2	M03E7.5	2390	1728	1624	780	584	934	1242	1156	1309	1389	1115	1367	-1.08307	4.70034e-05			LINK	none available
WBGene00016112	C25H3.3	C25H3.3	2032	1502	1351	632	473	846	1316	1208	1315	2487	1997	2311	-1.08412	0.00024482			LINK	none available
WBGene00010619	K07A1.15	K07A1.15	279	224	233	99	69	127	123	119	114	288	258	289	-1.08447	0.000660032			LINK	none available
WBGene00189958	F45H11.8	F45H11.8	1632	1268	1108	506	458	633	951	812	863	1034	1108	1365	-1.08561	3.77633e-06			LINK	none available
WBGene00004827	skr-21	K08H2.1	185	84	76	40	37	60	126	147	132	95	101	77	-1.08676	0.0415819			LINK	The skr-21 gene encodes a homolog of Skp1 in S. cerevisiae that has no known function in vivo, since skr-21(RNAi) animals are at least superficially normal.
WBGene00022532	ZC155.4	ZC155.4	6984	4975	5007	2235	1735	2797	5449	5477	5977	9087	7645	8951	-1.0891	3.3675e-05			LINK	none available
WBGene00019388	K04F1.9	K04F1.9	254	164	164	76	52	104	118	117	140	161	153	186	-1.08935	0.00580825			LINK	none available
WBGene00013986	ZK512.7	ZK512.7	4337	6089	5574	2094	1496	2798	2524	2463	2742	1769	1369	1646	-1.08989	0.000219636	-1.07158	1.83244e-98	LINK	none available
WBGene00023487	mrps-24	F33D4.8	2847	2475	2159	940	687	1348	2003	1821	2083	2444	2384	2826	-1.09024	0.000224578			LINK	none available
WBGene00013610	fbxa-206	Y102A5C.1	2632	1710	1706	772	629	1006	1794	1724	1967	2801	2269	2675	-1.09044	0.000181384			LINK	This gene encodes a protein containing an F-box, a motif predicted to mediate protein-protein interactions either with homologs of yeast Skp-1p or with other proteins; this gene's encoded protein also contains an FTH/DUF38 motif, which may also mediate protein-protein interaction.
WBGene00016449	C35D10.13	C35D10.13	8277	5443	4863	2650	1901	2841	4572	4207	4746	1564	1264	1446	-1.09108	9.67451e-05	-2.03929	0	LINK	none available
WBGene00017105	E02H9.7	E02H9.7	548	506	365	213	149	201	289	251	298	275	217	265	-1.09223	9.19961e-06			LINK	none available
WBGene00007391	C06H2.7	C06H2.7a	2061	1195	1180	610	433	721	691	672	825	880	772	929	-1.09256	0.00094228			LINK	none available
WBGene00015010	ptps-1	B0041.6a	510	481	508	216	133	250	258	188	209	428	362	409	-1.09267	0.000173607			LINK	B0041.6 is orthologous to the human gene 6-PYRUVOYLTETRAHYDROPTERIN SYNTHASE (PTS; OMIM:261640), which when mutated leads to disease.
WBGene00012958	Y47H10A.2	Y47H10A.2	100	58	71	25	34	32	56	41	49	112	71	104	-1.09274	0.0150913			LINK	This gene encodes a protein containing an F-box, a motif predicted to mediate protein-protein interactions either with homologs of yeast Skp-1p or with other proteins.
WBGene00044206	T26H5.9	T26H5.9	93	238	273	74	68	100	296	206	248	178	149	186	-1.09331	0.0361479			LINK	none available
WBGene00044696	F52E1.14	F52E1.14	10049	12227	11785	4540	3319	5702	7691	7196	8171	6637	5594	6857	-1.09501	1.40936e-05			LINK	none available
WBGene00021135	W10G11.2	W10G11.2	203	141	134	75	55	60	95	101	99	133	146	167	-1.09524	0.000674292			LINK	none available
WBGene00015355	C02F12.5	C02F12.5	785	490	480	273	174	251	490	414	526	531	405	502	-1.09566	0.000420985			LINK	C02F12.5 encodes a putatively secreted protein with a Kunitz/bovine pancreatic trypsin inhibitor domain; C02F12.5 has no obvious function in mass RNAi assays.
WBGene00008403	D2013.3	D2013.3	356	245	207	117	84	119	259	244	294	498	435	531	-1.09652	0.00057673			LINK	none available
WBGene00019143	H01M10.1	H01M10.1	283	178	184	93	75	88	97	86	101	129	127	154	-1.09708	0.000481088			LINK	none available
WBGene00010981	R03A10.1	R03A10.1	296	166	138	83	69	85	126	112	123	51	54	72	-1.09715	0.00531909	-1.40159	2.94e-10	LINK	none available
WBGene00009212	F28D1.2	F28D1.2	373	312	257	125	118	129	172	168	160	386	259	344	-1.09851	1.97687e-06			LINK	none available
WBGene00020163	T02G5.3	T02G5.3	312	162	150	69	51	126	92	61	81	325	226	297	-1.09892	0.0339071	1.47636	1.76676e-17	LINK	none available
WBGene00008363	D1046.2	D1046.2	4078	2646	2660	1242	931	1543	2437	2385	2713	5179	3994	4710	-1.0991	0.00017083			LINK	none available
WBGene00022583	mrps-18A	ZC262.8	3964	3137	2939	1321	913	1737	2850	2429	2908	4630	3929	4418	-1.10073	0.000143265			LINK	none available
WBGene00021725	bath-9	Y49F6C.3	213	155	122	64	54	75	130	118	117	102	106	109	-1.10077	0.00136024			LINK	none available
WBGene00019864	ceh-93	R04A9.5	1024	625	545	297	236	332	609	561	613	685	550	670	-1.10134	0.000492822			LINK	none available
WBGene00008177	C48D1.1	C48D1.1a	292	149	145	73	59	99	123	100	125	168	156	199	-1.10159	0.0118476			LINK	none available
WBGene00019427	atg-16.2	K06A1.5	1839	1167	1025	537	433	619	1128	1073	1189	1748	1398	1605	-1.10162	0.000191049			LINK	atg-16.2 encodes a divergent ortholog of the autophagic budding yeast protein Atg16p, and of human ATG16L1 (OMIM:610767, associated with Crohn disease) and ATG16L2; ATG-16.2 is paralogous to ATG-16.1; ATG-16.2 has no obvious function in mass RNAi assays.
WBGene00016864	C52A10.3	C52A10.3	206	120	125	55	37	86	68	67	77	206	173	238	-1.10309	0.0190187	1.16289	8.03393e-10	LINK	none available
WBGene00008232	C50F4.4	C50F4.4	796	577	481	240	168	322	515	503	629	789	564	716	-1.1031	0.00103987			LINK	none available
WBGene00043279	F22D6.8	F22D6.8	457	340	324	135	95	212	323	225	292	399	428	405	-1.10365	0.00326077			LINK	none available
WBGene00013392	Y62H9A.4	Y62H9A.4	6167	5894	5023	2470	1841	2432	4934	4277	4846	6028	4680	5757	-1.10369	2.81233e-11			LINK	none available
WBGene00017726	F22H10.2	F22H10.2	114	85	56	39	30	31	42	33	29	56	56	61	-1.10628	0.010829			LINK	none available
WBGene00138720	F58H1.8	F58H1.8	1532	1067	1083	469	350	631	900	805	957	1747	1393	1662	-1.10736	0.000257972			LINK	none available
WBGene00013876	ceh-74	ZC376.4	331	192	216	94	86	111	169	132	145	156	139	159	-1.10756	0.000887647			LINK	none available
WBGene00013647	Y105C5B.5	Y105C5B.5	4413	3308	3058	1445	1062	1733	1656	1425	1770	2900	2450	2829	-1.10797	1.96033e-05			LINK	none available
WBGene00010196	F57C2.4	F57C2.4	1822	1449	1129	578	497	649	923	668	849	347	491	564	-1.10812	1.78519e-06	-1.152	5.33074e-05	LINK	none available
WBGene00020722	T23B12.8	T23B12.8a	212	180	183	62	56	108	89	101	102	152	124	154	-1.10851	0.00246158			LINK	none available
WBGene00044431	W03G9.8	W03G9.8	1926	1288	1123	561	442	698	828	633	774	588	545	725	-1.10878	0.000192326			LINK	none available
WBGene00003975	pen-2	T28D6.9	2010	1205	1134	539	472	694	934	906	1036	1575	1474	1576	-1.10924	0.000355721			LINK	none available
WBGene00021468	epg-2	Y39G10AR.10	1691	1162	1093	505	531	508	856	847	927	1709	1261	1449	-1.11246	1.36503e-06			LINK	none available
WBGene00009971	F53C11.1	F53C11.1	560	937	956	348	268	352	387	361	416	782	598	709	-1.11262	0.000235377			LINK	none available
WBGene00007015	mdt-11	R144.9	2092	1424	1294	607	518	757	933	872	979	2151	1747	1981	-1.11262	4.57783e-05			LINK	none available
WBGene00007429	C08B6.8	C08B6.8a	3396	2792	2691	1150	868	1466	2187	1960	2294	2884	2440	2901	-1.1127	8.97392e-06			LINK	none available
WBGene00001486	frh-1	F59G1.7	1382	1041	990	445	287	607	627	563	589	1162	899	1104	-1.11279	0.000769597			LINK	frh-1 encodes the C. elegans frataxin ortholog (mutations in human frataxin, FXN, are associated with Friedreich ataxia, OMIM:606829, OMIM:229300); by homology, FRH-1 is predicted to be a mitochondrial protein required for biogenesis of iron-sulfur clusters, co-factors necessary for proper function of electron transport chain proteins; in C. elegans, loss of frh-1 activity via RNAi results in sma…
WBGene00014109	ZK856.8	ZK856.8	4526	3730	3342	1593	1150	1804	2665	2568	2840	4010	3071	3863	-1.11319	1.49029e-06			LINK	none available
WBGene00164985	ZK1010.10	ZK1010.10	254	206	129	73	67	89	153	127	123	168	155	144	-1.11351	0.00152416			LINK	none available
WBGene00001693	grd-4	T01B10.1	194	152	182	75	56	77	94	86	71	125	140	157	-1.11353	0.000166824			LINK	grd-4 encodes a hedgehog-like protein, with an N-terminal signal sequence and a C-terminal Ground domain; the Ground domain is predicted to form a cysteine-crosslinked protein involved in intercellular signalling, and it has subtle similarity to the N-terminal Hedge domain of HEDGEHOG proteins; GRD-4 is weakly required for normal molting; GRD-4 is also required for normal adult alae formation, gr…
WBGene00007890	C33A12.19	C33A12.19	760	721	671	268	192	383	319	310	311	572	459	566	-1.11469	0.000208555			LINK	none available
WBGene00016457	C35E7.5	C35E7.5a	866	777	747	321	332	283	397	394	374	341	269	287	-1.11469	1.39554e-11			LINK	none available
WBGene00017329	ugt-39	F10D2.2a	435	331	305	127	132	159	169	144	186	224	169	221	-1.11574	1.10736e-05			LINK	none available
WBGene00044608	glrx-22	C07G1.8	2219	1847	1653	727	556	952	964	805	931	1174	955	1223	-1.11611	1.76877e-05			LINK	none available
WBGene00009544	F38E11.9	F38E11.9	218	181	145	63	46	103	65	66	82	184	136	182	-1.11612	0.00603973			LINK	none available
WBGene00000500	chn-1	T09B4.10	6352	4432	4094	1990	1481	2336	3799	3640	4110	6545	5179	6036	-1.11869	3.10147e-05			LINK	chn-1 encodes an ortholog of mammalian carboxyl-terminus of Hsc70 interacting protein (CHIP), an E4 ubiquitin-chain elongation factor; chn-1 is ubiquitously expressed; chn-1(by155) mutants are viable and superficially normal, but have reduced fertility and arrest as larvae if subjected to heat shock; chn-1 overexpression causes either embryonic lethality (if strong) or defective egg-laying and lo…
WBGene00014030	glb-1	ZK637.13	2598	2719	2403	1020	791	1204	1196	1165	1362	1527	1202	1422	-1.11884	1.95212e-08			LINK	glb-1 encodes a globin; glb-1 transcription is uninduced by anoxia, but repressed by DAF-2 signalling in a DAF-16 dependent manner; glb-1 is expressed in distal germline, late embryonic cells that are probably hypodermal precursors, and young adults; glb-1 transcription is lower in L3 larvae than in adults, while in adults it is higher than that of most other globins; glb-1 has no obvious functio…
WBGene00000829	ctb-1	MTCE.21	149297	129448	134148	49071	36037	76332	169805	159277	185769	130998	140129	164318	-1.11915	0.000361284			LINK	The ctb-1 gene resides on the mitochondrial chromosome, and encodes the cytochrome b protein of mitochondrial complex III; mutation of ctb-1 suppresses the slow embryonic development of isp-1 mutants, while enhancing their paraquat resistance.
WBGene00235315			60	57	35	22	19	18	29	36	25	19	66	59	-1.11956	0.0198819			LINK
WBGene00016145	C26E6.12	C26E6.12	2894	2322	2435	1006	784	1203	1829	1747	2003	3935	2948	3606	-1.11958	8.1736e-07			LINK	none available
WBGene00009349	F32H5.3	F32H5.3a	459	371	352	166	112	184	195	200	205	236	177	220	-1.11961	4.18758e-05			LINK	none available
WBGene00011124	sdz-27	R07H5.4	2013	1896	1799	798	513	920	930	800	861	1090	816	1140	-1.12125	1.1153e-05			LINK	none available
WBGene00015495	C05E11.6	C05E11.6	62	37	52	17	23	19	33	34	43	22	25	22	-1.12139	0.0291001	-1.03762	0.00769888	LINK	none available
WBGene00011741	T12G3.6	T12G3.6a	9073	6652	6126	2827	2142	3538	5907	5501	6322	10703	8288	9921	-1.12195	2.65458e-05			LINK	none available
WBGene00045273	C08A9.11	C08A9.11	73	106	107	41	27	44	39	34	37	89	50	78	-1.12213	0.00574677			LINK	none available
WBGene00004985	spo-11	T05E11.4	3071	2250	2135	923	716	1263	1742	1634	1985	3378	2583	3122	-1.12225	9.60076e-05			LINK	spo-11 encodes an ortholog of Spo11p in S. cerevisiae that is required for meiotic DNA recombination, and (in conjunction with CHK-2 and MRE-11) for the localization of RAD-51 to foci in late zygotene/early pachytene nuclei; like its yeast ortholog, SPO-11 is related to a subunit of archaebacterial topoisomerase VI, and probably causes double-stranded DNA breaks through a topoisomerase-like trans…
WBGene00009260	calm-1	F30A10.1	432	306	286	142	91	166	204	169	196	339	284	342	-1.12289	0.000674292			LINK	none available
WBGene00022357	kbp-4	Y92C3B.1	2817	1835	1696	784	618	1064	1590	1272	1498	2191	1939	2390	-1.1233	0.00033123			LINK	none available
WBGene00015063	B0228.6	B0228.6	262	134	142	45	69	94	200	160	197	256	194	255	-1.12371	0.0186212			LINK	none available
WBGene00195070	C16C8.20	C16C8.20	95	68	76	28	30	35	72	56	68	73	45	77	-1.12472	0.0038109			LINK	none available
WBGene00013799	athp-3	Y116A8C.22	225	113	85	47	59	57	86	50	71	71	41	57	-1.12478	0.0213041			LINK	none available
WBGene00011224	R10H10.6	R10H10.6	789	623	552	255	182	326	455	391	481	651	748	835	-1.12487	0.000120466			LINK	none available
WBGene00015853	C16C8.16	C16C8.16	3085	2384	2337	1004	714	1318	1938	1934	1992	2522	2150	2458	-1.12584	7.26557e-05			LINK	none available
WBGene00012074	T27A8.2	T27A8.2	455	289	293	145	113	145	301	278	331	362	321	357	-1.1272	0.000130386			LINK	none available
WBGene00008394	D1086.7	D1086.7	1706	1792	1582	722	454	800	1114	997	1138	549	477	576	-1.12726	6.08097e-06	-1.39588	1.99998e-76	LINK	none available
WBGene00015494	C05E11.3	C05E11.3	363	225	233	120	97	102	181	159	167	252	209	251	-1.12832	0.000206787			LINK	none available
WBGene00008488	F01D4.5	F01D4.5a	2916	2022	1804	902	661	1049	1578	1492	1705	2201	1671	1993	-1.12862	5.33245e-05			LINK	none available
WBGene00008457	E02H1.5	E02H1.5	3013	2159	1982	948	688	1137	2143	2063	2363	2859	2581	3138	-1.12879	4.23748e-05			LINK	E02H1.5 encodes an ortholog of human CLE/CGI-99/C14orf166, a putative transcription factor that binds ninein and is overexpressed in brain tumors; E02H1.5 is coexpressed with pme-2 in an operon, and thus, like PME-2, may function in DNA repair.
WBGene00009927	F52B11.5	F52B11.5	96	71	71	25	26	41	34	31	39	78	56	96	-1.13079	0.00822701			LINK	none available
WBGene00045407	T07D4.5	T07D4.5	2189	1567	1462	640	469	909	1333	1139	1400	2050	1751	2214	-1.13107	0.00038682			LINK	none available
WBGene00013553	Y75B8A.18	Y75B8A.18a	1362	967	840	380	280	563	842	720	869	1424	1380	1629	-1.13171	0.000965353			LINK	none available
WBGene00000145	apc-11	F35G12.9	2024	1723	1459	658	432	921	1191	955	1122	2051	1577	2029	-1.13234	0.000416205			LINK	apc-11 encodes an E3 ubiquitin ligase that is orthologous to subunit 11 of the anaphase promoting complex (APC); apc-11 is required for embryonic development past the one-cell stage; APC-11 functions together with the LET-70/UBC-2 E2-conjugating enzyme: purified APC-11 and LET-70 exhibit ubiquitination activity in vitro.
WBGene00010957	MTCE.3	MTCE.3	3833	3335	2540	993	914	1821	11740	9720	10150	888	5036	4609	-1.13287	0.000864994	-1.90076	0.0190698	LINK	none available
WBGene00009673	F43G9.13	F43G9.13	1901	1421	1386	638	408	777	1404	1200	1341	2313	1877	2319	-1.13344	0.000153263			LINK	none available
WBGene00006388	taf-7.1	F54F7.1	238	164	134	59	62	85	145	111	124	109	88	94	-1.13358	0.00172166			LINK	The taf-7.1 gene encodes an ortholog of mammalian TATA-binding protein associated factor TAF7L (TAFIIQ, OMIM:300314) that in mice exhibits testis-specific expression; TAF-7 function in C. elegans is not yet known, as taf-7 inactivation by RNA interference does not result in any obvious developmental defects.
WBGene00009209	F28C6.10	F28C6.10	76	68	66	22	29	30	29	32	39	19	9	19	-1.13372	0.00387004	-1.48044	0.00064253	LINK	none available
WBGene00010234	ttr-50	F58B3.9	2527	1912	1575	844	699	774	2395	2117	2445	2103	1650	1980	-1.13536	1.37914e-07			LINK	none available
WBGene00007431	C08B6.11	C08B6.11	345	373	364	110	101	206	153	134	143	335	274	324	-1.13662	0.00151264			LINK	none available
WBGene00014020	ZK632.14	ZK632.14	1532	1398	1282	535	380	710	792	748	850	1301	1088	1297	-1.13665	3.1735e-05			LINK	ZK632.14 encodes an ortholog of Rpp25, a protein subunit shared by the endoribonucleases RNase MRP and RNAse P; RNAse MRP cleaves mitochondrial RNA in mitochondrial DNA synthesis, nucleolar pre-rRNA in ribosome synthesis, and at least one mRNA (CLB2) involved in cell-cycle regulation; RNAse P cleaves tRNA precursors to produce their mature 5' end; ZK632.14 may dissociate from the RNase MRP comple…
WBGene00022791	ZK686.1	ZK686.1	4744	3129	2696	1379	973	1711	1747	1555	1942	1809	1573	1806	-1.13841	0.000316032			LINK	none available
WBGene00013393	Y62H9A.5	Y62H9A.5	29707	20994	18231	9791	6920	9829	14525	12464	14080	13019	10147	12336	-1.13857	6.67082e-06			LINK	none available
WBGene00010964	MTCE.26	MTCE.26	316768	233745	234725	94601	69066	138855	348937	342860	388065	318679	299856	339488	-1.13871	0.000266899			LINK	MTCE.26 is a mitochondrial gene that encodes subunit 1 of cytochrome c oxidase; the product of MTCE.26 is predicted to function as part of the cytochrome c oxidase complex (also known as Complex IV) that is the the terminal member of the electron transport chain.
WBGene00021165	Y5H2B.3	Y5H2B.3	53	44	33	20	10	20	13	11	18	38	24	29	-1.1395	0.0395532			LINK	none available
WBGene00021037	fbxa-203	W05F2.5	454	417	409	151	100	242	206	163	218	455	400	419	-1.14017	0.002088			LINK	This gene encodes a protein containing an F-box, a motif predicted to mediate protein-protein interactions either with homologs of yeast Skp-1p or with other proteins; this gene's encoded protein also contains an FTH/DUF38 motif, which may also mediate protein-protein interaction.
WBGene00023489	F42A10.9	F42A10.9	469	397	382	153	131	196	230	207	272	342	257	287	-1.14045	3.51324e-06			LINK	none available
WBGene00008442	E01B7.2	E01B7.2	1666	1255	1259	481	393	733	931	953	922	1475	1198	1318	-1.14057	0.000190247			LINK	none available
WBGene00007022	mdt-22	ZK970.3	2547	2035	1763	798	586	1051	1504	1302	1397	2469	1998	2370	-1.14147	4.85617e-05			LINK	none available
WBGene00003524	nas-5	T23H4.3	93	82	103	23	26	58	40	29	33	55	50	61	-1.14183	0.0295463			LINK	nas-5 encodes an astacin-like metalloprotease; loss of nas-5 activity in an RNAi hypersensitive strain results in axon guidance defects, including a failure of DD/VD motoneuron commissures to reach the dorsal cord, defasciculation of the dorsal nerve cord, and midline crossing defects in the ventral nerve cord.
WBGene00011342	T01G5.7	T01G5.7	682	566	562	268	176	254	373	384	445	642	463	605	-1.14196	1.00351e-06			LINK	none available
WBGene00007963	cyp-25A1	C36A4.1	1153	905	868	404	297	424	474	428	460	1020	799	911	-1.14316	3.70885e-07			LINK	cyp-25A1 encodes one of ~80 C. elegans cytochrome P450s: membrane-associated, heme-containing NADPH-dependent monooxygenases that catalyze the oxidative metabolism of a variety of exogenous compounds and endogenous substrates.
WBGene00045366	Y17D7C.3	Y17D7C.3	625	590	481	201	162	286	236	226	243	428	355	428	-1.14361	4.58111e-05			LINK	none available
WBGene00018140	F37B4.10	F37B4.10	811	489	511	229	178	288	393	360	447	587	428	542	-1.1443	0.00040145			LINK	none available
WBGene00013375	srsx-25	Y62E10A.4a	51	46	36	21	13	17	35	48	32	79	37	53	-1.14474	0.0210627			LINK	none available
WBGene00011117	R07E5.11	R07E5.11	1457	1266	1139	496	358	626	700	589	682	696	550	693	-1.14567	9.77286e-06			LINK	none available
WBGene00012013	ugt-54	T25B9.7	160	167	160	70	55	62	105	94	72	132	85	120	-1.14624	7.44892e-06			LINK	none available
WBGene00017490	F15E11.1	F15E11.1	31362	51039	45578	15206	10161	23743	28702	25245	28297	57199	48412	56302	-1.14637	0.00219436			LINK	F15E11.1, along with F15E11.14, encodes a 17.4 kDa protein (CE16999) with unknown function that is seven-fold more abundant in glp-1 mutant hermaphrodites (which lack a germline) than in normal hermaphrodites; in addition, the protein products of F15E11.1/F15E11.14 are more abundant in daf-2 mutant vs. wild-type adults during a temperature shift from 15 to 25 degrees C; F15E11.1(RNAi) animals hav…
WBGene00017436	F13H8.3	F13H8.3	1925	2066	1989	790	549	958	1402	1293	1599	2395	1854	2295	-1.14655	3.28513e-06			LINK	none available
WBGene00006642	tsp-16	F01E11.4	94	69	72	28	29	33	44	30	30	85	79	76	-1.14668	0.00280121			LINK	none available
WBGene00017659	F21C10.10	F21C10.10	1501	985	877	464	330	493	795	838	863	407	293	331	-1.14688	8.36248e-05	-1.65804	9.6344e-71	LINK	none available
WBGene00007667	fbxa-97	C18B12.5	140	68	87	33	30	50	37	33	36	178	129	181	-1.14777	0.0188694	1.81948	5.67862e-15	LINK	none available
WBGene00013702	Y106G6D.6	Y106G6D.6	284	328	341	108	101	156	225	227	263	323	313	377	-1.14949	5.68302e-05			LINK	none available
WBGene00009433	F35E12.9	F35E12.9a	426	505	554	195	127	249	206	149	184	530	401	513	-1.14996	0.000376455	1.04282	8.47846e-17	LINK	none available
WBGene00077453	Y62F5A.12	Y62F5A.12	2655	1790	1596	729	624	948	1492	1310	1436	1317	1024	1162	-1.15046	5.33245e-05			LINK	none available
WBGene00016404	mutd-1	C34D4.13	2236	1720	1538	683	507	906	1308	1119	1264	1868	1764	2135	-1.15046	5.56853e-05			LINK	none available
WBGene00044236	C17E4.11	C17E4.11	741	630	624	269	175	320	401	397	470	613	802	922	-1.15069	3.72339e-05			LINK	none available
WBGene00011509	T05H10.4	T05H10.4a	4104	2587	2501	1206	1056	1245	2119	2016	2248	2987	2481	2880	-1.15103	4.69201e-06			LINK	none available
WBGene00014884	Y39E4B.14	Y39E4B.14	41	50	40	19	14	17	31	24	35	81	51	67	-1.15145	0.0163053			LINK	none available
WBGene00235267			58	62	58	24	17	27	42	47	39	65	71	75	-1.15268	0.00652696			LINK
WBGene00009785	F46C5.10	F46C5.10	245	171	146	75	50	89	54	53	66	50	27	42	-1.15313	0.00171313			LINK	none available
WBGene00008377	D1054.10	D1054.10	29512	25704	22969	10613	7890	11318	20800	20084	21980	18346	15898	18137	-1.15334	2.26473e-09			LINK	none available
WBGene00044725	R11G1.7	R11G1.7	75	43	65	17	18	35	49	35	43	35	6	13	-1.15334	0.0418704	-1.64901	0.000306017	LINK	none available
WBGene00010928	clec-258	M162.2	199	397	425	137	115	140	26	18	24	23	19	27	-1.15369	0.00262773			LINK	none available
WBGene00009137	bath-39	F25H9.4	315	240	206	90	79	120	98	116	128	220	200	242	-1.1546	0.00016549			LINK	none available
WBGene00016764	C49A9.10	C49A9.10	904	844	776	316	211	435	395	359	419	795	698	757	-1.15466	0.000152723			LINK	none available
WBGene00007649	C17G1.2	C17G1.2	2831	1918	1954	906	562	1091	1086	1004	1233	3408	2769	3152	-1.15474	0.000278792	1.11355	5.20449e-91	LINK	none available
WBGene00012592	Y38E10A.14	Y38E10A.14	498	1019	961	325	255	367	254	230	288	499	357	400	-1.15631	0.00111956			LINK	Y38E10A.14 encodes a novel protein.
WBGene00020026	R12C12.6	R12C12.6a	3142	2284	2128	948	696	1225	1975	1821	2057	2871	2258	2709	-1.158	5.27563e-05			LINK	none available
WBGene00007014	mdt-10	T09A5.6	1796	1403	1277	533	361	803	963	956	999	2107	1770	2093	-1.15988	0.000696613			LINK	none available
WBGene00012807	Y43F4B.10	Y43F4B.10	2610	2051	1866	791	601	1079	1358	1155	1364	2036	1693	1987	-1.16177	3.63922e-05			LINK	none available
WBGene00018808	F54D10.7	F54D10.7	911	874	728	345	280	326	552	506	515	922	700	861	-1.1629	3.96061e-13			LINK	none available
WBGene00045038	F13G11.3	F13G11.3	5726	4806	4512	2013	1526	2164	2781	2569	2909	1198	1224	1425	-1.16306	2.50289e-09	-1.47209	7.17075e-100	LINK	none available
WBGene00012325	W07A12.8	W07A12.8	72	131	154	58	23	56	48	30	35	51	56	69	-1.16401	0.035299			LINK	none available
WBGene00011773	ttr-53	T14G10.3	4776	3450	3241	1398	1000	1935	3039	2884	3329	5337	4210	5131	-1.16524	0.000168697			LINK	none available
WBGene00015683	C10G8.4	C10G8.4	3332	2244	1864	999	658	1151	1948	1620	1858	2060	2073	2370	-1.16543	0.000230447			LINK	C10G8.4 encodes a putative secreted TIL-domain protease inhibitor paralogous to SWM-1, ISL-1, and the products of 11 other C. elegans genes; C10G8.4 and its relatives are collectively similar to other TIL-domain protease inhibitors from nematodes, insects, and vertebrates; C10G8.4 has no obvious function in mass RNAi assays.
WBGene00017880	F28A12.3	F28A12.3	93	45	48	20	30	20	12	7	14	18	14	9	-1.16586	0.036482			LINK	none available
WBGene00007419	C07E3.9	C07E3.9	867	755	714	290	231	362	381	329	368	320	426	456	-1.16603	5.86837e-07			LINK	none available
WBGene00010132	F55H2.7	F55H2.7	4740	3219	3343	1478	1038	1761	3015	2747	3293	5916	4385	5387	-1.16687	3.39765e-05			LINK	F55H2.7 encodes an unfamiliar protein that is dispensable for viability and gross morphology in mass RNAi screens; it residues in a common operon with clu-1, and thus might act in concert with it.
WBGene00018438	btb-6	F45C12.7	796	619	520	259	229	241	258	260	286	506	352	455	-1.16751	7.84904e-08			LINK	none available
WBGene00013319	ccch-5	Y57G11C.25	275	191	188	69	85	92	144	125	125	199	172	205	-1.1683	0.000156467			LINK	Y57G11C.25 encodes a CCCH tandem zinc finger (TZF) protein; based upon its sequence similarity to C. elegans POS-1, the product of Y57G11C.25 is predicted to function as an RNA-binding protein.
WBGene00020436	T12A2.1	T12A2.1	145	401	401	116	115	128	79	37	67	115	88	89	-1.16889	0.0129586			LINK	none available
WBGene00022885	ZK1248.19	ZK1248.19	815	543	515	232	188	285	382	352	436	645	527	646	-1.17019	6.21044e-05			LINK	none available
WBGene00007458	C08F11.11	C08F11.11	18839	15645	13619	6499	4337	7286	5676	4991	5784	5353	4543	5370	-1.17085	2.44077e-06			LINK	none available
WBGene00016590	C42C1.12	C42C1.12	1515	1109	1123	459	404	547	952	902	1048	793	892	1064	-1.17247	2.554e-07			LINK	none available
WBGene00011805	T16G12.4	T16G12.4	998	753	643	296	267	335	501	503	565	472	349	371	-1.17266	5.54889e-07			LINK	none available
WBGene00001044	dnj-26	Y39C12A.8	1673	1228	1186	492	344	701	1069	962	1168	1839	1447	1748	-1.173	0.000301109			LINK	This gene encodes a protein containing a DnaJ ('J') domain.
WBGene00009179	kbp-3	F26H11.1	3530	3121	2880	1230	840	1513	1567	1278	1542	2072	1703	2038	-1.17503	5.02021e-06			LINK	none available
WBGene00010229	F58A4.6	F58A4.6	807	674	540	245	225	286	617	527	663	292	241	306	-1.17526	1.42724e-07	-1.4824	2.33496e-48	LINK	none available
WBGene00010440	ttr-51	JC8.8	7545	7759	7267	2828	2086	3570	4554	4118	4765	3253	3141	3608	-1.17578	4.9969e-07			LINK	none available
WBGene00010314	F59B2.12	F59B2.12	90	44	35	19	21	23	36	27	24	34	27	40	-1.17586	0.046535			LINK	none available
WBGene00006628	tsp-2	C02F5.11	30	80	56	20	20	22	76	79	77	33	35	30	-1.17809	0.0410738	-1.61524	8.74757e-09	LINK	none available
WBGene00020064	kbp-1	R13F6.1	2954	1766	1809	775	611	1059	1305	1170	1303	1971	1697	2097	-1.17826	0.000293739			LINK	none available
WBGene00013906	ugt-5	ZC455.6a	554	658	658	253	155	295	284	273	345	483	386	423	-1.18081	7.15412e-05			LINK	none available
WBGene00044535	K11D12.13	K11D12.13	2586	2112	1855	877	590	984	1524	1422	1605	1564	1425	1749	-1.18124	3.14566e-06			LINK	none available
WBGene00018543	ugt-32	F47C10.6	116	50	54	25	28	29	8	7	14	41	28	17	-1.18152	0.0295463	1.19843	0.0346502	LINK	none available
WBGene00010965	MTCE.31	MTCE.31	131540	90207	75623	30896	24683	54994	116764	113513	133631	115358	95347	115176	-1.18192	0.00175679			LINK	none available
WBGene00021178	Y9C9A.8	Y9C9A.8	106	142	154	52	34	65	58	44	59	121	86	108	-1.18351	0.00273714			LINK	none available
WBGene00010195	pot-2	F57C2.3	2914	1932	1762	868	633	961	2364	2042	2282	2973	2491	2829	-1.18568	2.21165e-05			LINK	none available
WBGene00021547	Y44E3A.1	Y44E3A.1a	291	197	178	85	58	105	187	173	200	268	203	245	-1.18611	0.00103719			LINK	none available
WBGene00018071	F35H10.6	F35H10.6	2226	1684	1563	635	514	887	1215	1076	1307	694	598	710	-1.18654	2.39473e-05	-1.22028	5.59873e-65	LINK	none available
WBGene00006470	tag-120	F40F9.2	941	979	1022	349	290	460	560	520	619	927	861	963	-1.18664	6.41328e-07			LINK	tag-120 encodes a predicted transmembrane protein; as loss of tag-120 activity via RNAi does not result in any abnormalities, the precise role of TAG-120 in C. elegans development and/or behavior is not yet known; however, TAG-120 is homologous to a Drosophila NMDA receptor-associated protein and mammalian transmembrane proteins that function in Fas-mediated cell death, so TAG-120 may play a role…
WBGene00007808	best-7	C29F4.2	570	759	807	289	198	313	331	318	364	783	627	754	-1.18856	2.42683e-05			LINK	none available
WBGene00000406	cdk-4	F18H3.5a	954	571	517	251	187	320	414	364	416	591	481	548	-1.18878	0.000631654			LINK	cdk-4 encodes two isoforms of a cyclin-dependent serine/threonine protein kinase orthologous to human CDK4 and CDK6 (OMIM:123829 and OMIM:603368, mutated in cutanous malignant melanoma) which complex with D-type cyclins to regulate progression through the G1 phase of the cell cycle; CDK-4 activity is essential for G1 progression in postembryonic blast cells and as a result, cdk-4 mutant animals g…
WBGene00007144	B0334.4	B0334.4	6340	4335	4024	1860	1338	2264	3254	3227	3501	4576	3884	4831	-1.18964	3.41245e-05			LINK	none available
WBGene00017703	F22E5.1	F22E5.1	372	442	490	188	161	138	117	132	137	208	160	201	-1.19261	1.17728e-06			LINK	none available
WBGene00012753	Y41C4A.6	Y41C4A.6	145	94	60	35	35	40	41	57	37	96	96	79	-1.19268	0.00999652			LINK	none available
WBGene00018437	btb-8	F45C12.6	126	88	65	37	35	31	62	47	56	84	66	101	-1.19329	0.0038174			LINK	none available
WBGene00010958	MTCE.4	MTCE.4	54	51	39	13	21	19	355	283	340	44	183	219	-1.19432	0.0155412	-1.46264	0.0493611	LINK	none available
WBGene00019927	fbxc-24	R07C3.11	43	40	33	16	7	20	61	47	78	45	34	49	-1.19463	0.0483631			LINK	none available
WBGene00013726	Y106G6H.16	Y106G6H.16	1009	585	555	259	207	328	558	486	564	660	562	643	-1.19584	0.000403274			LINK	none available
WBGene00018603	F48E3.2	F48E3.2	350	350	370	157	113	128	153	164	180	202	140	165	-1.19651	3.35131e-08			LINK	none available
WBGene00044762	ZK688.11	ZK688.11	1930	1460	1502	582	407	822	1198	1089	1285	2092	1767	2112	-1.19787	0.0001313			LINK	none available
WBGene00013839	fbxa-32	ZC47.6	104	108	113	33	36	51	44	28	53	86	49	58	-1.20037	0.000650192			LINK	This gene encodes a protein containing an F-box, a motif predicted to mediate protein-protein interactions either with homologs of yeast Skp-1p or with other proteins; this gene's encoded protein also contains an FTH/DUF38 motif, which may also mediate protein-protein interaction.
WBGene00007521	C11E4.7	C11E4.7a	227	491	418	145	113	162	127	118	148	270	214	257	-1.20075	0.00139099			LINK	none available
WBGene00011231	R11A5.3	R11A5.3	194	149	92	51	54	54	92	75	77	74	49	71	-1.20162	0.00157227			LINK	none available
WBGene00010224	F58A3.4	F58A3.4	31	47	31	13	10	17	14	17	11	16	6	20	-1.20217	0.0364546			LINK	none available
WBGene00007531	C11H1.7	C11H1.7	77	52	55	27	20	21	33	46	40	66	66	72	-1.20221	0.00681371			LINK	none available
WBGene00007112	B0035.13	B0035.13	2491	3220	3181	1052	832	1401	6133	5386	6221	3850	3650	4458	-1.20291	5.51589e-06			LINK	none available
WBGene00009009	F21D5.4	F21D5.4	405	331	266	118	75	175	185	205	193	355	303	377	-1.20331	0.00160475			LINK	none available
WBGene00018112	F36H9.4	F36H9.4	349	439	399	151	102	185	201	169	170	182	190	218	-1.20356	3.6718e-05			LINK	F36H9.4 encodes a putative secreted TIL-domain protease inhibitor paralogous to SWM-1, ISL-1, and the products of 11 other C. elegans genes; F36H9.4 and its relatives are collectively similar to other TIL-domain protease inhibitors from nematodes, insects, and vertebrates; F36H9.4 has no obvious function in mass RNAi assays.
WBGene00235094			141	108	87	33	32	58	316	179	209	158	141	242	-1.20397	0.0047728			LINK
WBGene00017289	F09E5.11	F09E5.11	3812	2755	2810	1112	790	1553	2880	2563	3077	3359	3726	4788	-1.204	9.9489e-05			LINK	F09E5.11 encodes a divergent ortholog of S. cerevisiae VPH2/VMA12; like VPH2, F09E5.11 may be required for vacuolar proton-translocating ATPase (V-ATPase) assembly in the endoplasmic reticulum.
WBGene00018422	F44E2.9	F44E2.9	1108	736	702	313	222	401	555	531	601	629	609	747	-1.20531	0.000163177			LINK	none available
WBGene00044554	F41E6.15	F41E6.15	309	412	390	114	100	194	202	158	167	205	182	273	-1.20764	0.000547287			LINK	none available
WBGene00009219	dpm-3	F28D1.11	2179	1468	1387	620	412	815	1471	1184	1393	1413	1374	1626	-1.20845	0.000249649			LINK	dpm-3 encodes a putative regulatory subunit of dolichol phosphate mannosyltransferase, orthologous to human DPM3 (OMIM:605951); in mass RNAi assays, DPM-3 is required for normal body size, fertility, and health.
WBGene00009745	F45H11.5	F45H11.5	1063	889	853	354	250	424	453	401	492	872	730	938	-1.21226	1.79277e-06			LINK	none available
WBGene00019952	fbxb-74	R08C7.9	43	36	26	8	16	14	20	19	26	15	10	16	-1.21464	0.0479528	-1.04595	0.0417792	LINK	This gene encodes a protein containing an F-box, a motif predicted to mediate protein-protein interactions either with homologs of yeast Skp-1p or with other proteins; its encoded protein also contains a Pfam-B45 motif of presently unknown function.
WBGene00013779	Y116A8B.1	Y116A8B.1	69	62	47	27	15	23	19	8	11	17	22	9	-1.21509	0.00763807			LINK	none available
WBGene00021818	Y53G8B.2	Y53G8B.2	602	601	551	244	176	222	360	374	419	502	376	441	-1.21522	2.15298e-11			LINK	none available
WBGene00017358	F10E9.7	F10E9.7	3260	2163	2056	925	674	1131	1922	1746	2185	2898	2336	2921	-1.21562	3.34425e-05			LINK	none available
WBGene00206482	B0416.10	B0416.10	86	73	51	19	25	32	58	52	49	43	30	40	-1.21642	0.0077702			LINK	none available
WBGene00017017	D1014.4	D1014.4	2497	1970	1790	752	542	983	1305	1172	1412	2547	1967	2272	-1.21961	1.26048e-05			LINK	none available
WBGene00004354	rgs-11	F45B8.1	892	673	593	276	192	317	341	312	370	444	335	421	-1.22035	1.2063e-05			LINK	none available
WBGene00011774	ttr-54	T14G10.4	343	271	248	92	76	145	171	161	182	314	282	387	-1.22059	0.000347742			LINK	none available
WBGene00019622	K10C2.7	K10C2.7	140	158	156	41	47	77	56	57	56	47	53	65	-1.22061	0.000917295			LINK	none available
WBGene00000298	cat-4	F32G8.6	4861	4627	4390	1848	1319	1896	2222	1946	2121	2072	1564	1813	-1.22064	3.0525e-11			LINK	cat-4 encodes an ortholog of the human GTP cyclohydrolase I gene (GCH1; OMIM:600225), which when mutated leads to dystonia; CAT-4 is involved in serotonin and dopamine biosynthesis that affects movement, mating behavior, foraging behavior, and cell migration; CAT-4 acts in the same genetic pathway as flp-1.
WBGene00009247	bath-45	F29C12.5	72	49	42	17	16	26	30	34	36	84	49	62	-1.22257	0.0174199			LINK	none available
WBGene00010963	MTCE.25	MTCE.25	46230	37997	36515	12659	10359	20791	50599	53646	62632	50873	50762	57383	-1.22286	7.88206e-05			LINK	MTCE.25 encodes the C. elegans homolog of the core ND4 subunit of mitochondrial NADH:ubiquinone oxidoreductase (Complex I).
WBGene00044468	Y69A2AL.2	Y69A2AL.2	601	1186	1111	362	299	396	969	840	1029	423	293	351	-1.22289	0.000218029	-1.79095	3.19835e-91	LINK	none available
WBGene00023492	T24D3.2	T24D3.2	192	204	172	68	63	75	73	78	69	46	28	41	-1.2233	3.35781e-07	-1.32613	2.10206e-06	LINK	none available
WBGene00007950	C35A5.6	C35A5.6a	401	320	313	123	75	178	202	186	207	418	336	390	-1.22343	0.00102434			LINK	none available
WBGene00010960	MTCE.12	MTCE.12	93510	72016	57998	24119	18422	38249	85889	80630	96372	61562	88196	103924	-1.2238	0.000254971			LINK	none available
WBGene00002086	ins-3	ZK75.3	62	52	30	20	9	23	28	18	11	30	14	15	-1.22451	0.0456315			LINK	ins-3 encodes one of several insulin-related peptides; INS-3 is classified as a Type-beta insulin based on the predicted arrangement of disulfide bonds; gfp gene fusions with the promoter and enhancer regions indicate that INS-3 is expressed in some amphid sensory neurons.
WBGene00010966	MTCE.34	MTCE.34	17786	13441	10962	4178	3610	7432	18975	17368	22803	10666	13582	14665	-1.22477	0.000449724			LINK	none available
WBGene00010553	K04C1.3	K04C1.3	449	284	261	125	92	143	270	215	277	226	168	185	-1.22601	0.000232231			LINK	none available
WBGene00011222	R10H10.3	R10H10.3	3745	4892	4970	1588	1184	2176	2866	2777	3313	3314	2572	3061	-1.22713	2.41434e-05			LINK	none available
WBGene00195239	ZK1127.13	ZK1127.13	2809	2042	1757	794	506	1089	2076	1684	1940	2809	2632	3050	-1.22773	0.00033123			LINK	none available
WBGene00045516	F43D2.7	F43D2.7	75	83	72	25	23	35	30	31	28	67	47	62	-1.23053	0.00139374			LINK	none available
WBGene00194651	C33D9.13	C33D9.13	446	251	258	103	94	147	87	77	80	531	362	502	-1.23235	0.000802955	2.12941	9.71036e-46	LINK	none available
WBGene00008566	F08A8.3	F08A8.3	449	863	858	275	253	259	138	154	135	97	100	90	-1.23263	0.000160896			LINK	none available
WBGene00021392	Y38A10A.7	Y38A10A.7	3744	2704	2604	1078	797	1391	1656	1498	1816	3044	2587	3126	-1.23285	1.09786e-05			LINK	none available
WBGene00007758	C27A7.8	C27A7.8a	60	46	47	12	18	25	29	27	48	28	23	35	-1.2333	0.0180517			LINK	none available
WBGene00010007	F53H4.2	F53H4.2	4645	5630	5423	1859	1290	2525	3485	3260	3950	5204	4040	4848	-1.2343	1.7922e-05			LINK	none available
WBGene00021772	math-45	Y51H7BM.1	65	44	57	20	23	17	31	23	17	34	30	30	-1.2351	0.00871957			LINK	none available
WBGene00044371	ZC239.20	ZC239.20	81	54	46	24	27	14	25	23	24	31	25	27	-1.23543	0.0167457			LINK	none available
WBGene00008691	mff-1	F11C1.2	525	341	351	148	128	162	250	218	239	269	217	275	-1.23693	7.95976e-06			LINK	none available
WBGene00013659	Y105C5B.20	Y105C5B.20	344	231	207	94	59	128	151	129	155	435	393	428	-1.23721	0.00173011	1.15755	9.18724e-19	LINK	none available
WBGene00010124	F55G11.4	F55G11.4	609	758	660	243	266	218	581	534	638	303	240	349	-1.23998	3.27088e-11	-1.35369	7.89307e-38	LINK	none available
WBGene00017134	EEED8.3	EEED8.3	11775	7362	6589	2985	2230	3988	7463	6659	7824	11119	10057	12360	-1.24169	0.000139925			LINK	EEED8.3 encodes a protein with similarity to fatty acid-binding proteins; loss of EEED8.3 activity via RNAi results in 20-30% embryonic lethality.
WBGene00017667	ttr-37	F21E9.3	225	110	102	67	34	56	50	49	58	23	24	26	-1.24177	0.0113344	-1.47567	9.79468e-06	LINK	none available
WBGene00011872	blos-1	T20G5.10	1557	1142	1075	442	330	580	861	813	873	1059	828	1001	-1.24237	1.51905e-05			LINK	none available
WBGene00017601	ets-7	F19F10.5	39	31	44	12	16	13	16	13	8	50	42	49	-1.24406	0.025289	1.54847	0.000308306	LINK	none available
WBGene00012122	T28C6.8	T28C6.8	603	803	774	257	229	296	385	335	409	628	477	590	-1.24434	2.53418e-08			LINK	none available
WBGene00010740	K10D3.6	K10D3.6	52	77	81	20	17	38	35	29	22	36	37	42	-1.25148	0.0188675			LINK	none available
WBGene00010064	F54F7.2	F54F7.2	789	819	730	274	216	341	446	445	500	661	457	615	-1.25437	1.38284e-08			LINK	none available
WBGene00015950	C18A11.4	C18A11.4	56	53	41	14	19	20	16	12	23	41	38	59	-1.25503	0.0077702	1.06603	0.0109486	LINK	none available
WBGene00016027	C23H5.8	C23H5.8a	6211	4285	4010	1732	1406	2010	888	821	871	1371	1270	1533	-1.25535	4.03911e-07			LINK	none available
WBGene00008427	atg-10	D2085.2	112	107	91	38	22	50	64	51	59	104	97	107	-1.25684	0.00220306			LINK	none available
WBGene00011189	R10D12.8	R10D12.8	495	337	378	142	107	181	240	211	223	704	491	652	-1.25837	4.46905e-05	1.06992	7.1422e-22	LINK	none available
WBGene00013297	Y57G11B.5	Y57G11B.5	10237	9287	8333	3452	2525	3845	4495	3947	4620	1553	1513	1820	-1.26696	2.97274e-10	-1.78948	4.67283e-184	LINK	none available
WBGene00017854	F27C1.4	F27C1.4	90	133	99	38	38	37	76	53	84	85	49	78	-1.26878	0.000182315			LINK	none available
WBGene00015180	B0416.4	B0416.4	636	465	442	196	131	216	306	262	335	216	192	189	-1.27061	8.75317e-06			LINK	none available
WBGene00010555	K04C1.5	K04C1.5	3267	2785	2649	1070	810	1182	2691	2551	2706	1425	1292	1460	-1.27066	1.67591e-10	-1.30324	5.1864e-123	LINK	none available
WBGene00010808	sepa-1	M01E5.6	482	418	344	153	154	129	219	200	218	301	220	263	-1.27099	3.46023e-09			LINK	sepa-1 encodes a self associating adaptor protein of 702 amino acids rich in helical structures at its N-terminus and a protein interaction KIX domain at the C-terminus; SEPA-1 is required for degradation of germline P granule components PGL-1 and PGL-3 in somatic cells by the autophagic machinery; sepa-1 forms protein aggregates and is preferentially removed by autophagy during embryogenesis; SE…
WBGene00017131	E04F6.15	E04F6.15	466	737	670	198	142	319	384	397	442	333	245	258	-1.27111	0.000875985			LINK	none available
WBGene00015746	C13F10.7	C13F10.7	6667	5504	5326	2115	1560	2476	4783	4664	5150	7054	5593	6701	-1.27232	1.46758e-08			LINK	none available
WBGene00017127	E04F6.8	E04F6.8	2294	1437	1235	586	376	776	1007	926	1042	1303	1688	2054	-1.27378	0.000485633			LINK	none available
WBGene00017422	F13C5.1	F13C5.1	261	217	171	65	77	84	135	122	180	197	180	150	-1.27581	9.27912e-06			LINK	F13C5.1 encodes a novel protein with two predicted transmembrane domains; the protein product of F13C5.1 is most closely related to proteins from other nematode species and does not appear to have close homologs in more distantly related organisms.
WBGene00008494	F01D5.3	F01D5.3	235	682	600	160	125	247	737	708	778	307	309	405	-1.27705	0.0106555	-1.49637	1.52226e-46	LINK	none available
WBGene00017541	F17E9.4	F17E9.4	3716	3473	3435	1175	728	1806	2326	2107	2376	3725	3274	3766	-1.28328	0.000232572			LINK	none available
WBGene00004821	skr-15	F54D10.1	270	243	207	76	82	92	114	113	103	80	63	68	-1.28374	9.75835e-08	-1.02651	2.31293e-06	LINK	The skr-15 gene encodes a homolog of Skp1 in S. cerevisiae that has no known function in vivo, since skr-15(RNAi) animals are at least superficially normal.
WBGene00014454	MTCE.7	MTCE.7	2043	1066	1131	555	295	631	1609	1677	1753	1706	1452	1484	-1.28378	0.00129444			LINK	none available
WBGene00001433	fkb-8	Y18D10A.25	162	265	200	73	50	95	53	30	33	66	75	78	-1.28433	0.000447805			LINK	fkb-8 encodes a predicted FKBP-type peptidylprolyl isomerase.
WBGene00021966	Y57G7A.2	Y57G7A.2	61	34	47	26	13	11	28	26	30	51	46	47	-1.28458	0.0343705			LINK	none available
WBGene00009069	F23A7.4	F23A7.4	2203	1997	1305	556	528	815	2701	1973	2384	444	1699	2047	-1.28501	6.35125e-06			LINK	none available
WBGene00016886	fbxb-96	C52E2.7	41	27	24	13	9	10	17	32	21	13	14	17	-1.286	0.0400418	-1.05409	0.0408931	LINK	none available
WBGene00045292	fbxa-179	T14C1.3	82	45	56	26	11	27	29	29	32	34	23	30	-1.2874	0.0239814			LINK	none available
WBGene00044680	F30A10.13	F30A10.13a	235	176	195	80	48	83	130	87	97	137	120	139	-1.29129	8.11377e-05			LINK	none available
WBGene00016623	psmd-9	C44B7.1	3469	2430	2349	989	663	1204	2279	2018	2432	2960	2448	3076	-1.29349	1.06958e-05			LINK	none available
WBGene00007589	C14C10.6	C14C10.6	922	598	594	223	136	372	586	527	647	1031	823	958	-1.29367	0.0024351			LINK	none available
WBGene00011925	T22C8.4	T22C8.4	136	73	69	33	24	39	46	62	62	20	24	24	-1.29413	0.00683289	-1.69343	6.3557e-07	LINK	none available
WBGene00017091	ttr-40	E02C12.4	180	163	151	67	39	65	55	52	54	83	78	105	-1.29648	3.49122e-05			LINK	none available
WBGene00194747	H05C05.4	H05C05.4	77	59	44	25	14	23	40	21	31	27	32	42	-1.29787	0.00780658			LINK	none available
WBGene00017481	F15B10.3	F15B10.3	363	196	176	96	69	88	184	153	201	87	60	84	-1.29938	0.000740126	-1.59895	3.51781e-18	LINK	none available
WBGene00022262	Y73C8C.3	Y73C8C.3	104	58	67	29	24	26	37	31	27	92	72	89	-1.30086	0.00354943	1.03128	0.000405061	LINK	none available
WBGene00009588	F40F11.3	F40F11.3a	3934	2744	2466	970	686	1483	1802	1682	2065	3540	2937	3592	-1.3015	0.000194585			LINK	none available
WBGene00012747	Y40H7A.10	Y40H7A.10	2761	3298	3023	1030	657	1441	1943	1660	1940	2957	2171	2682	-1.30271	3.51821e-05			LINK	none available
WBGene00015569	C07D10.5	C07D10.5	579	442	423	150	168	177	294	321	370	491	356	499	-1.30347	1.04503e-08			LINK	none available
WBGene00011065	R06C7.6	R06C7.6	210	160	167	71	43	71	145	135	150	167	133	145	-1.30508	5.95969e-05			LINK	none available
WBGene00021491	comt-4	Y40B10A.6	72	67	65	25	22	23	41	56	64	35	21	29	-1.30695	0.000613638	-1.30838	9.87431e-05	LINK	none available
WBGene00016003	C18H9.5	C18H9.5	128	90	92	28	34	44	15	13	22	73	54	63	-1.30696	0.000782331	1.55025	2.01174e-05	LINK	none available
WBGene00206388	K10C2.14	K10C2.14	60	49	76	24	15	25	22	17	18	30	31	26	-1.30953	0.00761263			LINK	none available
WBGene00020433	T11F8.1	T11F8.1	2022	1246	1261	499	338	712	1250	1172	1261	2210	1924	2139	-1.31009	0.000265701			LINK	none available
WBGene00206380	C42D4.18	C42D4.18	181	127	105	36	39	65	60	55	67	142	92	118	-1.31385	0.00169685			LINK	none available
WBGene00020665	T22B2.1	T22B2.1	257	169	146	79	58	58	54	73	77	197	147	192	-1.31462	0.000135936	1.01039	6.86722e-07	LINK	none available
WBGene00017041	D2007.1	D2007.1	501	541	470	166	135	214	336	327	363	159	155	164	-1.31481	1.87918e-08	-1.47484	1.95462e-29	LINK	none available
WBGene00015587	sdz-2	C08A9.7	90	72	59	22	22	31	40	23	31	63	45	66	-1.31549	0.00169271			LINK	none available
WBGene00019814	R02C2.1	R02C2.1	89	53	50	18	29	18	18	17	21	21	21	19	-1.3169	0.0109678			LINK	none available
WBGene00007341	C05D12.4	C05D12.4	109	91	84	42	20	35	34	31	35	30	41	30	-1.31749	0.00111052			LINK	none available
WBGene00019619	K10C2.3	K10C2.3	1980	4320	2906	1207	1104	811	1436	1329	1425	250	213	250	-1.31855	6.22374e-05	-2.93269	2.63541e-271	LINK	none available
WBGene00044661	fbxa-143	F44G3.14	88	112	143	51	32	35	50	58	59	93	32	66	-1.3189	0.00119415			LINK	none available
WBGene00045261	H29C22.1	H29C22.1	2016	1686	1688	600	417	818	1652	1365	1696	2252	1693	2075	-1.31908	4.87364e-06			LINK	none available
WBGene00017658	F21C10.9	F21C10.9	2863	1955	1981	839	626	849	188	148	191	508	410	509	-1.31978	2.55922e-08	1.06088	3.8696e-18	LINK	none available
WBGene00010123	F55G11.2	F55G11.2	377	662	698	223	216	155	212	193	199	85	82	75	-1.31985	0.000113502	-1.69269	7.13004e-22	LINK	none available
WBGene00008199	C49C3.9	C49C3.9	538	1061	1005	306	264	318	403	391	447	696	492	559	-1.32011	5.0607e-05			LINK	none available
WBGene00044614	C36B1.14	C36B1.14	2137	1444	1417	569	357	770	1239	983	1268	1347	1222	1470	-1.32249	0.000127858			LINK	none available
WBGene00007509	C10C5.5	C10C5.5	329	708	661	203	134	241	335	269	331	788	574	663	-1.32449	0.00102323			LINK	none available
WBGene00015963	C18B10.6	C18B10.6	58	60	48	16	15	25	50	47	71	73	51	72	-1.32494	0.00419378			LINK	none available
WBGene00011892	T21C9.4	T21C9.4	4877	3216	2865	1146	970	1577	1852	1644	1926	1339	1082	1412	-1.32655	9.04808e-06			LINK	none available
WBGene00185055	Y47D3B.12	Y47D3B.12	82	74	91	32	23	29	45	45	65	26	30	29	-1.32761	0.000488045	-1.22978	0.000264035	LINK	none available
WBGene00006726	ubl-5	F46F11.4	1589	1185	1106	395	296	617	1209	973	1031	1400	1318	1550	-1.32857	6.86185e-05			LINK	ubl-5 encodes a ubiquitin-like protein orthologous to human ubiquitin-like protein UBL5; UBL-5 activity is required for normal mitochondrial morphology as well as for assembly of mitochondrial multi-protein complexes; in addition, UBL-5 is essential for the mitochondrial unfolded protein response (UPRmt); in adult animals, ubl-5 is expressed at low levels in most tissues, with slightly higher lev…
WBGene00009965	frpr-9	F53B7.2a	60	38	38	18	11	17	9	6	10	42	28	32	-1.32875	0.0139365	1.64937	0.00124966	LINK	F53B7.2 encodes a homolog of the functionally active Fmrf Receptor (FR; CG2114) of D. melanogaster; it is thus possible that F53B7.2 is a receptor for one of the FMRF-like neurotransmitters in C. elegans (e.g., FLP-1 through FLP-12).
WBGene00044607	K02A11.4	K02A11.4	302	427	391	128	69	182	303	245	351	223	252	299	-1.33014	0.00103719			LINK	none available
WBGene00008844	F15A4.10	F15A4.10	643	506	402	159	168	193	243	218	273	229	159	217	-1.33112	7.8143e-08			LINK	none available
WBGene00008588	F08G12.5	F08G12.5	163	134	123	45	43	53	91	64	61	125	90	111	-1.33494	8.87095e-06			LINK	none available
WBGene00019700	btb-11	M01D1.3	143	88	97	30	34	46	96	113	104	100	65	116	-1.3363	0.00105797			LINK	none available
WBGene00011049	sdz-26	R06A4.6	82	52	63	17	28	21	20	32	27	31	15	14	-1.33819	0.00497172			LINK	none available
WBGene00013522	Y73F8A.13	Y73F8A.13a	331	251	242	69	79	126	139	108	138	208	203	228	-1.34522	9.35048e-05			LINK	none available
WBGene00019703	fbxb-41	M01D1.8	53	73	42	27	9	20	37	25	34	16	25	32	-1.34619	0.018156			LINK	This gene encodes a protein containing an F-box, a motif predicted to mediate protein-protein interactions either with homologs of yeast Skp-1p or with other proteins; its encoded protein also contains a Pfam-B45 motif of presently unknown function.
WBGene00010961	MTCE.16	MTCE.16	20958	14931	16096	5193	3710	8426	11230	12194	14927	10574	13178	13581	-1.3487	0.000107981			LINK	MTCE.16 encodes the C. elegans homolog of the core ND2 subunit of mitochondrial NADH:ubiquinone oxidoreductase (Complex I); the sequence of C. elegans ND2, like other bilaterian ND2 sequences, is truncated at its N-terminus when compared to other organisms.
WBGene00017140	EEED8.12	EEED8.12	265	123	143	46	69	61	123	106	103	104	75	60	-1.34925	0.00229115			LINK	none available
WBGene00189951	linc-29	Y73B6BL.269a	101	123	104	34	32	43	53	37	43	70	56	57	-1.34949	3.82494e-05			LINK	none available
WBGene00012221	W03C9.5	W03C9.5	2878	1935	1903	679	639	897	2080	1817	2075	2300	2276	2608	-1.35979	1.56965e-07			LINK	none available
WBGene00017439	F13H8.6	F13H8.6	38	23	27	7	10	12	16	23	10	28	24	27	-1.36165	0.0391963			LINK	none available
WBGene00006650	tts-1	F09E10.11a	5311	1619	1691	988	814	1033	1499	1264	1440	3461	2640	3014	-1.36176	0.00616325			LINK	none available
WBGene00044488	Y54G2A.45	Y54G2A.45	312	993	864	249	249	217	222	228	244	128	124	160	-1.36715	0.00271388	-1.12783	4.77379e-13	LINK	none available
WBGene00008283	C53D6.6	C53D6.6	778	492	466	175	143	250	282	333	332	835	654	753	-1.37079	5.08371e-05			LINK	none available
WBGene00271824			37	28	35	14	10	9	24	21	21	16	8	26	-1.37104	0.019245			LINK
WBGene00020594	ugt-10	T19H12.11	29	33	41	14	14	6	21	20	17	23	16	19	-1.37228	0.0318935			LINK	none available
WBGene00018561	gadr-3	F47D12.5	234	124	126	48	47	63	109	115	122	238	220	232	-1.37361	0.000770136			LINK	none available
WBGene00017593	F19C7.3	F19C7.3	79	56	55	19	17	26	25	24	19	51	51	50	-1.37649	0.00245407			LINK	none available
WBGene00011635	T09A5.7	T09A5.7	2741	2148	1891	702	433	1071	823	790	969	1505	1232	1437	-1.38025	0.000146035			LINK	none available
WBGene00007850	C31G12.1	C31G12.1	342	240	226	73	66	123	155	152	144	234	209	264	-1.38265	0.000162904			LINK	none available
WBGene00185005	T03F6.10	T03F6.10	153	196	196	59	40	78	63	47	53	104	94	131	-1.38999	9.22827e-05			LINK	none available
WBGene00012432	Y11D7A.8	Y11D7A.8	40	27	20	9	9	10	9	8	9	32	19	20	-1.39024	0.035135			LINK	none available
WBGene00013335	Y57G11C.46	Y57G11C.46	80	72	65	22	19	29	43	50	50	45	29	43	-1.39296	0.00049513			LINK	none available
WBGene00017143	EEED8.15	EEED8.15	526	360	333	120	120	152	542	547	605	513	385	529	-1.3947	6.96391e-07			LINK	none available
WBGene00018104	fbxb-53	F36H5.5a	52	35	29	7	17	13	15	20	18	9	15	19	-1.39668	0.0295433			LINK	This gene encodes a protein containing an F-box, a motif predicted to mediate protein-protein interactions either with homologs of yeast Skp-1p or with other proteins; its encoded protein also contains a Pfam-B45 motif of presently unknown function.
WBGene00008563	F07H5.13	F07H5.13	374	231	200	74	52	132	209	269	261	347	259	321	-1.39777	0.00250096			LINK	none available
WBGene00021542	Y43B11AL.1	Y43B11AL.1	83	44	54	13	18	27	30	21	35	59	31	44	-1.40089	0.012344			LINK	none available
WBGene00020917	W01B11.6	W01B11.6a	1021	650	584	228	200	293	149	152	139	188	148	191	-1.40271	3.81949e-06			LINK	none available
WBGene00206469	F58D2.5	F58D2.5	35	38	21	13	9	8	4	10	8	15	4	13	-1.40283	0.0259859			LINK	none available
WBGene00044773	C08A9.10	C08A9.10	1498	1225	1103	459	270	499	531	474	477	602	550	668	-1.40423	5.85923e-07			LINK	none available
WBGene00005061	sra-35	B0304.8	32	30	23	5	8	14	20	25	13	30	21	15	-1.4054	0.0448566			LINK	none available
WBGene00009426	F35E12.2	F35E12.2a	29	44	34	6	11	17	5	10	5	27	25	28	-1.40576	0.0318324	1.61582	0.00578083	LINK	none available
WBGene00009437	F35G2.3	F35G2.3	32	36	29	10	6	15	24	23	28	39	35	37	-1.40607	0.0249581			LINK	none available
WBGene00044588	ZK1236.9	ZK1236.9	81	72	72	21	18	33	41	28	41	83	68	74	-1.40625	0.000935678			LINK	ZK1236.9 encodes a protein with no obvious non-nematode homologs; either ZK1236.9, or ZK1236.5, or both proteins weakly inhibit DHC-1 in vivo; likewise, either ZK1236.9, or ZK1236.5, or both proteins are required in mass RNAi assays for normal osmoregulation and normally rapid growth.
WBGene00008485	ugt-43	F01D4.1a	154	80	82	38	26	37	60	43	26	104	93	99	-1.40902	0.00189861			LINK	none available
WBGene00235391			156	148	141	49	39	54	118	119	114	153	92	123	-1.41154	5.86811e-07			LINK
WBGene00018203	F39F10.3	F39F10.3	303	251	205	81	91	69	126	117	138	138	104	119	-1.41188	1.50235e-07			LINK	none available
WBGene00010660	K08D8.6	K08D8.6	2459	3151	3080	989	827	962	1842	1779	1914	2033	1696	1914	-1.41269	1.85453e-15			LINK	none available
WBGene00045268	ttr-42	H01M10.3	2550	2165	2065	747	474	940	1646	1361	1804	2333	2026	2573	-1.41434	6.80618e-07			LINK	none available
WBGene00045043	Y116A8C.48	Y116A8C.48	35	27	32	10	5	15	25	20	15	21	26	15	-1.41652	0.0356712			LINK	none available
WBGene00304815			1368	1361	989	420	211	547	1862	1279	1560	344	984	1104	-1.41768	0.000120747	-1.2831	0.0331587	LINK
WBGene00044694	fbxb-90	F12E12.10	61	41	52	15	13	21	35	33	42	29	14	21	-1.41893	0.00512807	-1.17065	0.00321534	LINK	none available
WBGene00008486	ugt-44	F01D4.2	1975	1573	1423	560	438	577	1817	1671	1836	1076	782	1000	-1.42027	8.26543e-13	-1.27916	2.37826e-96	LINK	none available
WBGene00010689	K08H2.2	K08H2.2	99	51	50	18	19	26	24	33	43	61	57	42	-1.4234	0.00709228			LINK	none available
WBGene00007153	clec-41	B0365.6	3836	9989	10034	2573	2329	2686	4979	4798	5310	6676	4876	5637	-1.42381	0.000330909			LINK	none available
WBGene00194674	F23D12.11	F23D12.11	5319	4594	4335	1210	1078	2198	2463	2072	2516	3709	3343	4240	-1.42585	9.36591e-06			LINK	none available
WBGene00017756	F23F12.12	F23F12.12	536	207	196	91	74	129	31	36	34	25	91	113	-1.43056	0.00487409			LINK	none available
WBGene00017390	F12A10.1	F12A10.1	258	92	91	49	26	63	114	76	116	66	73	87	-1.43608	0.0193678			LINK	none available
WBGene00009512	F37H8.3	F37H8.3a	422	549	506	141	116	206	143	110	99	230	180	220	-1.43657	1.04894e-06			LINK	none available
WBGene00015905	C17E7.12	C17E7.12	1025	732	619	242	188	311	648	499	557	750	666	799	-1.43903	1.14746e-06			LINK	none available
WBGene00019660	K11H12.4	K11H12.4	148	466	423	111	110	104	78	78	68	132	73	114	-1.44126	0.00262897			LINK	none available
WBGene00021719	fbxb-104	Y49F6B.7	33	24	29	11	4	12	35	11	26	50	22	32	-1.44373	0.0398494			LINK	none available
WBGene00017249	fbxb-108	F08D12.6	23	38	26	9	9	9	14	12	28	16	16	21	-1.44451	0.0225558			LINK	This gene encodes a protein containing an F-box, a motif predicted to mediate protein-protein interactions either with homologs of yeast Skp-1p or with other proteins; its encoded protein also contains a Pfam-B45 motif of presently unknown function.
WBGene00015610	C08F1.6	C08F1.6	133	119	94	30	40	37	73	58	76	85	73	61	-1.44752	1.90698e-05			LINK	none available
WBGene00020438	T12A2.3	T12A2.3	88	52	47	22	16	20	24	14	24	20	11	24	-1.45003	0.00350908			LINK	none available
WBGene00011957	T23F11.6	T23F11.6	86	72	84	18	19	38	35	39	54	64	68	69	-1.45348	0.00222471			LINK	none available
WBGene00010000	F53F8.3	F53F8.3	3124	2119	1864	786	659	752	1962	1708	1955	960	797	920	-1.4536	5.64717e-10	-1.44747	2.84189e-129	LINK	none available
WBGene00008288	C54C6.6	C54C6.6	1780	1284	1161	418	287	600	673	607	645	1225	1021	1145	-1.45508	1.20983e-05			LINK	none available
WBGene00012119	T28C6.3	T28C6.3	74	72	89	23	25	25	40	27	35	29	14	28	-1.45514	0.00020555			LINK	none available
WBGene00045270	C04E7.5	C04E7.5	45	55	46	14	5	26	31	17	22	25	28	34	-1.4605	0.0339592			LINK	none available
WBGene00010050	F54D5.4	F54D5.4	3660	6998	6082	1524	1104	2534	2699	2452	2801	2545	2028	2461	-1.46051	0.00023603			LINK	none available
WBGene00017594	F19C7.4	F19C7.4	68	110	134	33	25	39	88	69	82	87	65	84	-1.46052	0.0014771			LINK	none available
WBGene00016345	C33E10.1	C33E10.1	38	43	33	10	9	16	39	23	17	38	49	43	-1.46054	0.00889642			LINK	This gene encodes a protein containing an F-box, a motif predicted to mediate protein-protein interactions either with homologs of yeast Skp-1p or with other proteins; its encoded protein also contains a Pfam-B45 motif of presently unknown function.
WBGene00017832	kbp-2	F26F4.13	3113	1948	1851	715	465	947	1955	1740	1992	3388	2521	3016	-1.46193	2.30282e-05			LINK	none available
WBGene00044953	D2096.13	D2096.13	66	60	53	18	10	27	37	29	27	53	41	46	-1.46446	0.00447229			LINK	none available
WBGene00006902	vet-6	F44F1.7	439	434	400	139	144	107	104	137	150	160	109	137	-1.46895	3.13362e-13			LINK	vet-6 encodes a protein that contains a spectrin repeat; vet-6 is preferentially transcribed in embryos prior to gastrulation.
WBGene00020760	T24C4.4	T24C4.4	131	161	142	48	38	47	116	102	109	56	40	49	-1.46981	2.91824e-07	-1.55447	1.46046e-11	LINK	none available
WBGene00195244	F30A10.15	F30A10.15	63	53	57	16	16	21	29	26	38	64	51	42	-1.47041	0.000867253			LINK	none available
WBGene00045458	F17B5.8	F17B5.8	70	137	131	41	30	33	29	26	39	33	35	42	-1.471	0.000726121			LINK	none available
WBGene00306001			1309	822	743	274	253	348	610	575	708	1011	785	913	-1.47292	5.22266e-07			LINK
WBGene00010680	K08F4.12	K08F4.12	46	30	35	11	7	16	15	6	16	22	26	52	-1.47306	0.0169651	1.07056	0.0482134	LINK	none available
WBGene00017459	F14D2.11	F14D2.11	352	286	248	106	56	109	177	189	198	314	293	366	-1.47352	9.06782e-06			LINK	none available
WBGene00019213	H20E11.1	H20E11.1a	673	818	838	250	192	272	522	473	603	1034	750	1018	-1.47422	3.63143e-11			LINK	none available
WBGene00044372	ZC239.21	ZC239.21	44	37	37	12	14	10	22	10	16	21	32	27	-1.47488	0.0052005			LINK	none available
WBGene00017660	F21C10.11	F21C10.11a	65	104	87	25	15	38	31	23	18	6	7	14	-1.47755	0.00280121	-1.79611	0.00115196	LINK	none available
WBGene00019035	fbxb-26	F58E1.3	55	53	31	15	13	14	53	46	67	35	24	32	-1.47923	0.004376	-1.245	9.61817e-05	LINK	This gene encodes a protein containing an F-box, a motif predicted to mediate protein-protein interactions either with homologs of yeast Skp-1p or with other proteins.
WBGene00044665	F59A6.12	F59A6.12	1098	800	756	271	168	367	538	427	549	487	546	698	-1.48217	1.29918e-05			LINK	none available
WBGene00007283	clec-222	C03E10.6	909	804	771	271	174	310	487	439	507	646	533	639	-1.4838	7.92092e-09			LINK	none available
WBGene00017258	F08F1.4	F08F1.4a	377	307	299	97	70	131	196	147	181	223	238	316	-1.48501	1.13764e-06			LINK	none available
WBGene00044414	C06A5.12	C06A5.12	158	158	112	41	25	63	74	54	74	89	91	83	-1.48628	0.000468093			LINK	none available
WBGene00022265	Y73C8C.8	Y73C8C.8	137	114	73	36	26	35	39	37	43	152	101	166	-1.49476	0.000163565	1.42895	4.91588e-09	LINK	none available
WBGene00017076	D2096.9	D2096.9	73	40	25	11	15	15	16	23	18	18	26	22	-1.49713	0.0219768			LINK	none available
WBGene00235325			45	29	39	10	9	15	30	13	19	59	42	45	-1.50017	0.0112707			LINK
WBGene00019243	fbxb-72	H24O09.2	49	18	36	10	10	11	26	24	33	12	15	12	-1.5045	0.0323741	-1.45047	0.00209355	LINK	none available
WBGene00013280	Y57A10C.1	Y57A10C.1	34	21	22	8	7	8	13	15	12	27	7	16	-1.50602	0.0279941			LINK	none available
WBGene00015946	C18A3.10	C18A3.10	108	112	99	33	27	35	49	40	31	90	85	78	-1.50968	2.24384e-06			LINK	none available
WBGene00016071	C24H12.1	C24H12.1	66	38	31	13	10	17	33	36	56	51	40	43	-1.5114	0.0120985			LINK	This gene encodes a protein containing an F-box, a motif predicted to mediate protein-protein interactions either with homologs of yeast Skp-1p or with other proteins; its encoded protein also contains a Pfam-B45 motif of presently unknown function.
WBGene00009156	clec-196	F26D10.12a	186	96	103	28	32	54	220	152	189	59	49	72	-1.51231	0.00174502	-2.01598	7.71634e-24	LINK	none available
WBGene00016678	C45G9.7	C45G9.7	630	417	425	138	109	190	464	314	325	288	459	489	-1.51399	1.93033e-06			LINK	none available
WBGene00021197	Y17G9A.4	Y17G9A.4	156	91	122	35	27	48	103	127	123	298	247	249	-1.51447	0.000328418			LINK	none available
WBGene00284859			27	16	18	6	6	6	4	8	9	6	2	8	-1.52399	0.047896			LINK
WBGene00017252	sdz-10	F08D12.9	30	27	28	5	6	14	25	10	19	16	11	9	-1.52512	0.033366			LINK	This gene encodes a protein containing an F-box, a motif predicted to mediate protein-protein interactions either with homologs of yeast Skp-1p or with other proteins; its encoded protein also contains a Pfam-B45 motif of presently unknown function.
WBGene00249817			68	48	25	11	11	19	5	11	15	22	26	30	-1.527	0.0178599			LINK
WBGene00010219	F57G9.3	F57G9.3	38	26	34	11	6	12	36	20	20	16	5	16	-1.52826	0.0154658	-1.44047	0.00678772	LINK	none available
WBGene00020527	T15B7.15	T15B7.15	46	39	31	14	12	8	7	8	16	27	28	29	-1.53095	0.00606065	1.07755	0.0463489	LINK	none available
WBGene00008904	F17A2.13	F17A2.13	450	282	293	91	99	110	238	234	252	197	165	171	-1.53237	2.14238e-07			LINK	none available
WBGene00016056	C24D10.5	C24D10.5	586	328	306	125	95	137	256	233	252	385	357	419	-1.53308	1.1404e-05			LINK	none available
WBGene00009923	F52B5.7	F52B5.7	771	561	560	187	114	254	462	471	559	726	598	709	-1.53381	9.53749e-06			LINK	none available
WBGene00019041	fbxc-22	F58E1.10	42	21	19	10	5	9	13	22	33	12	6	8	-1.53525	0.0428864	-1.77173	0.00201674	LINK	none available
WBGene00012581	Y38E10A.3	Y38E10A.3	177	54	41	27	20	32	45	43	38	24	28	23	-1.53563	0.0314931	-1.11757	0.00231695	LINK	none available
WBGene00012021	T25E12.6	T25E12.6	336	279	252	84	75	94	175	129	136	95	80	72	-1.53744	7.88811e-11	-1.20731	2.88629e-09	LINK	none available
WBGene00016359	fbxb-88	C33F10.13	85	67	39	11	17	27	71	57	56	44	42	69	-1.53878	0.00832984			LINK	none available
WBGene00013652	sams-2	Y105C5B.12	62	56	40	19	12	15	16	14	7	32	22	29	-1.53975	0.00142016			LINK	none available
WBGene00018903	F55G1.7	F55G1.7a	187	174	125	48	43	50	79	66	74	81	58	76	-1.54117	1.57811e-07			LINK	none available
WBGene00022445	Y110A2AL.9	Y110A2AL.9	111	162	133	35	36	47	31	28	32	39	26	35	-1.5418	4.69043e-06			LINK	none available
WBGene00019922	fbxc-28	R07C3.6	199	131	116	37	49	43	106	94	147	103	69	127	-1.54445	2.72018e-05			LINK	none available
WBGene00044638	F23A7.8	F23A7.8	968	875	494	215	165	291	1067	970	1184	173	889	1103	-1.54894	4.58748e-06			LINK	none available
WBGene00018766	F53G2.1	F53G2.1	44	34	39	12	12	10	19	12	27	57	42	42	-1.54899	0.0038485			LINK	none available
WBGene00018393	msra-1	F43E2.5	11685	3693	3283	2022	1401	1944	739	745	835	1388	1111	1233	-1.55482	0.00218495			LINK	msra-1 encodes a methionine sulfoxide-S-reductase (MsrA) with experimentally confirmed activity.
WBGene00021861	Y54F10BM.6	Y54F10BM.6	22	35	30	7	12	6	13	12	14	15	12	4	-1.55713	0.022411			LINK	none available
WBGene00007315	C04H5.7	C04H5.7a	1862	1212	1146	419	260	534	914	852	1072	1183	1314	1548	-1.56122	4.35943e-06			LINK	none available
WBGene00004822	skr-16	C42D4.6	622	322	333	112	89	165	190	180	204	303	224	282	-1.56253	9.58904e-05			LINK	The skr-16 gene encodes a homolog of Skp1 in S. cerevisiae that has no known function in vivo, since skr-16(RNAi) animals are at least superficially normal.
WBGene00012878	Y45F10C.2	Y45F10C.2	2085	1181	998	441	243	533	1138	876	1096	1385	1245	1501	-1.56907	9.26262e-05			LINK	none available
WBGene00013905	ugt-4	ZC455.5a	237	203	274	63	55	87	113	119	132	297	198	271	-1.57176	1.07789e-06			LINK	none available
WBGene00017539	F17E9.2	F17E9.2	123	85	70	25	23	31	47	67	48	53	84	121	-1.5718	0.00016113			LINK	none available
WBGene00017135	EEED8.4	EEED8.4	405	196	227	90	67	79	148	126	175	144	86	124	-1.57685	3.17653e-05			LINK	none available
WBGene00195142	M110.10	M110.10	142	72	60	17	14	46	31	24	33	75	51	80	-1.5817	0.0187309			LINK	none available
WBGene00016453	vet-2	C35E7.1a	1232	887	767	261	290	257	519	540	547	1121	893	1076	-1.59298	8.65998e-12			LINK	none available
WBGene00001437	fkh-5	F26A1.2	83	38	26	16	19	6	49	38	41	55	32	45	-1.59351	0.0372663			LINK	fkh-5 encodes a member of the forkhead domain transcription factor family.
WBGene00012916	Y46G5A.28	Y46G5A.28	215	115	116	44	36	45	53	44	43	106	110	92	-1.59653	7.9068e-05			LINK	none available
WBGene00015419	srsx-18	C04E6.2	31	19	28	8	6	8	4	10	12	21	13	15	-1.59782	0.0213927			LINK	none available
WBGene00017678	F21F8.4	F21F8.4	617	1061	968	295	241	207	898	818	972	120	94	142	-1.60134	1.91256e-08	-3.29471	3.36186e-190	LINK	none available
WBGene00020081	sdz-29	R52.10	66	40	28	11	11	15	10	11	14	21	14	27	-1.6083	0.00828157			LINK	none available
WBGene00009820	F47B10.9	F47B10.9	748	430	421	147	128	169	430	384	448	400	289	368	-1.60846	3.21034e-07			LINK	none available
WBGene00016697	cyp-33C2	C45H4.17	25	32	19	8	7	6	20	11	8	33	36	18	-1.61002	0.0185792			LINK	none available
WBGene00007459	C08F11.12	C08F11.12	3253	1615	1690	676	395	753	1574	1416	1494	1882	1619	2059	-1.61095	2.37395e-05			LINK	none available
WBGene00009710	F44G3.10	F44G3.10	108	100	77	32	21	26	37	28	35	85	63	77	-1.61196	1.0923e-05			LINK	F44G3.10 encodes a claudin homolog that may be required for normal cohesion of apical junctions in epithelia; F44G3.10 is worm-specific, with obvious homologs only in C. elegans; F44G3.10 has no obvious function in mass RNAi assays; claudins are integral membrane proteins with four transmembrane sequences that are found in mammalian tight junctions (TJs), induce TJs when transgenically expressed …
WBGene00017713	F22E5.20	F22E5.20	73	46	47	15	16	15	52	42	51	51	48	58	-1.6124	0.00102947			LINK	F22E5.20 encodes a protein containing an F-box, a motif predicted to mediate protein-protein interactions either with homologs of yeast Skp-1p or with other proteins.
WBGene00008723	F12F6.8	F12F6.8	112	40	30	20	14	16	43	31	37	83	64	90	-1.61956	0.0218525			LINK	none available
WBGene00009539	F38C2.7	F38C2.7	45	27	19	11	9	5	17	13	19	36	34	39	-1.62144	0.0267678			LINK	F38C2.7 encodes a CCCH tandem zinc finger (TZF) protein; based upon its sequence similarity to other TZF proteins, such as MEX-5 and POS-1, the product of F38C2.7 is predicted to function as an RNA-binding protein.
WBGene00004353	rgs-10	F45B8.2	62	64	62	23	11	18	17	30	24	17	5	13	-1.62351	0.000344575	-1.43308	0.00820074	LINK	none available
WBGene00017208	fbxb-35	F07E5.2	66	44	39	16	7	18	53	53	66	39	29	42	-1.62499	0.00537572	-1.02473	0.000750684	LINK	This gene encodes a protein containing an F-box, a motif predicted to mediate protein-protein interactions either with homologs of yeast Skp-1p or with other proteins; its encoded protein also contains a Pfam-B45 motif of presently unknown function.
WBGene00018647	F49F1.7	F49F1.7	86	253	174	42	44	54	27	19	18	53	46	62	-1.62877	0.00074016			LINK	none available
WBGene00017365	F10G2.4	F10G2.4	56	36	29	11	8	14	35	47	29	19	17	18	-1.63187	0.00697342	-1.42607	0.000556407	LINK	none available
WBGene00009431	dct-17	F35E12.7a	110	503	497	116	99	91	388	351	431	110	106	100	-1.63378	0.00564333	-2.25955	2.71176e-59	LINK	none available
WBGene00007765	C27B7.9	C27B7.9	3431	1340	1169	528	375	710	1449	1292	1384	1139	893	1070	-1.63581	0.000565864			LINK	none available
WBGene00018845	F54H12.5	F54H12.5	985	716	677	183	158	301	343	323	379	888	787	887	-1.64762	3.86088e-07			LINK	This gene encodes a protein containing an F-box, a motif predicted to mediate protein-protein interactions either with homologs of yeast Skp-1p or with other proteins.
WBGene00021860	fbxa-9	Y54F10BM.5	32	35	22	11	7	6	10	8	4	16	15	8	-1.64937	0.0110919			LINK	none available
WBGene00010128	F55G11.8	F55G11.8	745	1303	1136	295	272	293	796	741	897	350	266	356	-1.65243	1.83648e-10	-1.70303	1.16788e-77	LINK	none available
WBGene00013508	Y71A12B.11	Y71A12B.11	292	201	172	59	48	71	184	173	201	204	158	174	-1.65979	5.97054e-07			LINK	none available
WBGene00000461	ceh-40	F17A2.5	379	220	190	79	77	55	236	204	257	237	198	242	-1.66096	8.47285e-06			LINK	ceh-40 encodes one of three C. elegans homeodomain proteins (CEH-20, CEH-40, and CEH-60) homologous to Extradenticle (Exd/Pbx); ceh-40 genetically interacts with ceh-20 and unc-62 during embryonic development: while loss of ceh-40 activity alone results in no significant embryonic lethality, loss of ceh-40 and ceh-20, or ceh-40, ceh-20, and unc-62, results in incompletely penetrant embryonic leth…
WBGene00014472	MTCE.33	MTCE.33	2847	1473	1474	462	365	718	2813	2764	3256	1144	1189	1419	-1.66533	1.63106e-05	-1.60289	1.13475e-36	LINK	none available
WBGene00008207	C49F5.3	C49F5.3	1279	829	729	257	229	270	572	545	661	261	288	283	-1.6662	2.39176e-10	-1.46162	1.28744e-38	LINK	none available
WBGene00003091	lys-2	Y22F5A.5	1952	4960	4188	1087	874	1006	1846	1709	2003	1638	1359	1606	-1.67026	3.81949e-06			LINK	lys-2 is one of ten C. elegans lysozyme genes; as such, lys-2 can be predicted to have a role in lysozymal function including immune function.
WBGene00008202	clec-197	C49C3.12	68	27	29	12	8	13	7	14	17	8	8	10	-1.67151	0.0159273			LINK	none available
WBGene00019956	fbxb-75	R08C7.13	104	66	57	19	23	18	57	66	68	44	31	39	-1.67565	0.00029675	-1.12826	0.000101852	LINK	none available
WBGene00020175	T02H6.5	T02H6.5	31	22	27	5	7	9	14	17	23	30	38	23	-1.69267	0.0140914			LINK	none available
WBGene00012899	Y46G5A.7	Y46G5A.7	136	78	62	20	11	41	56	42	65	108	74	137	-1.69288	0.00757675			LINK	This gene encodes a protein containing an F-box, a motif predicted to mediate protein-protein interactions either with homologs of yeast Skp-1p or with other proteins.
WBGene00008113	C46C2.5	C46C2.5	2047	1181	1131	368	271	501	1268	1177	1340	1860	1525	1919	-1.69478	9.73396e-07			LINK	none available
WBGene00017106	E02H9.9	E02H9.9	23	16	15	4	7	3	7	6	6	27	13	19	-1.70403	0.0479842			LINK	none available
WBGene00044798	tbx-43	Y46E12A.4	18	21	26	5	5	7	14	15	14	34	21	19	-1.70436	0.0242859			LINK	none available
WBGene00016187	C28G1.2	C28G1.2	18	16	27	6	3	7	4	12	9	12	14	16	-1.71152	0.0401717			LINK	none available
WBGene00003983	pes-10	Y46G5A.27	419	209	195	76	70	66	134	83	115	211	175	146	-1.71543	1.1279e-05			LINK	This gene encodes a protein containing an F-box, a motif predicted to mediate protein-protein interactions either with homologs of yeast Skp-1p or with other proteins.
WBGene00022557	fbxb-15	ZC204.7	129	62	32	20	13	24	56	51	70	17	14	24	-1.71643	0.0110749	-2.06256	2.7274e-09	LINK	none available
WBGene00304895			60	67	49	11	7	27	25	27	43	17	29	56	-1.7217	0.00606782			LINK
WBGene00019417	fbxb-52	K05F6.6	23	23	20	8	6	3	7	6	23	13	14	20	-1.72222	0.0230882			LINK	none available
WBGene00016545	C40A11.2	C40A11.2	40	21	36	7	8	10	22	16	28	15	11	25	-1.72664	0.010294			LINK	none available
WBGene00022440	Y110A2AL.3	Y110A2AL.3	46	61	72	12	16	18	16	12	11	13	4	6	-1.72742	0.00053447			LINK	none available
WBGene00008611	fbxb-68	F09C3.3	32	33	22	5	13	4	19	30	20	9	4	12	-1.72925	0.022623	-1.87028	0.000962646	LINK	This gene encodes a protein containing an F-box, a motif predicted to mediate protein-protein interactions either with homologs of yeast Skp-1p or with other proteins; its encoded protein also contains a Pfam-B45 motif of presently unknown function.
WBGene00007864	C32H11.1	C32H11.1a	23	49	45	12	11	7	14	8	11	10	14	8	-1.73143	0.00758994			LINK	C32H11.1 encodes a protein that contains a CUB (complement C1r/C1s, Uegf, Bmp1)-like domain; C32H11.1 expression is induced in response to stressors such as ionizing radiation and bacterial infection.
WBGene00016309	sdz-4	C32B5.16	117	89	85	15	12	47	53	56	92	76	52	66	-1.73146	0.00577258			LINK	none available
WBGene00017764	F25A2.1	F25A2.1	27	68	54	11	7	20	31	25	31	15	14	14	-1.73278	0.0120779	-1.3878	0.00200698	LINK	none available
WBGene00012922	Y47D3A.1	Y47D3A.1	183	133	150	35	18	66	98	62	70	143	104	149	-1.73548	0.000830188			LINK	none available
WBGene00010149	F56D5.5	F56D5.5	426	252	195	77	64	80	219	192	230	119	111	110	-1.73746	2.24375e-06	-1.28631	9.00641e-16	LINK	none available
WBGene00007902	C33D9.9	C33D9.9	161	90	97	24	23	41	63	50	49	226	145	172	-1.74302	0.000160372	1.3583	2.33209e-10	LINK	none available
WBGene00014143	ZK899.5	ZK899.5	115	65	73	18	15	31	45	46	35	108	93	91	-1.74463	0.000568638			LINK	none available
WBGene00008784	F14B6.3	F14B6.3	217	183	157	59	37	45	134	134	121	83	55	66	-1.74598	3.99615e-09	-1.31779	3.48829e-10	LINK	none available
WBGene00013698	Y106G6D.1	Y106G6D.1	336	181	189	54	39	84	74	58	82	213	131	168	-1.75667	5.99552e-05			LINK	none available
WBGene00012851	Y44A6C.2	Y44A6C.2	328	196	159	58	52	60	83	98	90	233	167	221	-1.76237	1.58208e-06			LINK	none available
WBGene00011475	T05D4.2	T05D4.2	154	226	175	38	48	52	81	68	78	53	54	60	-1.76352	1.28315e-08			LINK	none available
WBGene00018021	F34D6.1	F34D6.1	35	26	27	9	3	10	9	15	15	14	3	7	-1.76854	0.0128363			LINK	This gene encodes a protein containing an F-box, a motif predicted to mediate protein-protein interactions either with homologs of yeast Skp-1p or with other proteins.
WBGene00045406	D1086.19	D1086.19	35	21	21	2	6	11	20	18	7	10	8	9	-1.76901	0.0402894			LINK	none available
WBGene00019415	K05F6.4	K05F6.4	129	89	80	28	17	29	31	46	59	62	56	49	-1.77219	2.54734e-05			LINK	This gene encodes a protein containing an F-box, a motif predicted to mediate protein-protein interactions either with homologs of yeast Skp-1p or with other proteins; its encoded protein also contains a Pfam-B45 motif of presently unknown function.
WBGene00004820	skr-14	Y47D7A.8	665	463	423	150	107	128	286	279	318	138	121	140	-1.77365	1.16241e-11	-1.52175	1.00717e-27	LINK	The skr-14 gene encodes a homolog of Skp1 in S. cerevisiae that has no known function in vivo, since skr-14(RNAi) animals are at least superficially normal.
WBGene00009297	sdz-16	F31E9.4	118	71	40	13	19	24	45	41	49	45	35	31	-1.77399	0.00273496			LINK	This gene encodes a protein containing an F-box, a motif predicted to mediate protein-protein interactions either with homologs of yeast Skp-1p or with other proteins.
WBGene00021726	bath-10	Y49F6C.4	114	82	80	21	18	29	91	76	100	158	101	133	-1.78208	1.44112e-05			LINK	none available
WBGene00008016	C38D9.8	C38D9.8	75	39	30	9	14	12	22	21	25	17	17	13	-1.7898	0.00489365			LINK	This gene encodes a protein containing an F-box, a motif predicted to mediate protein-protein interactions either with homologs of yeast Skp-1p or with other proteins.
WBGene00019416	fbxb-44	K05F6.5	21	42	16	6	4	9	16	15	11	20	13	18	-1.79869	0.0263721			LINK	K05F6.5 encodes an unusual paraoxonase-like protein with an N-terminal F-box domain; it is homologous to the human PARAOXONASE 1 gene (PON1, OMIM:168820), which in some allelic forms is associated with susceptibility to coronary artery disease.
WBGene00019214	H20E11.2	H20E11.2	132	252	231	51	28	71	26	15	27	48	39	45	-1.80398	0.00010812			LINK	none available
[truncated: 44,272 more rows]
